# Supplementary material for: Cobalt-catalyzed C(sp2)–H/C(sp3)–H coupling via directed C–H activation and 1,5-hydrogen atom transfer
Source: Royal Society of Chemistry journal article supplement (doi:10.1039/c7qo00906b), 2017-11-02

## Supplementary Information

### Cobalt-Catalyzed C(sp<sup>2</sup>)-H/C(sp<sup>3</sup>)-H Coupling via Directed C-H

### Activation and 1,5-Hydrogen Atom Transfer

Qiao Sun and Naohiko Yoshikai\*

*Division of Chemistry and Biological Chemistry, School of Physical and Mathematical*

*Sciences, Nanyang Technological University, Singapore 637371, Singapore*

## Contents

|                                                                                                                             |     |
|-----------------------------------------------------------------------------------------------------------------------------|-----|
| Materials and Methods .....                                                                                                 | S2  |
| Cobalt-Catalyzed C(sp <sup>2</sup> )-H/C(sp <sup>3</sup> )-H Coupling between Aryl Imines and N-(2-Bromobenzyl)amines ..... | S5  |
| Transformation of Product <b>3aa</b> .....                                                                                  | S16 |
| Reference.....                                                                                                              | S18 |
| NMR Spectra.....                                                                                                            | S19 |

## Materials and Methods

**General.** All reactions dealing with air- or moisture-sensitive compounds were performed by standard Schlenk techniques in oven-dried reaction vessels under nitrogen atmosphere. Analytical thin-layer chromatography (TLC) was performed on Merck 60 F254 silica gel plates. Flash column chromatography was performed using 40-63 $\mu$ m silica gel (Si 60, Merck).  $^1\text{H}$  and  $^{13}\text{C}$  nuclear magnetic resonance (NMR) spectra were recorded on Bruker AV-300 (300 MHz), AV-500 (500 MHz) or BBFO-400 (400 MHz) NMR spectrometers.  $^1\text{H}$  and  $^{13}\text{C}$  NMR spectra are reported in parts per million (ppm) downfield from an internal standard, tetramethylsilane (0 ppm).  $^{19}\text{F}$  NMR spectra are referenced to external  $\text{CF}_3\text{CO}_2\text{H}$  (−76.55 ppm). Gas chromatography (GC) analysis was performed on a Shimadzu GC-2010 system equipped with an FID detector and a glass capillary column, DB-5 (Agilent J&W, 0.25 mm i.d. x 30 m, 0.25  $\mu$ m film thickness). High-resolution mass spectra (HRMS) were obtained with a Q-ToF Premier LC HR mass spectrometer. Melting points were determined using a capillary melting point apparatus and are uncorrected.

**Materials.** Unless otherwise noted, commercial reagents were purchased from Aldrich, Alfa Aesar, and other commercial suppliers and were used as received. Anhydrous  $\text{CoBr}_2$  (> 98%) and 1,3-bis(2,6-diisopropylphenyl)imidazolinium chloride ( $\text{SIPr}\cdot\text{HCl}$ ) were purchased from Alfa Aesar and used as received. THF and 1,2-dimethoxyethane (DME) were distilled over Na/benzophenone. Grignard reagents were prepared from the corresponding alkyl halides and magnesium turnings in anhydrous THF, and titrated before use.

## Preparation of Starting Materials

### Preparation of Aryl Imines

All imines (see below) were synthesized according to the literature procedures,<sup>1</sup> and purified by recrystallization or distillation. Spectral data for these compounds showed good agreement with the literature data.<sup>2</sup>

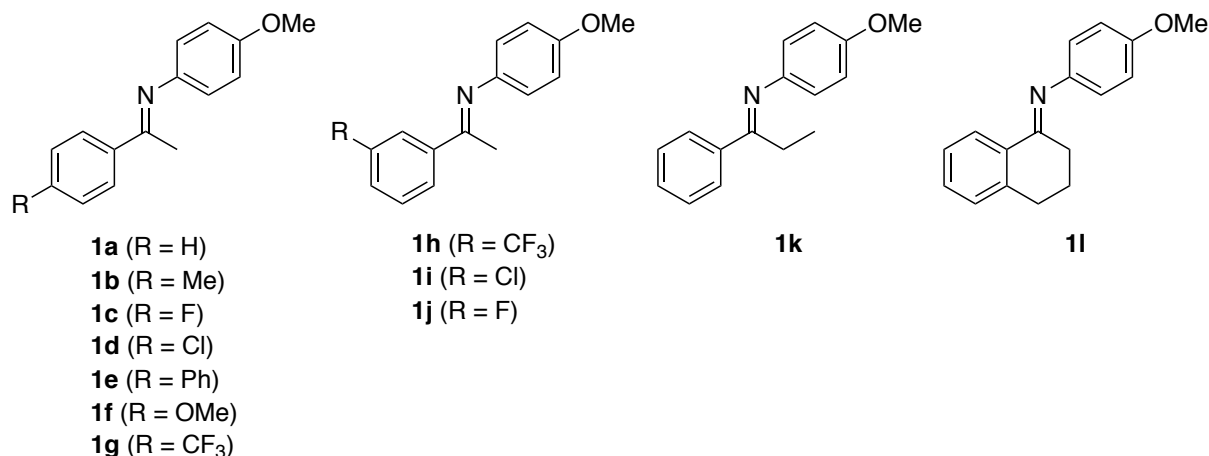

### Preparation of *N*-(2-Bromobenzyl)amines

Cyclic amines were alkylated with 2-bromobenzyl bromide using the method reported by Li (2-bromobenzyl bromide/KOH/EtOH).<sup>3</sup> Acyclic amines were alkylated with 2-bromobenzyl bromide using the method reported by Mugesh (2-bromobenzyl bromide/TEA/toluene).<sup>4</sup> Spectral data for **2a**,<sup>5</sup> **2c**,<sup>6</sup> **2d**,<sup>7</sup> and **2f**<sup>8</sup> showed good agreement with the literature data.

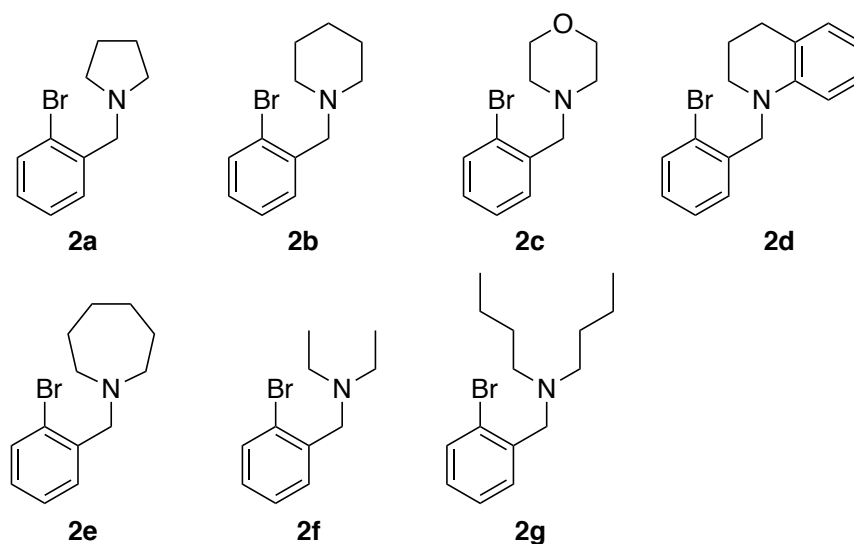

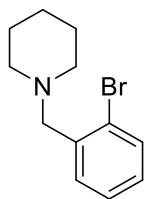

**1-(2-Bromobenzyl)piperidine (2b):** Obtained in 74% yield as a light yellow oil.  $R_f$  0.44 (hexane/EtOAc = 10/1);  $^1\text{H}$  NMR (400 MHz,  $\text{CDCl}_3$ ):  $\delta$  7.53-7.49 (m, 2H), 7.29-7.25 (m, 1H), 7.09 (td,  $J$  = 7.6, 1.6 Hz, 1H), 3.55 (s, 2H), 2.47-2.44 (m, 4H), 1.62-1.56 (m, 4H), 1.48-1.42 (m, 2H);  $^{13}\text{C}$  NMR (100 MHz,  $\text{CDCl}_3$ ):  $\delta$  138.2, 132.5, 130.6, 128.0, 127.1, 124.5, 62.5, 54.6, 26.0, 24.3; HRMS (ESI) Calcd for  $\text{C}_{12}\text{H}_{17}\text{NBr}$   $[\text{M} + \text{H}]^+$  254.0544, found 254.0536.

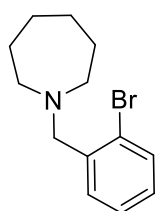

**1-(2-Bromobenzyl)azepane (2e):** Obtained in 71% yield as a light yellow oil.  $R_f$  0.35 (hexane/EtOAc = 10/1);  $^1\text{H}$  NMR (400 MHz,  $\text{CDCl}_3$ ):  $\delta$  7.56-7.51 (m, 2H), 7.30-7.26 (m, 1H), 7.08 (td,  $J$  = 7.6, 1.6 Hz, 1H), 3.71 (s, 2H), 2.70-2.67 (m, 4H), 1.64-1.62 (m, 8H);  $^{13}\text{C}$  NMR (100 MHz,  $\text{CDCl}_3$ ):  $\delta$  139.4, 132.5, 130.4, 127.9, 127.1, 124.2, 61.7, 55.8, 28.4, 27.1; HRMS (ESI) Calcd for  $\text{C}_{13}\text{H}_{19}\text{NBr}$   $[\text{M} + \text{H}]^+$  268.0701, found 268.0703.

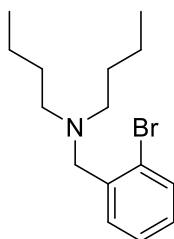

***N*-(2-Bromobenzyl)-*N*-butylbutan-1-amine (2g):** obtained in 70% yield as a light yellow oil.  $R_f$  0.67 (hexane/EtOAc = 10/1);  $^1\text{H}$  NMR (400 MHz,  $\text{CDCl}_3$ ):  $\delta$  7.59-7.50 (m, 2H), 7.30-7.26 (m, 1H), 7.08 (td,  $J$  = 7.6, 1.4 Hz, 1H), 3.63 (s, 2H), 2.46 (t,  $J$  = 7.3 Hz, 4H), 1.50-1.42 (m, 4H), 1.31 (sextet,  $J$  = 7.4 Hz, 4H), 0.89 (t,  $J$  = 7.3 Hz, 6H);  $^{13}\text{C}$  NMR (100 MHz,  $\text{CDCl}_3$ ):  $\delta$  139.8, 132.4, 130.5, 127.8, 127.1, 124.0, 58.3, 54.0, 29.4, 20.6, 14.1; HRMS (ESI) Calcd for  $\text{C}_{15}\text{H}_{25}\text{NBr}$   $[\text{M} + \text{H}]^+$  298.1170, found 298.1170.

# Cobalt-Catalyzed C(sp<sup>2</sup>)-H/C(sp<sup>3</sup>)-H Coupling between Aryl Imines and N-(2-Bromobenzyl)amines

**Table S1.** Formation of Byproducts<sup>a</sup>

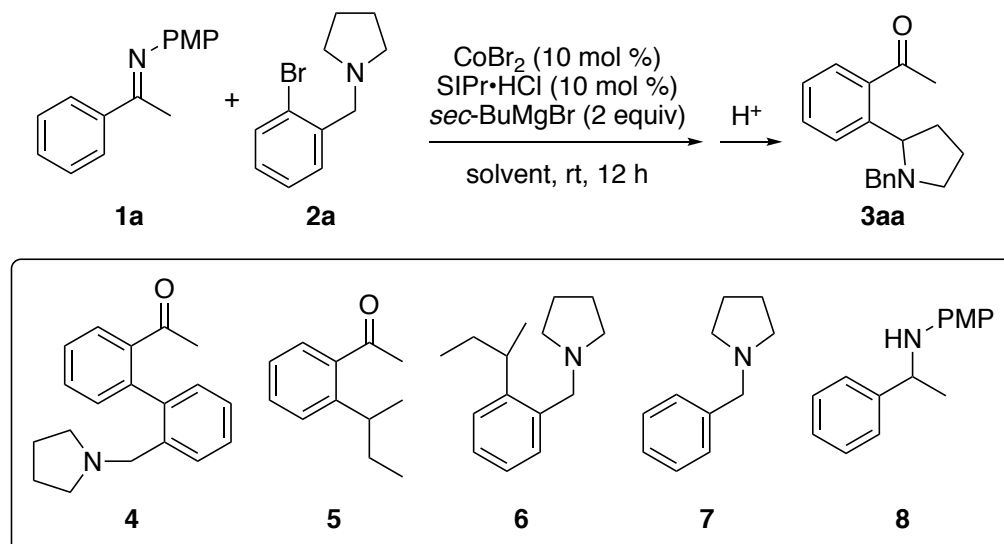

| entry          | solvent                     | yield (%) <sup>b</sup> |   |   |    |    |   |
|----------------|-----------------------------|------------------------|---|---|----|----|---|
|                |                             | 3aa                    | 4 | 5 | 6  | 7  | 8 |
| 1              | THF                         | 30                     | 3 | 3 | 13 | 19 | 3 |
| 2 <sup>c</sup> | THF/Et <sub>2</sub> O (1:1) | 34                     | 4 | 1 | 2  | 14 | 5 |
| 3 <sup>c</sup> | THF/DME (1:1)               | 47                     | 5 | 1 | 16 | 20 | 2 |
| 4 <sup>d</sup> | THF/DME (1:1)               | 55                     | 0 | 5 | 0  | 19 | 6 |

<sup>a</sup>The reaction was performed using 0.3 mmol of **1a** (*c* = 0.3 M) and 0.6 mmol of **2a**. <sup>b</sup>The yield of **3aa** was determined by <sup>1</sup>H NMR. The yields of **4–8** were estimated by GC using *n*-tridecane as an internal standard. <sup>c</sup>The amount of *sec*-BuMgBr was 2.2 equiv. <sup>d</sup>The reaction was performed using 0.4 mmol of **1a** and 0.2 mmol of **2a** (*c* = 0.2 M) at 0 °C.

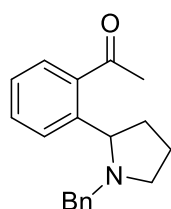

**Typical Procedure: 1-(2-(1-Benzylpyrrolidin-2-yl)phenyl)ethan-1-one (3aa).** In a 10 ml Schlenk tube were placed 1-(2-bromobenzyl)pyrrolidine (**2a**, 48.0 mg, 0.20 mmol), (*E*)-*N*-(4-methoxyphenyl)-1-phenylethan-1-imine (**1a**, 90.1 mg, 0.40 mmol), 1,3-bis(2,6-

diisopropylphenyl)imidazolinium chloride (SIPr•HCl, 8.5 mg, 0.020 mmol), a freshly prepared THF solution of CoBr<sub>2</sub> (0.10 M, 0.20 mL, 0.020 mmol), and DME (0.50 ml). The resulting solution was cooled in an ice bath, followed by the addition of a THF solution of *sec*-BuMgBr (1.34 M, 0.30 ml, 0.40 mmol). The resulting mixture was stirred in the ice bath for 12 h, and then quenched by the addition of 3 N HCl (1.0 ml). The resulting mixture was stirred at room temperature for 1 h, and then neutralized with 3 N NaOH (2.0 ml) and extracted with EtOAc (3 x 10 ml). The combined organic layer was dried over MgSO<sub>4</sub> and concentrated under reduced pressure. The crude product was purified by silica gel chromatography (eluent: hexane/EtOAc = 10/1) to afford the title compound as a light yellow oil (27.4 mg, 49%).

*R<sub>f</sub>* 0.32 (hexane/EtOAc = 10/1); <sup>1</sup>H NMR (400 MHz, CDCl<sub>3</sub>): δ 8.11 (d, *J* = 7.8 Hz, 1H), 7.59 (dd, *J* = 7.7, 0.7 Hz, 1H), 7.55-7.51 (m, 1H), 7.32-7.21 (m, 6H), 3.92 (t, *J* = 8.2 Hz, 1H), 3.81 (d, *J* = 13.1 Hz, 1H), 3.14-3.08 (m, 1H), 3.10 (d, *J* = 13.2 Hz, 1H), 2.61 (s, 3H), 2.51-2.42 (m, 1H), 2.24 (q, *J* = 8.9 Hz, 1H), 1.93-1.75 (m, 2H), 1.70-1.61 (m, 1H); <sup>13</sup>C NMR (100 MHz, CDCl<sub>3</sub>): δ 202.4, 144.2, 139.7, 139.0, 131.7, 128.5, 128.0 (two signals overlapped), 127.9, 126.6, 126.1, 65.3, 58.5, 53.3, 35.0, 30.2, 22.7; HRMS (ESI) Calcd for C<sub>19</sub>H<sub>22</sub>NO [M + H]<sup>+</sup> 280.1701, found 280.1699.

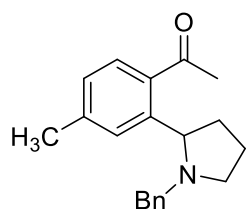

**1-(2-(1-Benzylpyrrolidin-2-yl)-4-methylphenyl)ethan-1-one (3ba):** The typical procedure was applied to (*E*)-*N*-(4-methoxyphenyl)-1-(*p*-tolyl)ethan-1-imine (**1b**, 95.7 mg, 0.40 mmol) and 1-(2-bromobenzyl)pyrrolidine (**2a**, 48.0 mg, 0.20 mmol). Silica gel chromatography (eluent: hexane/EtOAc = 20/1) of the crude product afforded the title compound as a brown oil (28.2 mg, 48%).

*R<sub>f</sub>* 0.23 (hexane/EtOAc = 10/1); <sup>1</sup>H NMR (400 MHz, CDCl<sub>3</sub>): δ 7.91 (s, 1H), 7.53 (d, *J* = 7.9 Hz, 1H), 7.31-7.28 (m, 4H), 7.24-7.19 (m, 1H), 7.09 (d, *J* = 7.6 Hz, 1H), 3.95 (t, *J* = 8.2 Hz, 1H), 3.77 (d, *J* = 13.0 Hz, 1H), 3.11-3.03 (m, 1H), 3.05 (d, *J* = 13.0 Hz, 1H), 2.58 (s, 3H), 2.49-2.40 (m, 1H), 2.42 (s, 3H), 2.22 (q, *J* = 8.9 Hz, 1H), 1.89-1.73 (m, 2H), 1.63-1.54 (m, 1H); <sup>13</sup>C NMR (100 MHz, CDCl<sub>3</sub>): δ 201.7, 144.7, 142.4, 139.9, 135.9, 128.8, 128.6, 128.5, 128.1, 126.8, 126.7, 65.3, 58.7, 53.4, 34.9, 30.0, 22.7, 21.7; HRMS (ESI) Calcd for C<sub>20</sub>H<sub>24</sub>NO

$[M + H]^+$  294.1858, found 294.1863.

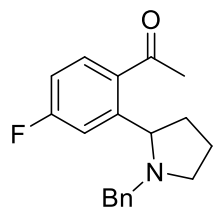

**1-(2-(1-Benzylpyrrolidin-2-yl)-4-fluorophenyl)ethan-1-one (3ca):** The typical procedure was applied to (*E*)-1-(4-fluorophenyl)-*N*-(4-methoxyphenyl)ethan-1-imine (**1c**, 97.3 mg, 0.40 mmol) and 1-(2-bromobenzyl)pyrrolidine (**2a**, 48.0 mg, 0.20 mmol). Silica gel chromatography (eluent: hexane/EtOAc = 30/1) of the crude product afforded the title compound as a white solid (30.4 mg, 51%).

$R_f$  0.35 (hexane/EtOAc = 10/1); m.p. 92.9-95.9 °C;  $^1\text{H}$  NMR (400 MHz,  $\text{CDCl}_3$ ):  $\delta$  7.86 (dd,  $J$  = 11.0, 2.7 Hz, 1H), 7.66 (dd,  $J$  = 8.6, 5.7 Hz, 1H), 7.31-7.27 (m, 4H), 7.25-7.19 (m, 1H), 6.96 (td,  $J$  = 8.1, 2.7 Hz, 1H), 4.03 (td,  $J$  = 8.0, 1.4 Hz, 1H), 3.76 (d,  $J$  = 13.1 Hz, 1H), 3.14-3.07 (m, 1H), 3.13 (d,  $J$  = 13.1 Hz, 1H), 2.58 (s, 3H), 2.52-2.42 (m, 1H), 2.25 (q,  $J$  = 8.9 Hz, 1H), 1.89-1.75 (m, 2H), 1.60-1.51 (m, 1H);  $^{13}\text{C}$  NMR (100 MHz,  $\text{CDCl}_3$ ):  $\delta$  200.3, 165.1 ( $^1J_{\text{C-F}}$  = 250.5 Hz), 149.6 (d,  $^3J_{\text{C-F}}$  = 7.6 Hz), 139.6, 134.3 (d,  $^4J_{\text{C-F}}$  = 2.6 Hz), 131.2 (d,  $^3J_{\text{C-F}}$  = 8.8 Hz), 128.6, 128.1, 126.8, 114.8 (d,  $^2J_{\text{C-F}}$  = 22.8 Hz), 113.1 (d,  $^2J_{\text{C-F}}$  = 22.1 Hz), 65.0, 58.8, 53.5, 35.0, 29.9, 22.9;  $^{19}\text{F}$  NMR (376 MHz,  $\text{CDCl}_3$ ):  $\delta$  -106.7; HRMS (ESI) Calcd for  $\text{C}_{19}\text{H}_{21}\text{NOF}$   $[M + H]^+$  298.1607, found 298.1616.

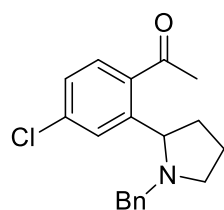

**1-(2-(1-Benzylpyrrolidin-2-yl)-4-chlorophenyl)ethan-1-one (3da):** The typical procedure was applied to (*E*)-1-(4-chlorophenyl)-*N*-(4-methoxyphenyl)ethan-1-imine (**1d**, 103.9 mg, 0.40 mmol) and 1-(2-bromobenzyl)pyrrolidine (**2a**, 48.0 mg, 0.20 mmol). Silica gel chromatography (eluent: hexane/EtOAc = 40/1) of the crude product afforded the title compound as a light yellow oil (24.8 mg, 39%).

$R_f$  0.33 (hexane/EtOAc = 10/1);  $^1\text{H}$  NMR (400 MHz,  $\text{CDCl}_3$ ):  $\delta$  8.11 (d,  $J$  = 2.1 Hz, 1H), 7.54 (d,  $J$  = 8.3 Hz, 1H), 7.31-7.19 (m, 6H), 3.93 (t,  $J$  = 8.1 Hz, 1H), 3.74 (d,  $J$  = 13.0 Hz, 1H), 3.14-3.07 (m, 1H), 3.13 (d,  $J$  = 13.0 Hz, 1H), 2.57 (s, 3H), 2.49-2.40 (m, 1H), 2.25 (q,  $J$  = 8.9

Hz, 1H), 1.89-1.72 (m, 2H), 1.62-1.53 (m, 1H);  $^{13}\text{C}$  NMR (100 MHz,  $\text{CDCl}_3$ ):  $\delta$  200.9, 147.4, 139.4, 138.2, 136.6, 129.8, 128.6, 128.3, 128.1, 126.8, 126.3, 64.9, 58.8, 53.5, 35.0, 30.0, 22.9; HRMS (ESI) Calcd for  $\text{C}_{19}\text{H}_{21}\text{NOCl}$   $[\text{M} + \text{H}]^+$  314.1312, found 314.1316.

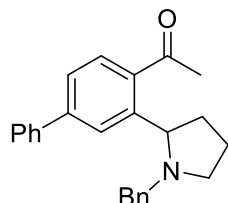

**1-(3-(1-Benzylpyrrolidin-2-yl)-[1,1'-biphenyl]-4-yl)ethan-1-one (3ea):** The typical procedure was applied to (*E*)-1-([1,1'-biphenyl]-4-yl)-*N*-(4-methoxyphenyl)ethan-1-imine (**1e**, 120.6 mg, 0.40 mmol) and 1-(2-bromobenzyl)pyrrolidine (**2a**, 48.0 mg, 0.20 mmol). Silica gel chromatography (eluent: hexane/EtOAc = 20/1) of the crude product afforded the title compound as a white solid (23.5 mg, 33%).

$R_f$  0.27 (hexane/EtOAc = 10/1); m.p. 98.5-101.5  $^\circ\text{C}$ ;  $^1\text{H}$  NMR (400 MHz,  $\text{CDCl}_3$ ):  $\delta$  8.38 (d,  $J$  = 1.7 Hz, 1H), 7.70-7.65 (m, 3H), 7.52 (dd,  $J$  = 8.0, 1.8 Hz, 1H), 7.47 (t,  $J$  = 7.5 Hz, 2H), 7.39 (t,  $J$  = 7.3 Hz, 1H), 7.32-7.27 (m, 4H), 7.20 (t,  $J$  = 6.9 Hz, 1H), 4.03 (t,  $J$  = 8.1 Hz, 1H), 3.85 (d,  $J$  = 13.2 Hz, 1H), 3.17-3.11 (m, 1H), 3.15 (d,  $J$  = 13.3 Hz, 1H), 2.63 (s, 3H), 2.54-2.45 (m, 1H), 2.27 (q,  $J$  = 8.9 Hz, 1H), 1.92-1.75 (m, 2H), 1.70-1.61 (m, 1H);  $^{13}\text{C}$  NMR (100 MHz,  $\text{CDCl}_3$ ):  $\delta$  201.8, 145.4, 144.4, 140.3, 139.8, 137.3, 129.1, 128.9, 128.5, 128.1, 127.9, 127.3, 126.7 (two signals overlapped), 124.7, 65.4, 58.7, 53.6, 35.1, 30.1, 22.8; HRMS (ESI) Calcd for  $\text{C}_{25}\text{H}_{26}\text{NO}$   $[\text{M} + \text{H}]^+$  356.2014, found 356.2014.

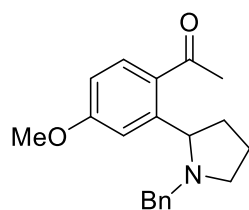

**1-(2-(1-Benzylpyrrolidin-2-yl)-4-methoxyphenyl)ethan-1-one (3fa):** The typical procedure was applied to (*E*)-*N*,1-bis(4-methoxyphenyl)ethan-1-imine (**1f**, 102.1 mg, 0.40 mmol) and 1-(2-bromobenzyl)pyrrolidine (**2a**, 48.0 mg, 0.20 mmol). Silica gel chromatography (eluent: hexane/EtOAc = 8/1) of the crude product afforded the title compound as a light yellow oil (18.4 mg, 30%).

$R_f$  0.17 (hexane/EtOAc = 10/1);  $^1\text{H}$  NMR (400 MHz,  $\text{CDCl}_3$ ):  $\delta$  7.77 (d,  $J$  = 2.7 Hz, 1H), 7.70 (d,  $J$  = 8.6 Hz, 1H), 7.32-7.27 (m, 4H), 7.23-7.19 (m, 1H), 6.79 (dd,  $J$  = 8.7, 2.7 Hz, 1H), 4.16



(t,  $J = 8.1$  Hz, 1H), 3.88 (s, 3H), 3.80 (d,  $J = 13.2$  Hz, 1H), 3.12-3.07 (m, 1H), 3.09 (d,  $J = 13.2$  Hz, 1H), 2.57 (s, 3H), 2.54-2.47 (m, 1H), 2.24 (q,  $J = 8.9$  Hz, 1H), 1.84-1.75 (m, 2H), 1.58-1.50 (m, 1H);  $^{13}\text{C}$  NMR (100 MHz,  $\text{CDCl}_3$ ):  $\delta$  199.8, 162.8, 148.9, 140.1, 131.9, 130.5, 128.4, 128.1, 126.6, 112.3, 111.8, 65.4, 58.7, 55.4, 53.5, 34.7, 29.5, 22.9; HRMS (ESI) Calcd for  $\text{C}_{20}\text{H}_{24}\text{NO}_2$   $[\text{M} + \text{H}]^+$  310.1807, found 310.1805.

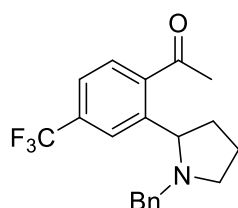

**1-(2-(1-Benzylpyrrolidin-2-yl)-4-(trifluoromethyl)phenyl)ethan-1-one (3ga):** The typical procedure was applied to (*E*)-*N*-(4-methoxyphenyl)-1-(4-(trifluoromethyl)phenyl)ethan-1-imine (**1g**, 117.3 mg, 0.40 mmol) and 1-(2-bromobenzyl)pyrrolidine (**2a**, 48.0 mg, 0.20 mmol). Silica gel chromatography (eluent: hexane/EtOAc = 30/1) of the crude product afforded the title compound as a light yellow oil (14.5 mg, 21%).

$R_f$  0.33 (hexane/EtOAc = 10/1);  $^1\text{H}$  NMR (500 MHz,  $\text{CDCl}_3$ ):  $\delta$  8.36 (s, 1H), 7.60 (d,  $J = 8.0$  Hz, 1H), 7.53 (d,  $J = 7.9$  Hz, 1H), 7.28-7.19 (m, 5H), 3.85 (t,  $J = 8.1$  Hz, 1H), 3.69 (d,  $J = 12.9$  Hz, 1H), 3.17-3.09 (m, 1H), 3.16 (d,  $J = 12.9$  Hz, 1H), 2.60 (s, 3H), 2.46-2.39 (m, 1H), 2.29 (q,  $J = 8.9$  Hz, 1H), 1.91-1.75 (m, 2H), 1.65-1.58 (m, 1H);  $^{13}\text{C}$  NMR (100 MHz,  $\text{CDCl}_3$ ):  $\delta$  201.8, 145.5, 141.9, 139.1, 133.1 (q,  $^2J_{\text{C-F}} = 31.7$  Hz), 128.7, 128.2, 127.8, 126.9, 125.4, 123.8 (q,  $^1J_{\text{C-F}} = 272.0$  Hz), 123.1, 65.1, 58.8, 53.6, 35.3, 30.4, 22.9;  $^{19}\text{F}$  NMR (376 MHz,  $\text{CDCl}_3$ ):  $\delta$  -63.0; HRMS (ESI) Calcd for  $\text{C}_{20}\text{H}_{21}\text{NOF}_3$   $[\text{M} + \text{H}]^+$  348.1575, found 348.1578.

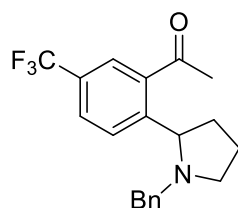

**1-(2-(1-Benzylpyrrolidin-2-yl)-5-(trifluoromethyl)phenyl)ethan-1-one (3ha):** The typical procedure was applied to (*E*)-*N*-(4-methoxyphenyl)-1-(3-(trifluoromethyl)phenyl)ethan-1-imine (**1h**, 117.3 mg, 0.40 mmol) and 1-(2-bromobenzyl)pyrrolidine (**2a**, 48.0 mg, 0.20 mmol). Silica gel chromatography (eluent: hexane/EtOAc = 30/1) of the crude product afforded the title compound as a light yellow oil (42.1 mg, 61%).

$R_f$  0.40 (hexane/EtOAc = 10/1);  $^1\text{H}$  NMR (500 MHz,  $\text{CDCl}_3$ ):  $\delta$  8.22 (d,  $J = 8.3$  Hz, 1H), 7.77

(s, 1H), 7.74 (d,  $J = 8.3$  Hz, 1H), 7.29-7.20 (m, 5H), 3.92 (t,  $J = 8.2$  Hz, 1H), 3.71 (d,  $J = 13.1$  Hz, 1H), 3.16-3.10 (m, 1H), 3.15 (d,  $J = 13.1$  Hz, 1H), 2.62 (s, 3H), 2.49-2.41 (m, 1H), 2.27 (q,  $J = 8.9$  Hz, 1H), 1.91-1.76 (m, 2H), 1.64-1.56 (m, 1H);  $^{13}\text{C}$  NMR (100 MHz,  $\text{CDCl}_3$ ):  $\delta$  201.1, 148.8, 139.2 (two signals overlapped), 128.9, 128.6 (q,  $^2J_{\text{C-F}} = 32.5$  Hz), 128.5, 128.1 (two signals overlapped), 126.8, 124.6 (q,  $^3J_{\text{C-F}} = 3.3$  Hz), 123.8 (q,  $^1J_{\text{C-F}} = 270.7$  Hz), 65.1, 58.6, 53.5, 35.2, 30.2, 22.9;  $^{19}\text{F}$  NMR (376 MHz,  $\text{CDCl}_3$ ):  $\delta$  -62.5; HRMS (ESI) Calcd for  $\text{C}_{20}\text{H}_{21}\text{NOF}_3$   $[\text{M} + \text{H}]^+$  348.1575, found 348.1582.

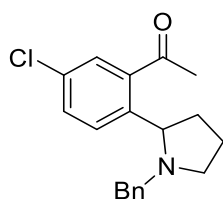

**1-(2-(1-Benzylpyrrolidin-2-yl)-5-chlorophenyl)ethan-1-one (3ia):** The typical procedure was applied to (*E*)-1-(3-chlorophenyl)-*N*-(4-methoxyphenyl)ethan-1-imine (**1i**, 103.9 mg, 0.40 mmol) and 1-(2-bromobenzyl)pyrrolidine (**2a**, 48.0 mg, 0.20 mmol). Silica gel chromatography (eluent: hexane/ $\text{Et}_2\text{O}$  = 20/1) of the crude product afforded the compound **3ia** in a pure form (14.2 mg, 23%) as a light yellow oil and a mixture of **3ia** and *N*-(1-(3-chlorophenyl)ethyl)-4-methoxyaniline (reduced product of **1i**; 16.3 mg, 26%, ratio = 5:1 as determined by  $^1\text{H}$  NMR) as a yellow oil. Characterization data of **3ia** are given below.

$R_f$  0.46 (hexane/ $\text{EtOAc}$  = 10/1);  $^1\text{H}$  NMR (400MHz,  $\text{CDCl}_3$ ):  $\delta$  8.01 (d,  $J = 8.4$  Hz, 1H), 7.51 (d,  $J = 2.2$  Hz, 1H), 7.46 (dd,  $J = 8.5, 2.2$  Hz, 1H), 7.30-7.19 (m, 5H), 3.82 (t,  $J = 8.1$  Hz, 1H), 3.73 (d,  $J = 13.1$  Hz, 1H), 3.10-3.06 (m, 1H), 3.09 (d,  $J = 13.0$  Hz, 1H), 2.57 (s, 3H), 2.44-2.35 (m, 1H), 2.22 (q,  $J = 8.9$  Hz, 1H), 1.89-1.72 (m, 2H), 1.62-1.53 (m, 1H);  $^{13}\text{C}$  NMR (100 MHz,  $\text{CDCl}_3$ ):  $\delta$  201.1, 142.9, 140.3, 139.5, 131.9, 131.6, 129.8, 128.5, 128.1, 127.7, 126.8, 64.9, 58.5, 53.4, 35.1, 30.2, 22.8; HRMS (ESI) Calcd for  $\text{C}_{19}\text{H}_{21}\text{NOCl}$   $[\text{M} + \text{H}]^+$  314.1312, found 314.1310.

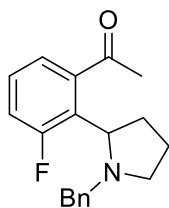

**1-(2-(1-Benzylpyrrolidin-2-yl)-3-fluorophenyl)ethan-1-one (3ja):** The typical procedure was applied to (*E*)-1-(3-fluorophenyl)-*N*-(4-methoxyphenyl)ethan-1-imine (**1j**, 97.3 mg, 0.40

mmol) and 1-(2-bromobenzyl)pyrrolidine (**2a**, 48.0 mg, 0.20 mmol). Silica gel chromatography (eluent: Hex/EtOAc = 10/1) of the crude product afforded the title compound as a light yellow oil (31.6 mg, 53%).

$R_f$  0.17 (hexane/EtOAc = 10/1);  $^1\text{H}$  NMR (500 MHz,  $\text{CDCl}_3$ ):  $\delta$  7.29-7.18 (m, 6H), 7.07 (t,  $J$  = 9.3 Hz, 1H), 7.00 (d,  $J$  = 7.6 Hz, 1H), 3.97 (t,  $J$  = 8.5 Hz, 1H), 3.76 (d,  $J$  = 13.6 Hz, 1H), 3.23 (d,  $J$  = 13.6 Hz, 1H), 3.01-2.98 (m, 1H), 2.51 (s, 3H), 2.34 (q,  $J$  = 8.8 Hz, 1H), 2.28-2.21 (m, 1H), 2.04-1.86 (m, 2H), 1.75-1.68 (m, 1H);  $^{13}\text{C}$  NMR (100 MHz,  $\text{CDCl}_3$ ):  $\delta$  202.8 (d,  $^4J_{\text{C-F}}$  = 2.0 Hz), 161.1 (d,  $^1J_{\text{C-F}}$  = 247.0 Hz), 143.6 (d,  $^3J_{\text{C-F}}$  = 3.0 Hz), 137.8, 129.3, 128.6 (d,  $^2J_{\text{C-F}}$  = 13.0 Hz), 128.1, 128.0, 126.8, 121.8 (d,  $^3J_{\text{C-F}}$  = 3.0 Hz), 116.4 (d,  $^2J_{\text{C-F}}$  = 23.0 Hz), 60.5, 58.0, 52.8, 32.6, 31.7, 23.1;  $^{19}\text{F}$  NMR (376 MHz,  $\text{CDCl}_3$ ):  $\delta$  -114.4; HRMS (ESI) Calcd for  $\text{C}_{19}\text{H}_{21}\text{NOF}$   $[\text{M} + \text{H}]^+$  298.1607, found 298.1612.

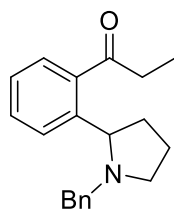

**1-(2-(1-Benzylpyrrolidin-2-yl)phenyl)propan-1-one (3ka):** The typical procedure was applied to (*E*)-*N*-(4-methoxyphenyl)-1-phenylpropan-1-imine (**1k**, 95.7 mg, 0.40 mmol) and 1-(2-bromobenzyl)pyrrolidine (**2a**, 48.0 mg, 0.20 mmol) for 24 h. Silica gel chromatography (eluent: hexane/EtOAc = 30/1) of the crude product afforded the title compound as a light yellow oil (12.4 mg, 21%).

$R_f$  0.35 (hexane/EtOAc = 10/1);  $^1\text{H}$  NMR (400 MHz,  $\text{CDCl}_3$ ):  $\delta$  8.04 (d,  $J$  = 7.5 Hz, 1H), 7.51-7.48 (m, 2H), 7.30-7.26 (m, 5H), 7.24-7.19 (m, 1H), 3.78 (d,  $J$  = 13.1 Hz, 1H), 3.72 (t,  $J$  = 8.2 Hz, 1H), 3.10-2.80 (m, 4H), 2.44-2.35 (m, 1H), 2.20 (q,  $J$  = 8.9 Hz, 1H), 1.91-1.72 (m, 2H), 1.69-1.60 (m, 1H), 1.21 (t,  $J$  = 7.3 Hz, 3H);  $^{13}\text{C}$  NMR (100 MHz,  $\text{CDCl}_3$ ):  $\delta$  206.1, 143.6, 139.7, 139.6, 131.2, 128.6, 128.1, 127.9, 126.9, 126.7, 126.2, 65.6, 58.4, 53.3, 35.7, 35.3, 22.7, 8.4; HRMS (ESI) Calcd for  $\text{C}_{20}\text{H}_{24}\text{NO}$   $[\text{M} + \text{H}]^+$  294.1858, found 294.1860.

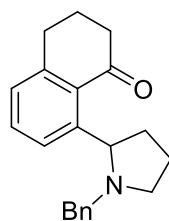

**8-(1-Benzylpyrrolidin-2-yl)-3,4-dihydronaphthalen-1(2H)-one (3la):** The typical

procedure was applied to (*E*)-*N*-(4-methoxyphenyl)-3,4-dihydronaphthalen-1(2*H*)-imine (**1l**, 100.5 mg, 0.40 mmol) and 1-(2-bromobenzyl)pyrrolidine (**2a**, 48.0 mg, 0.20 mmol). Silica gel chromatography (eluent: hexane/EtOAc = 10/1) of the crude product afforded the title compound as a light yellow oil (27.1 mg, 44%).

*R<sub>f</sub>* 0.20 (hexane/EtOAc = 10/1); <sup>1</sup>H NMR (400 MHz, CDCl<sub>3</sub>): δ 8.12 (d, *J* = 7.7 Hz, 1H), 7.46 (t, *J* = 7.7 Hz, 1H), 7.33-7.29 (m, 4H), 7.21 (t, *J* = 6.8 Hz, 1H), 7.12 (d, *J* = 7.3 Hz, 1H), 4.41 (t, *J* = 8.0 Hz, 1H), 3.78 (d, *J* = 13.1 Hz, 1H), 3.11-3.05 (m, 1H), 3.07 (d, *J* = 13.1 Hz, 1H), 2.98-2.94 (m, 2H), 2.76-2.55 (m, 3H), 2.24 (q, *J* = 8.8 Hz, 1H), 2.16-2.05 (m, 2H), 1.84-1.76 (m, 2H), 1.53-1.44 (m, 1H); <sup>13</sup>C NMR (100 MHz, CDCl<sub>3</sub>): δ 200.2, 148.2, 145.3, 140.2, 132.9, 131.5, 128.5, 128.1, 127.0, 126.6, 125.9, 65.5, 59.0, 53.5, 41.2, 34.2, 31.1, 22.94, 22.90; HRMS (ESI) Calcd for C<sub>21</sub>H<sub>24</sub>NO [M + H]<sup>+</sup> 306.1858, found 306.1859.

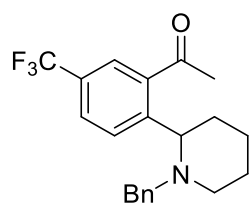

**1-(2-(1-Benzylpiperidin-2-yl)-5-(trifluoromethyl)phenyl)ethan-1-one (3hb):** The typical procedure was applied to (*E*)-*N*-(4-methoxyphenyl)-1-(3-(trifluoromethyl)phenyl)ethan-1-imine (**1h**, 117.3 mg, 0.40 mmol) and 1-(2-bromobenzyl)piperidine (**2b**, 50.8 mg, 0.20 mmol). Silica gel chromatography (eluent: hexane/EtOAc = 60/1) of the crude product afforded the title compound as a light yellow oil (15.9 mg, 22%).

*R<sub>f</sub>* 0.38 (hexane/EtOAc = 10/1); <sup>1</sup>H NMR (500 MHz, CDCl<sub>3</sub>): δ 8.17 (d, *J* = 8.7 Hz, 1H), 7.73-7.71 (m, 2H), 7.29-7.19 (m, 5H), 3.66 (dd, *J* = 10.4, 2.5 Hz, 1H), 3.59 (d, *J* = 13.5 Hz, 1H), 2.97 (d, *J* = 11.5 Hz, 1H), 2.84 (d, *J* = 13.6 Hz, 1H), 2.63 (s, 3H), 1.99-1.92 (m, 2H), 1.79 (d, *J* = 12.5 Hz, 1H), 1.64-1.36 (m, 4H); <sup>13</sup>C NMR (75 MHz, CDCl<sub>3</sub>): δ 201.8, 148.9, 139.6, 139.2, 129.2, 128.7 (q, <sup>2</sup>*J*<sub>C-F</sub> = 32.8 Hz), 128.4, 128.1, 127.8 (q, <sup>3</sup>*J*<sub>C-F</sub> = 3.3 Hz), 126.8, 124.1 (q, <sup>3</sup>*J*<sub>C-F</sub> = 4.0 Hz), 123.7 (q, <sup>1</sup>*J*<sub>C-F</sub> = 270.5 Hz), 63.8, 60.1, 53.2, 36.5, 30.7, 25.8, 24.9; <sup>19</sup>F NMR (376 MHz, CDCl<sub>3</sub>): δ -62.5; HRMS (ESI) Calcd for C<sub>21</sub>H<sub>23</sub>NOF<sub>3</sub> [M + H]<sup>+</sup> 362.1732, found 362.1730.

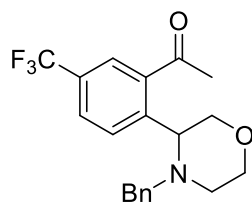

**1-(2-(4-Benzylmorpholin-3-yl)-5-(trifluoromethyl)phenyl)ethan-1-one (3hc):** The typical procedure was applied to (*E*)-*N*-(4-methoxyphenyl)-1-(3-(trifluoromethyl)phenyl)ethan-1-imine (**1h**, 117.3 mg, 0.40 mmol) and 4-(2-bromobenzyl)morpholine (**2c**, 51.2 mg, 0.20 mmol). Silica gel chromatography (eluent: hexane/EtOAc = 10/1) of the crude product afforded the title compound as a light yellow oil (12.4 mg, 17%).

$R_f$  0.22 (hexane/EtOAc = 10/1);  $^1\text{H}$  NMR (400 MHz,  $\text{CDCl}_3$ ):  $\delta$  8.21 (d,  $J$  = 8.2 Hz, 1H), 7.79-7.76 (m, 2H), 7.31-7.21 (m, 5H), 4.01-3.96 (m, 2H), 3.86 (d,  $J$  = 11.2 Hz, 1H), 3.71-3.62 (m, 2H), 3.35 (t,  $J$  = 11.2 Hz, 1H), 2.93 (d,  $J$  = 13.3 Hz, 1H), 2.79 (d,  $J$  = 11.8 Hz, 1H), 2.66 (s, 3H), 2.32 (td,  $J$  = 11.8, 3.3 Hz, 1H);  $^{13}\text{C}$  NMR (100MHz,  $\text{CDCl}_3$ ):  $\delta$  200.9, 143.1, 140.6, 137.9, 129.9, 129.6 (q,  $^2J_{\text{C-F}}$  = 32.7 Hz), 128.6, 128.3, 127.9 (q,  $^3J_{\text{C-F}}$  = 3.3 Hz), 127.1, 124.6 (q,  $^3J_{\text{C-F}}$  = 3.7 Hz), 123.6 (q,  $^1J_{\text{C-F}}$  = 270.7 Hz), 72.9, 67.4, 62.7, 59.6, 51.8, 30.3;  $^{19}\text{F}$  NMR (376 MHz,  $\text{CDCl}_3$ ):  $\delta$  -62.7; HRMS (ESI) Calcd for  $\text{C}_{20}\text{H}_{21}\text{NO}_2\text{F}_3$   $[\text{M} + \text{H}]^+$  364.1524, found 364.1520.

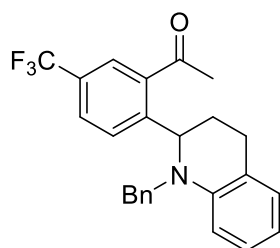

**1-(2-(1-Benzyl-1,2,3,4-tetrahydroquinolin-2-yl)-5-(trifluoromethyl)phenyl)ethan-1-one (3hd):** The typical procedure was applied to (*E*)-*N*-(4-methoxyphenyl)-1-(3-(trifluoromethyl)phenyl)ethan-1-imine (**1h**, 117.3 mg, 0.40 mmol) and 1-(2-bromobenzyl)-1,2,3,4-tetrahydroquinoline (**2d**, 60.4 mg, 0.20 mmol). Silica gel chromatography (eluent: hexane/EtOAc = 60/1) of the crude product afforded the title compound as a light yellow solid (16.4 mg, 20%).

$R_f$  0.42 (hexane/EtOAc = 10/1); m.p. 126.7-129.5 °C;  $^1\text{H}$  NMR (400 MHz,  $\text{CDCl}_3$ ):  $\delta$  7.94 (s, 1H), 7.65 (d,  $J$  = 7.9 Hz, 1H), 7.53 (d,  $J$  = 8.1 Hz, 1H), 7.30-7.27 (m, 2H), 7.24-7.20 (m, 1H), 7.17 (d,  $J$  = 7.2 Hz, 2H), 7.07-7.02 (m, 2H), 6.65 (t,  $J$  = 7.2 Hz, 1H), 6.57 (d,  $J$  = 8.2 Hz, 1H), 5.43-5.41 (m, 1H), 4.63 (d,  $J$  = 17.2 Hz, 1H), 4.08 (d,  $J$  = 17.2 Hz, 1H), 2.69-2.49 (m, 5H),

2.45-2.36 (m, 1H), 2.13-2.07 (m, 1H);  $^{13}\text{C}$  NMR (75 MHz,  $\text{CDCl}_3$ ):  $\delta$  200.2, 148.9, 145.1, 137.9, 137.2, 129.4, 129.3 (q,  $^2J_{\text{C-F}} = 32.8$  Hz), 128.9, 128.7, 128.0 (q,  $^3J_{\text{C-F}} = 3.5$  Hz), 127.6, 126.9, 126.4 (two signals overlapped), 123.6 (q,  $^1J_{\text{C-F}} = 270.8$  Hz), 122.1, 116.2, 110.8, 58.1, 53.3, 29.8, 28.4, 23.7;  $^{19}\text{F}$  NMR (376 MHz,  $\text{CDCl}_3$ ):  $\delta$  -62.6; HRMS (ESI) Calcd for  $\text{C}_{25}\text{H}_{23}\text{NOF}_3$   $[\text{M} + \text{H}]^+$  410.1732, found 410.1732.

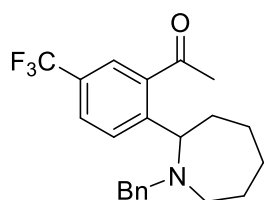

**1-(2-(1-Benzylazepan-2-yl)-5-(trifluoromethyl)phenyl)ethan-1-one (3he):** The typical procedure was applied to (*E*)-*N*-(4-methoxyphenyl)-1-(3-(trifluoromethyl)phenyl)ethan-1-imine (**1h**, 117.3 mg, 0.40 mmol) and 1-(2-bromobenzyl)azepane (**2e**, 53.6 mg, 0.20 mmol). Silica gel chromatography (eluent: hexane/EtOAc = 50/1) of the crude product afforded the title compound as a light yellow oil (48.4 mg, 64%).

$R_f$  0.52 (hexane/EtOAc = 10/1);  $^1\text{H}$  NMR (400 MHz,  $\text{CDCl}_3$ ):  $\delta$  8.13 (d,  $J = 8.6$  Hz, 1H), 7.70-7.68 (m, 2H), 7.25-7.15 (m, 5H), 4.23-4.21 (m, 1H), 3.51 (d,  $J = 13.8$  Hz, 1H), 3.45 (d,  $J = 13.8$  Hz, 1H), 2.99-2.79 (m, 2H), 2.53 (s, 3H), 1.97-1.82 (m, 3H), 1.73-1.47 (m, 5H);  $^{13}\text{C}$  NMR (100 MHz,  $\text{CDCl}_3$ ):  $\delta$  201.6, 151.5, 139.7, 138.7, 129.1, 128.6, 128.3 (q,  $^2J_{\text{C-F}} = 32.3$  Hz), 128.1, 127.2 (q,  $^3J_{\text{C-F}} = 3.3$  Hz), 126.7, 124.3 (q,  $^3J_{\text{C-F}} = 3.7$  Hz), 123.8 (q,  $^1J_{\text{C-F}} = 270.7$  Hz), 64.7, 59.3, 50.3, 35.4, 30.3, 29.1, 27.2, 26.4;  $^{19}\text{F}$  NMR (376 MHz,  $\text{CDCl}_3$ ):  $\delta$  -62.5; HRMS (ESI) Calcd for  $\text{C}_{22}\text{H}_{25}\text{NOF}_3$   $[\text{M} + \text{H}]^+$  376.1888, found 376.1885.

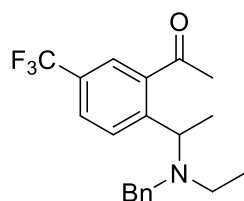

**1-(2-(1-(Benzyl(ethyl)amino)ethyl)-5-(trifluoromethyl)phenyl)ethan-1-one (3hf):** The typical procedure was applied to (*E*)-*N*-(4-methoxyphenyl)-1-(3-(trifluoromethyl)phenyl)ethan-1-imine (**1h**, 117.3 mg, 0.40 mmol) and *N*-(2-bromobenzyl)-*N*-ethylethanamine (**2f**, 48.4 mg, 0.20 mmol). Silica gel chromatography (eluent: hexane/EtOAc = 30/1) of the crude product afforded the title compound as a light yellow oil (40.5 mg, 58%).

$R_f$  0.42 (hexane/EtOAc = 10/1);  $^1\text{H}$  NMR (500 MHz,  $\text{CDCl}_3$ ):  $\delta$  7.80 (d,  $J$  = 8.1 Hz, 1H), 7.65 (d,  $J$  = 8.3 Hz, 1H), 7.62 (s, 1H), 7.28-7.19 (m, 5H), 4.50 (q,  $J$  = 6.6 Hz, 1H), 3.52 (d,  $J$  = 17.3 Hz, 1H), 3.45 (d,  $J$  = 17.2 Hz, 1H), 2.62-2.45 (m, 5H), 1.37 (d,  $J$  = 6.5 Hz, 3H), 0.88 (t,  $J$  = 6.9 Hz, 3H);  $^{13}\text{C}$  NMR (100 MHz,  $\text{CDCl}_3$ ):  $\delta$  202.4, 148.7, 141.1, 139.9, 128.7 (two signals overlapped), 128.2, 128.1, 126.8, 126.7 (q,  $^3J_{\text{C-F}}$  = 3.7 Hz), 123.8 (q,  $^1J_{\text{C-F}}$  = 270.7 Hz), 123.4 (q,  $^3J_{\text{C-F}}$  = 3.7 Hz), 55.2, 54.3, 43.6, 30.5, 16.2, 11.0;  $^{19}\text{F}$  NMR (376 MHz,  $\text{CDCl}_3$ ):  $\delta$  -62.5; HRMS (ESI) Calcd for  $\text{C}_{20}\text{H}_{23}\text{NOF}_3$   $[\text{M} + \text{H}]^+$  350.1732, found 350.1729.

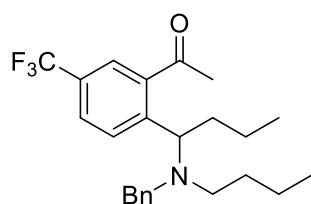

**1-(2-(1-(Benzyl(butyl)amino)butyl)-5-(trifluoromethyl)phenyl)ethan-1-one (3hg):** The typical procedure was applied to (*E*)-*N*-(4-methoxyphenyl)-1-(3-(trifluoromethyl)phenyl)ethan-1-imine (**1h**, 117.3 mg, 0.40 mmol) and *N*-(2-bromobenzyl)-*N*-butylbutan-1-amine (**2g**, 59.7 mg, 0.20 mmol). Silica gel chromatography (eluent: hexane/EtOAc = 60/1) of the crude product afforded the title compound as a light yellow oil (35.7 mg, 44%).

$R_f$  0.65 (hexane/EtOAc = 10/1);  $^1\text{H}$  NMR (400 MHz,  $\text{d}_6$ -acetone):  $\delta$  7.94 (s, 1H), 7.90 (d,  $J$  = 8.2 Hz, 1H), 7.80 (d,  $J$  = 8.2 Hz, 1H), 7.28-7.19 (m, 5H), 4.53 (dd,  $J$  = 8.8, 5.5 Hz, 1H), 3.69 (d,  $J$  = 13.9 Hz, 1H), 3.42 (d,  $J$  = 13.9 Hz, 1H), 2.62 (s, 3H), 2.57-2.50 (m, 1H), 2.36-2.29 (m, 1H), 2.03-1.94 (m, 1H), 1.89-1.80 (m, 1H), 1.39-1.04 (m, 6H), 0.91 (t,  $J$  = 7.3 Hz, 3H), 0.75 (t,  $J$  = 7.3 Hz, 3H);  $^{13}\text{C}$  NMR (100 MHz,  $\text{CDCl}_3$ ):  $\delta$  202.3, 145.8, 142.1, 140.3, 128.8, 128.6 (q,  $^2J_{\text{C-F}}$  = 32.7 Hz), 128.5, 128.1, 126.7, 126.4 (q,  $^3J_{\text{C-F}}$  = 3.7 Hz), 123.8 (q,  $^1J_{\text{C-F}}$  = 270.3 Hz), 123.6 (q,  $^3J_{\text{C-F}}$  = 3.7 Hz), 59.1, 54.7, 50.0, 32.8, 30.6, 28.7, 20.5, 19.8, 14.3, 13.9;  $^{19}\text{F}$  NMR (376 MHz,  $\text{CDCl}_3$ ):  $\delta$  -62.6; HRMS (ESI) Calcd for  $\text{C}_{24}\text{H}_{31}\text{NOF}_3$   $[\text{M} + \text{H}]^+$  406.2358, found 406.2361.

### Transformation of Product 3aa

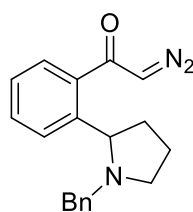

**1-(2-(1-Benzylpyrrolidin-2-yl)phenyl)-2-diazoethan-1-one (9):** To a solution of LiHMDS (1.0 M, 2.49 mL) in 5.0 mL THF was added 1-(2-(1-benzylpyrrolidin-2-yl)phenyl)ethan-1-one (**3aa**, 642 mg, 2.30 mmol) in THF (4.6 mL) over 1 min at  $-78^{\circ}\text{C}$ . The resulting mixture was stirred at the same temperature for 30 min, followed by the addition of trifluoroethyl trifluoroacetate (541.1 mg, 2.76 mmol) over 2-3 min. After additional stirring for 3 h, the reaction mixture was allowed to warm to room temperature, stirred overnight and then poured into a separatory funnel together with  $\text{Et}_2\text{O}$  (20 mL) and sat.  $\text{NH}_4\text{Cl}$  (20 mL). The aqueous layer was extracted with  $\text{Et}_2\text{O}$  (3 x 10 mL). The combined organic layer was washed with brine, dried over  $\text{MgSO}_4$ , and concentrated under reduced pressure to afford a yellow oil. The oil was placed in a dry 50 mL 3-necked round-bottomed flask under a nitrogen atmosphere and dissolved in acetonitrile (9.3 mL). To this solution was added water (0.02 mL) and  $\text{NEt}_3$  (0.23 mL), followed by the dropwise addition of *p*-acetamidobenzenesulfonyl azide (402.5 mg, 1.68 mmol) in acetonitrile (9.3 mL). The resulting solution was stirred at ambient temperature for 24 h, and then poured into a separatory funnel with  $\text{Et}_2\text{O}$  (20 mL). The organic layer was washed with 5%  $\text{NaOH}$  aqueous solution (3 x 10 mL), water (3 x 10 mL), and brine. The combined organic layer was dried over  $\text{MgSO}_4$  and concentrated under reduced pressure. The crude product was purified by silica gel chromatography (eluent: hexane/ $\text{EtOAc}$  = 8/1-1/1) to afford the desired product as a yellow oil (127.4 mg, 32 % based on recovered **3aa**) along with recovery of **3aa** (275.3 mg).

$R_f$  0.67 (hexane/ $\text{EtOAc}$  = 1/1);  $^1\text{H}$  NMR (400 MHz,  $\text{CDCl}_3$ ):  $\delta$  8.01 (d,  $J$  = 7.8 Hz, 1H), 7.49 (t,  $J$  = 7.5 Hz, 1H), 7.35-7.19 (m, 7H), 5.59 (brs, 1H), 3.85 (brs, 1H), 3.79 (d,  $J$  = 13.1 Hz, 1H), 3.11-3.06 (m, 2H), 2.44-2.35 (m, 1H), 2.21 (q,  $J$  = 8.9 Hz, 1H), 1.89-1.61 (m, 3H);  $^{13}\text{C}$  NMR (100 MHz,  $\text{CD}_3\text{CN}$ ):  $\delta$  191.2, 143.9, 140.7, 139.8, 132.1, 129.5 (2C), 129.1 (2C), 128.6, 127.7, 127.5, 66.0, 58.9, 54.0, 36.3, 23.4; HRMS (ESI) Calcd for  $\text{C}_{19}\text{H}_{20}\text{N}_3\text{O}$   $[\text{M} + \text{H}]^+$  306.1606, found 306.1602.



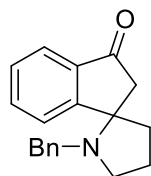

**1'-Benzylspiro[indene-1,2'-pyrrolidin]-3(2H)-one (10):** A solution of 1-(2-(1-benzylpyrrolidin-2-yl)phenyl)-2-diazoethan-1-one (**9**, 127.4 mg, 0.42 mmol) in dichloromethane (20 mL) was added dropwise to a suspension of  $\text{Rh}_2(\text{OAc})_4$  in dichloromethane (9.3 mg, 0.02 mmol, 42 mL) at room temperature over a period of 6 h using a syringe pump. The resulting mixture was stirred for additional 20 h and then concentrated under reduced pressure. The crude product was purified by silica gel chromatography (eluent: hexane/EtOAc = 12/1) to afford the desired product as a light yellow oil (78.7 mg, 68 %).

$R_f$  0.24 (hexane/EtOAc = 10/1);  $^1\text{H}$  NMR (400 MHz,  $\text{CDCl}_3$ ):  $\delta$  7.75 (t,  $J$  = 7.1 Hz, 2H), 7.68 (t,  $J$  = 7.4 Hz, 1H), 7.44 (t,  $J$  = 7.3 Hz, 1H), 7.30-7.21 (m, 5H), 3.35 (d,  $J$  = 13.0 Hz, 1H), 3.17-3.09 (m, 2H), 2.93 (d,  $J$  = 18.7 Hz, 1H), 2.51-2.47 (m, 2H), 2.28-2.21 (m, 1H), 2.08-1.90 (m, 3H);  $^{13}\text{C}$  NMR (100 MHz,  $\text{CD}_3\text{CN}$ ):  $\delta$  204.7, 159.1, 140.9, 138.5, 136.1, 129.7, 129.2, 129.1, 127.7, 126.0, 123.2, 70.5, 53.7, 51.9, 43.1, 42.1, 22.4; HRMS (ESI) Calcd for  $\text{C}_{19}\text{H}_{20}\text{NO}$   $[\text{M} + \text{H}]^+$  278.1545, found 278.1545.

## Reference

- (1) (a) N. Mrcic, L. Panella, A. J. Minnaard, B. L. Feringa, J. G. de Vries, *J. Am. Chem. Soc.* **2009**, *131*, 8358. (b) F.-M. Gautier, S. Jones, S. J. Martin, *Org. Biomol. Chem.* **2009**, *7*, 229.
- (2) **1a:** (a) J. S. M. Samec, A. H. Ell, J.-E. Bäckvall, *Chem. Eur. J.* **2005**, *11*, 2327. **1b:** (b) K. Kutlescha, G. T. Venkanna, R. Kempe, *Chem. Commun.* **2011**, *47*, 4183. **1c, 1f:** (c) T. Imamoto, N. Iwadate, K. Yoshida, *Org. Lett.* **2006**, *8*, 2289. **1d, 1g:** (d) C. Moessner, C. Bolm, *Angew. Chem., Int. Ed.* **2005**, *44*, 7564. **1e, 1h:** K. Gao, N. Yoshikai, *Angew. Chem., Int. Ed.* **2011**, *50*, 6888. **1i, 1k, 1l:** N. Yoshikai, A. Matsumoto, J. Norinder, E. Nakamura, *Angew. Chem., Int. Ed.* **2009**, *48*, 2925. **1j:** P.-S. Lee, T. Fujita, N. Yoshikai, *N. J. Am. Chem. Soc.* **2011**, *133*, 17283.
- (3) Z. Li, H.-J. Feiten, J. B. van Beilen, W. Duetz, B. Witholt, *Tetrahedron: Asymmetry* **1999**, *10*, 1323.
- (4) K. P. Bhabak, G. Mugesh, *Chem. Eur. J.* **2008**, *14*, 8640.
- (5) S. R. Wilson, P. A. Zucker, R.-R. C. Huang, A. Spector, *J. Am. Chem. Soc.* **1989**, *111*, 5936.
- (6) A. G. Avent, P. B. Hitchcock, G. J. Leigh, M. Togrou, *J. Organomet. Chem.* **2003**, *669*, 87.
- (7) K. C. Majumdar, A. Taher, P. Debnath, *Synthesis* **2009**, *5*, 793.
- (8) L. Soran, V. Coman, A. Soran, C. Silvestru, *Centr. Eur. J. Chem.* **2004**, *2*, 563.

# NMR Spectra

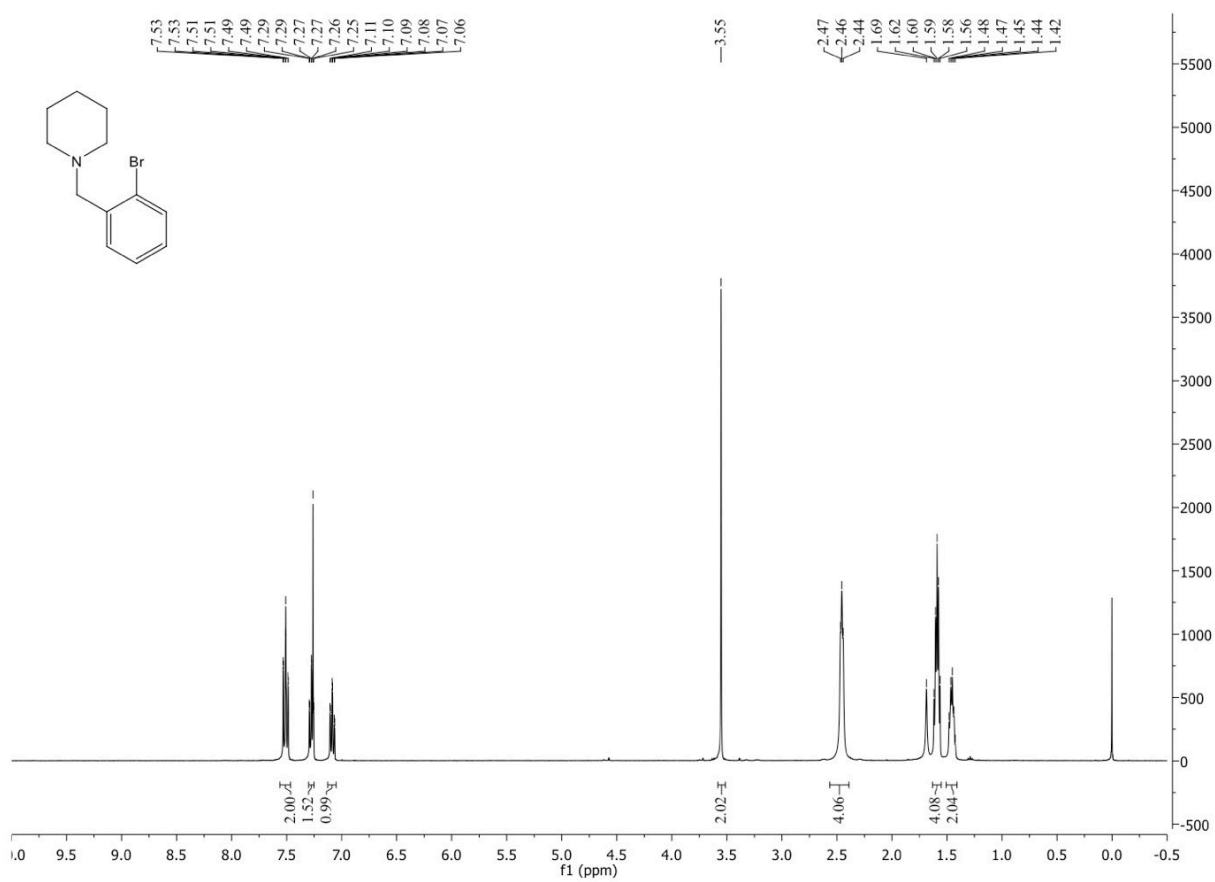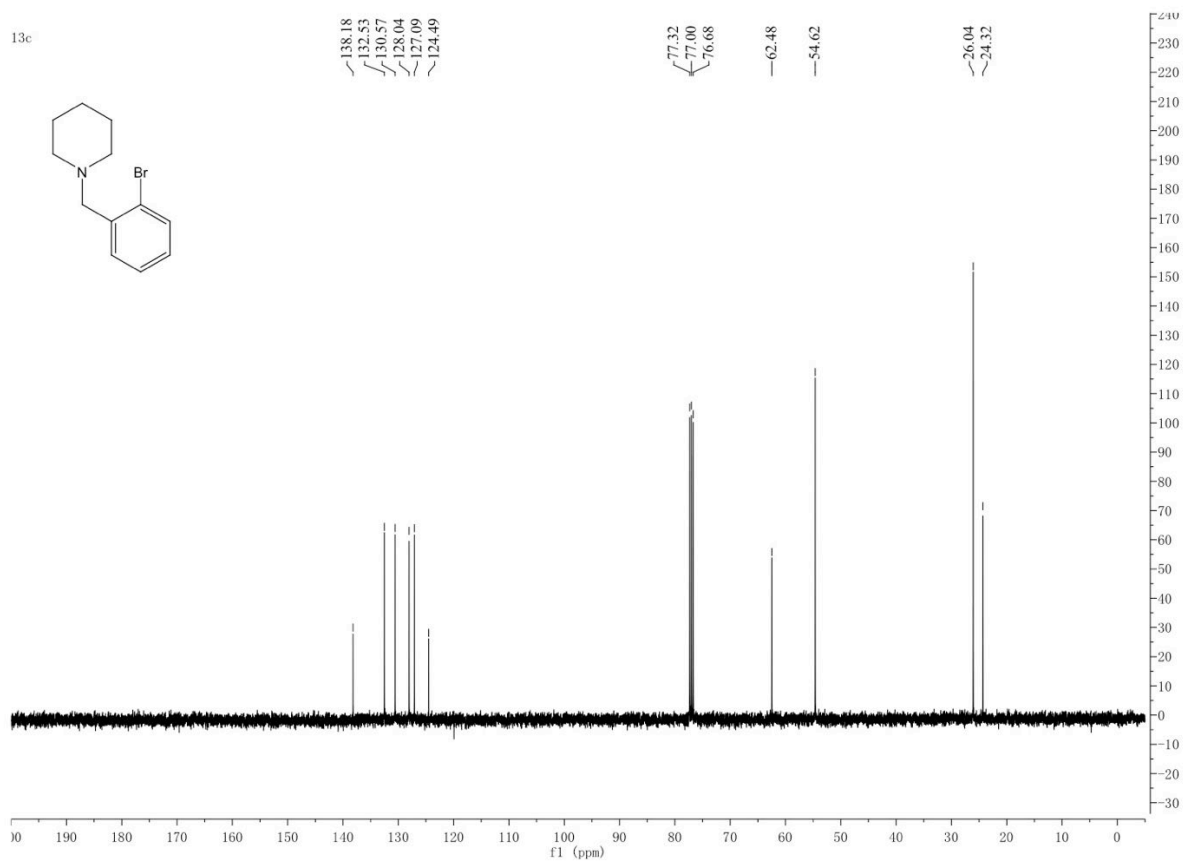

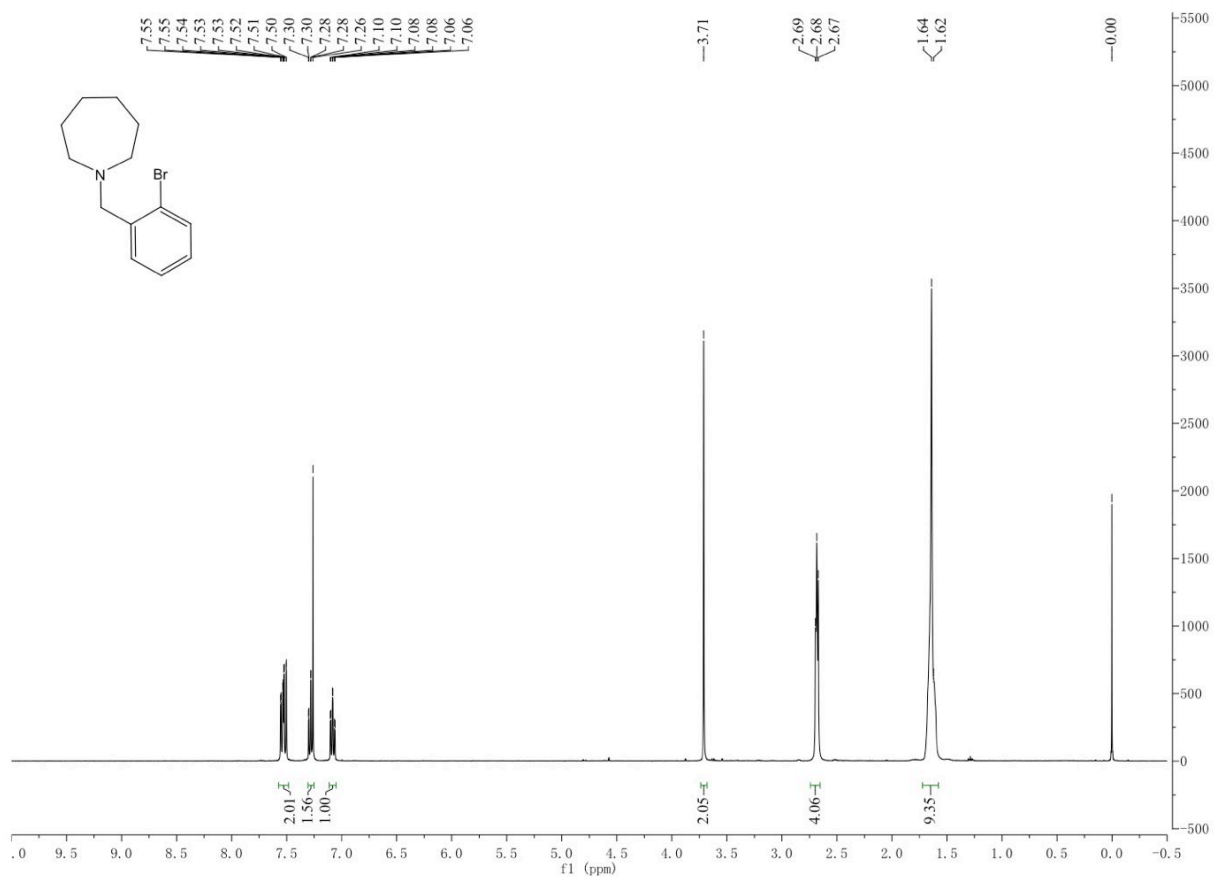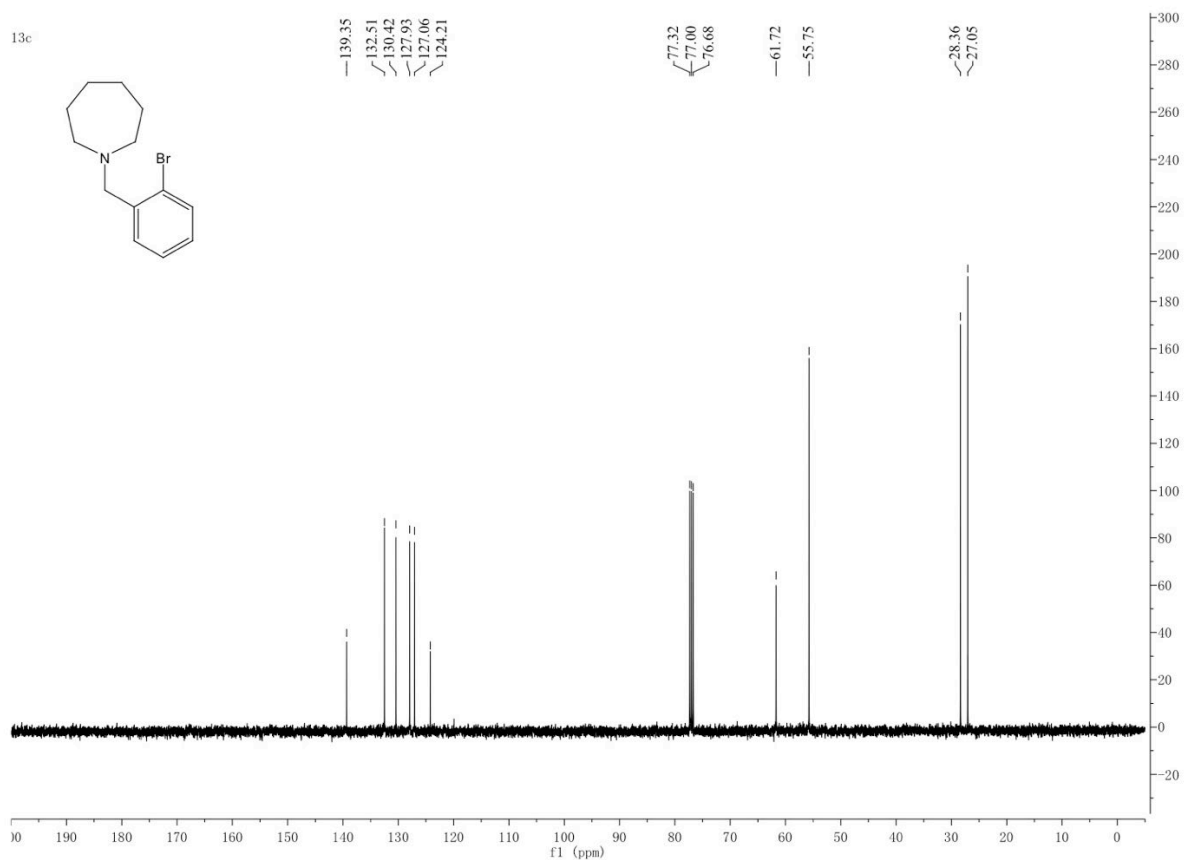

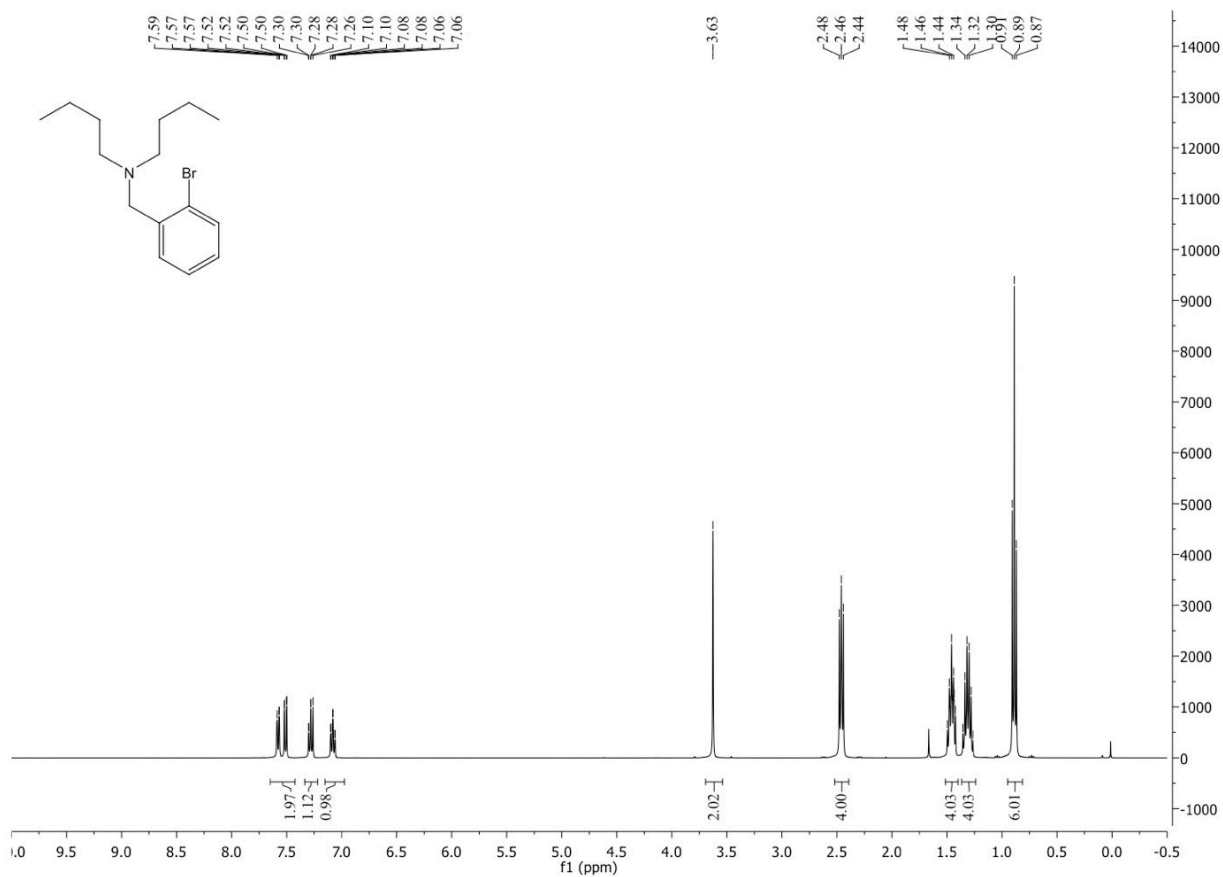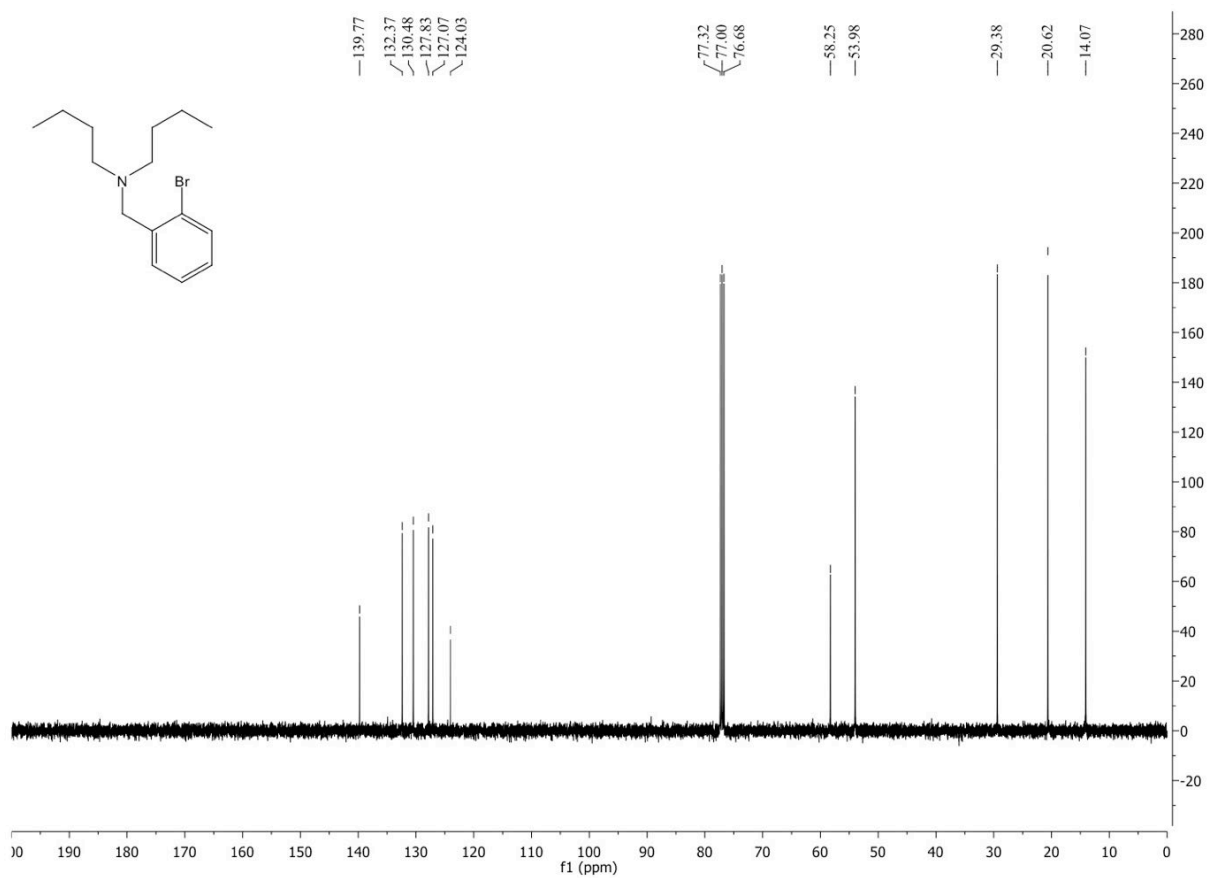

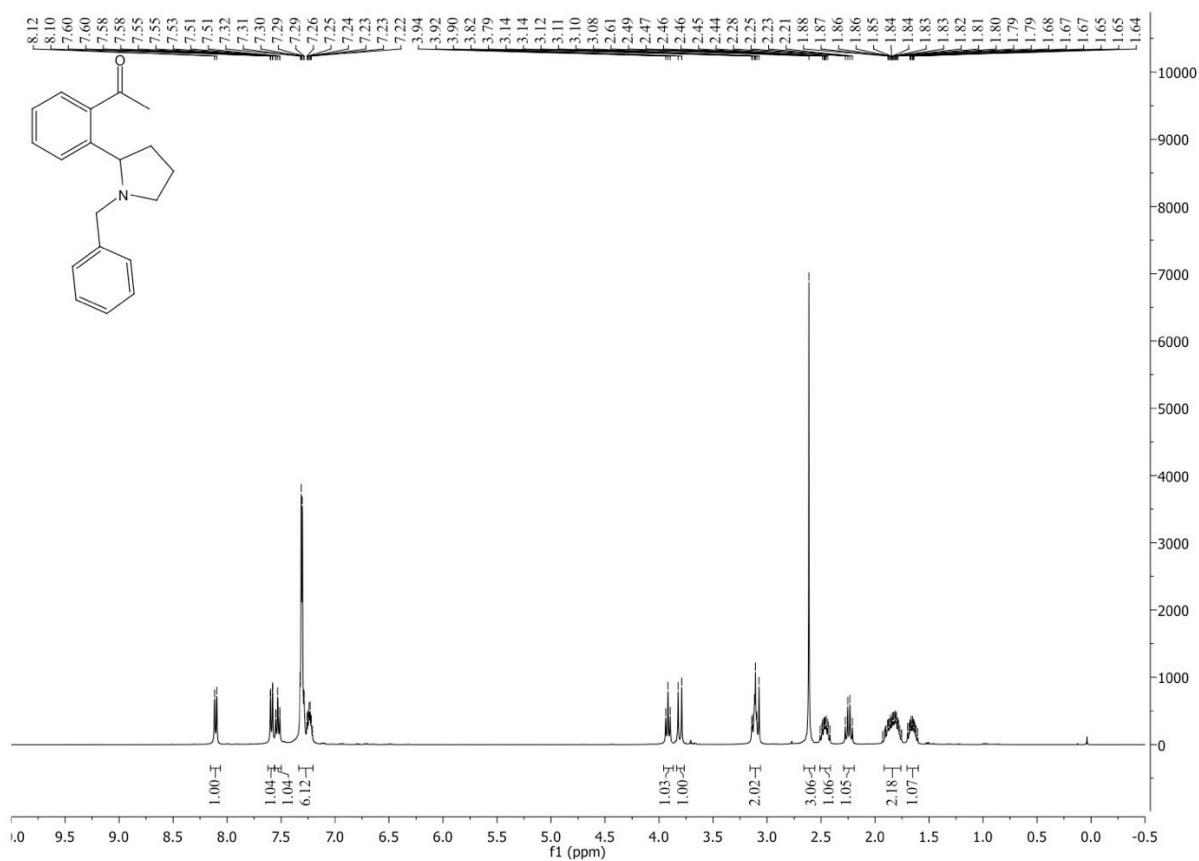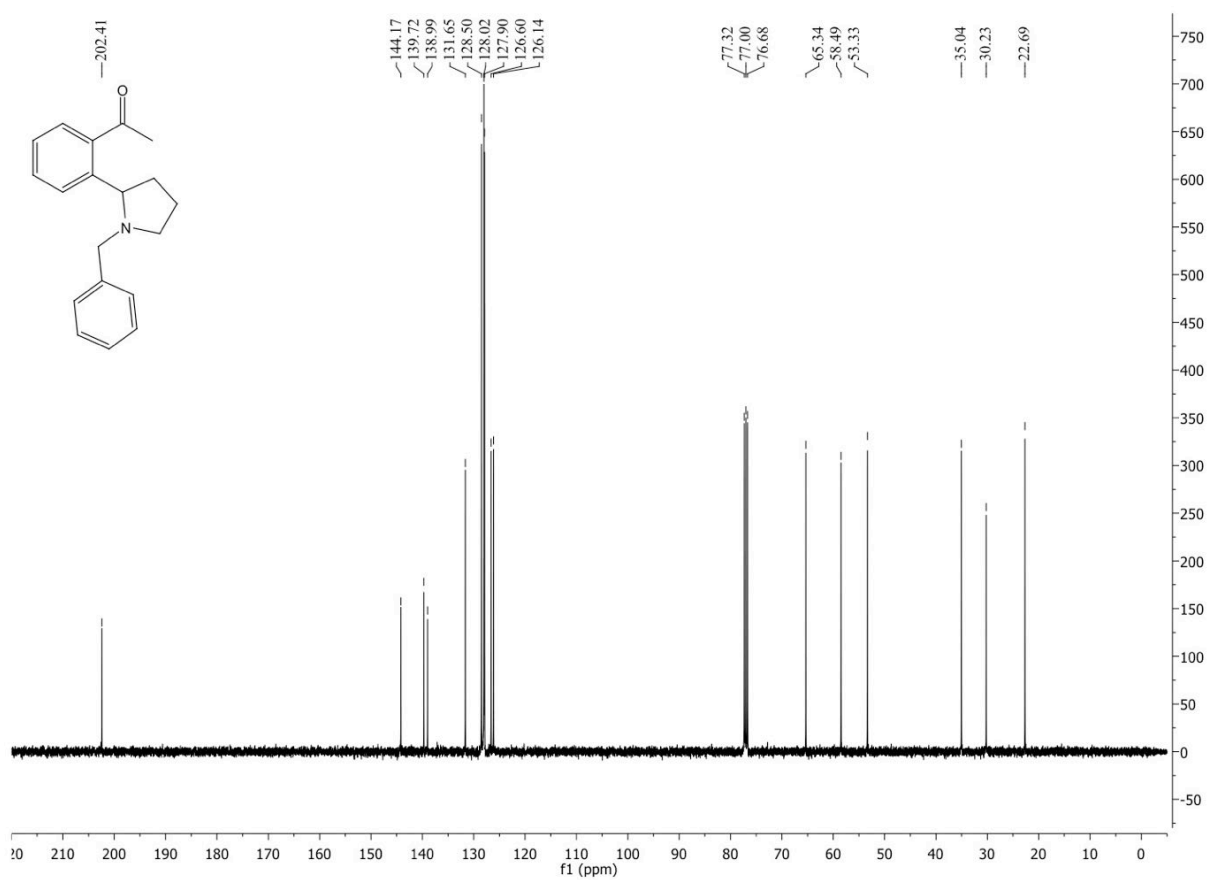

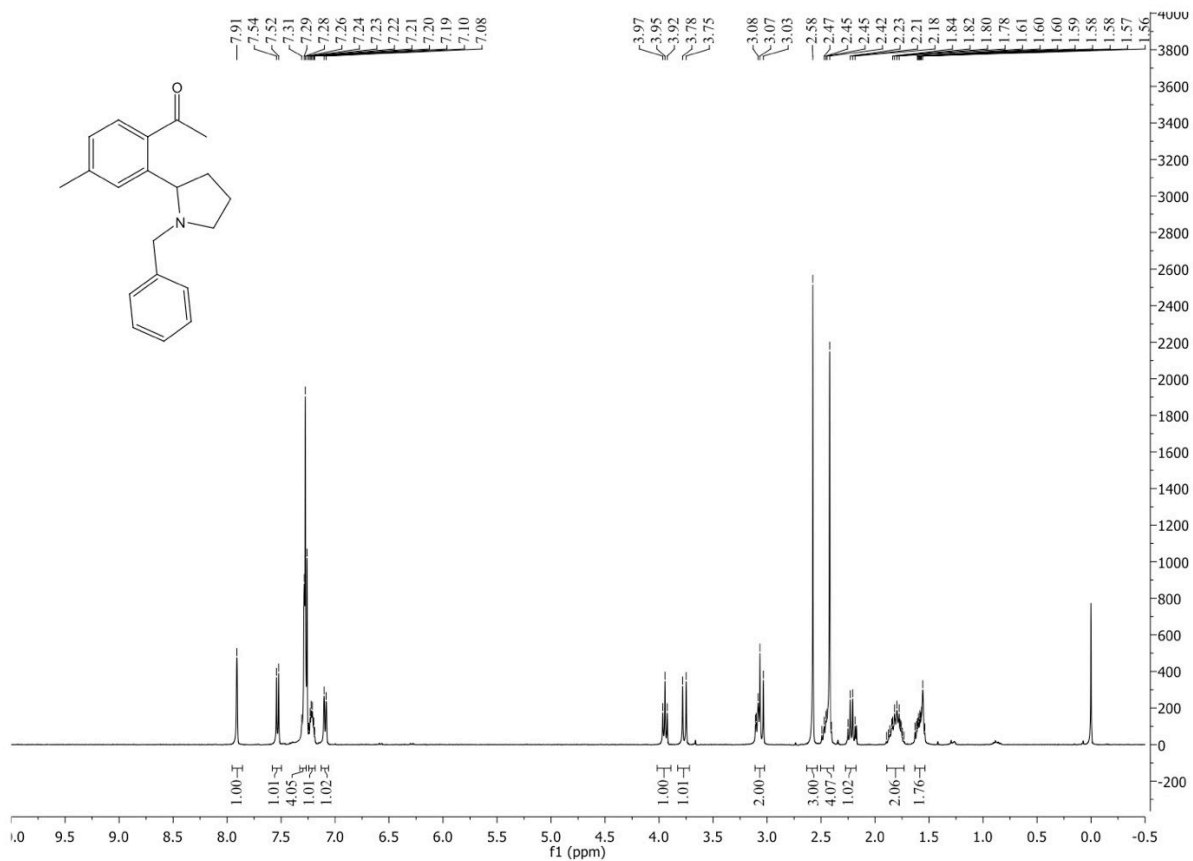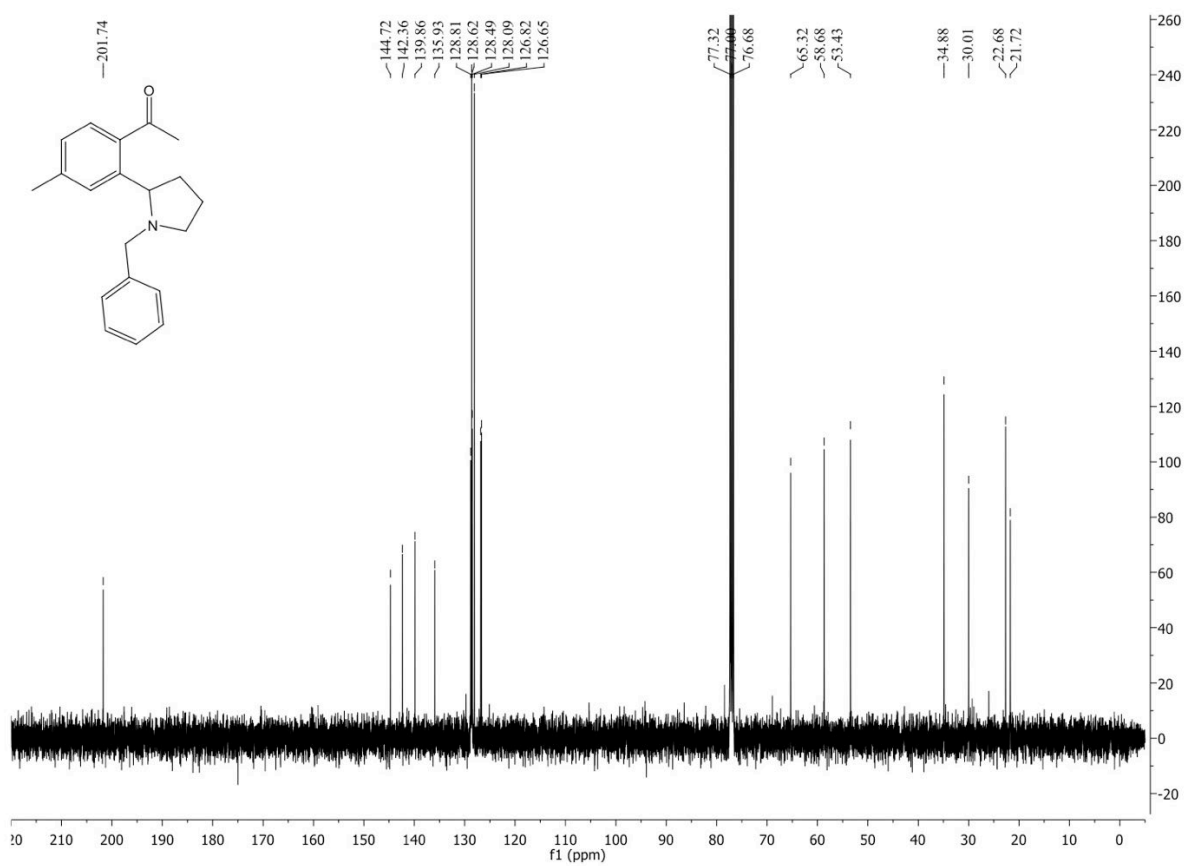

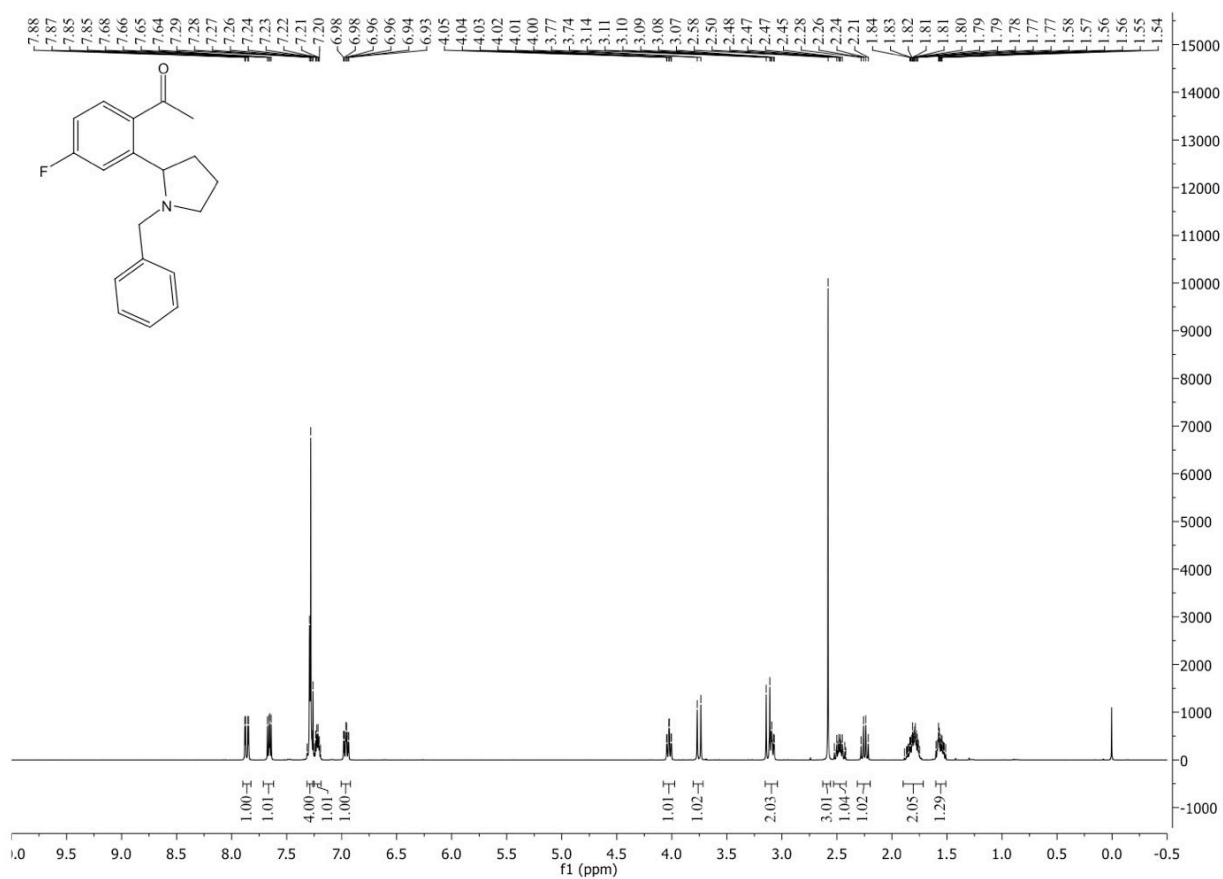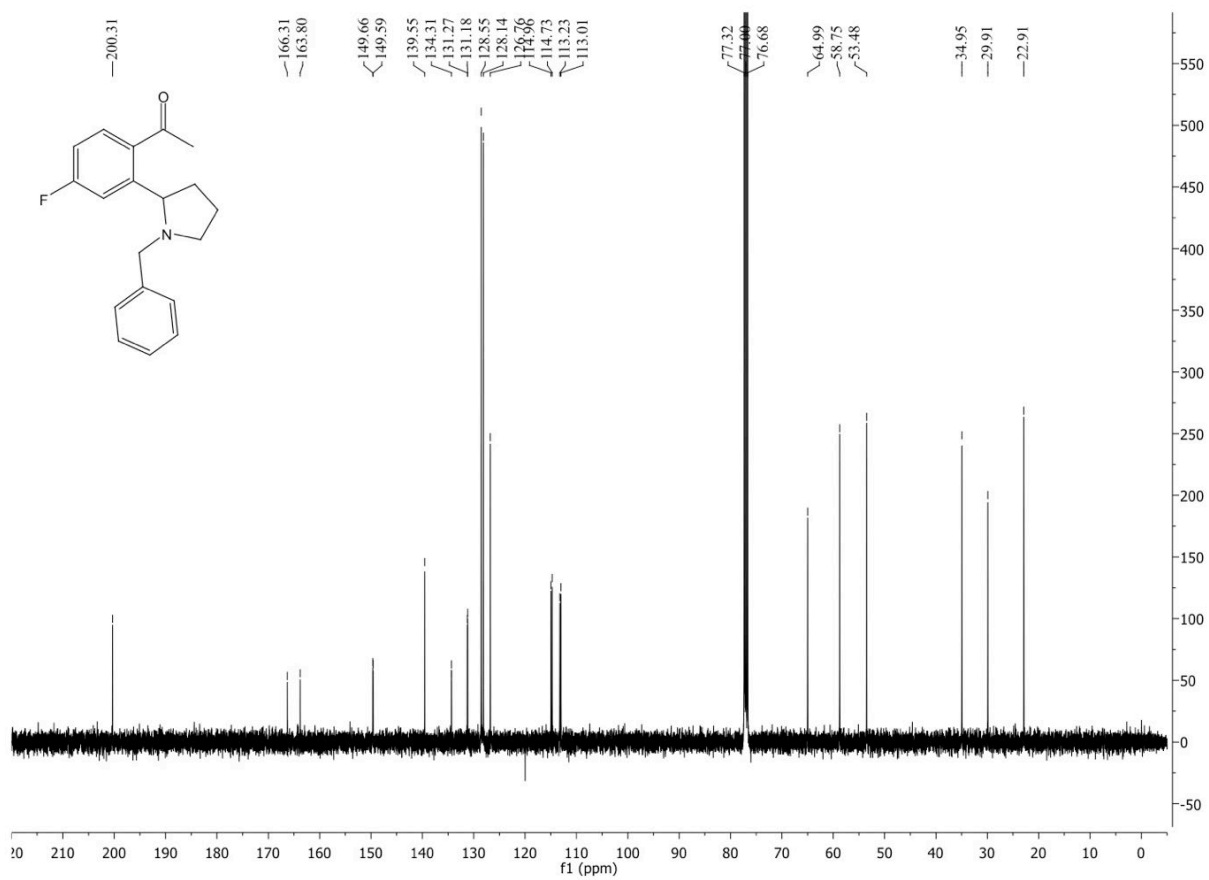



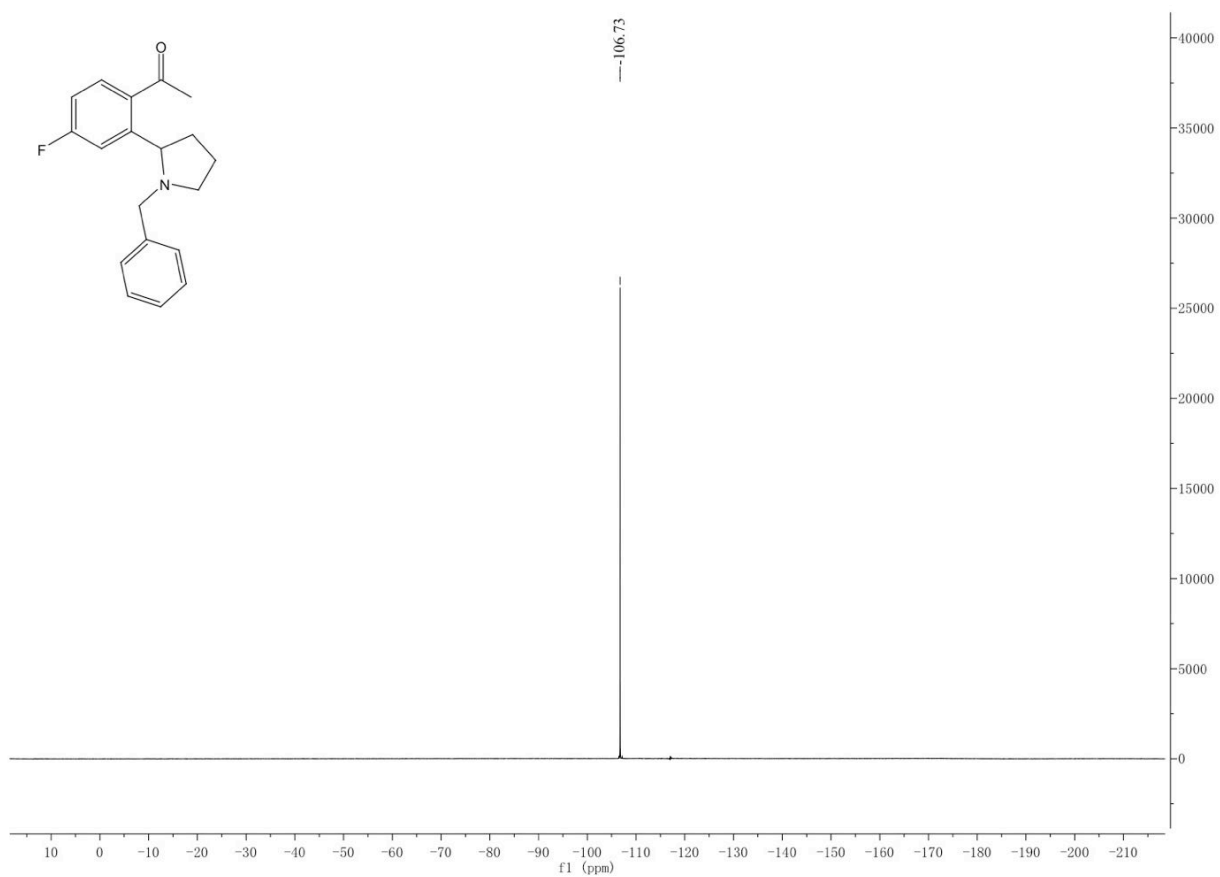

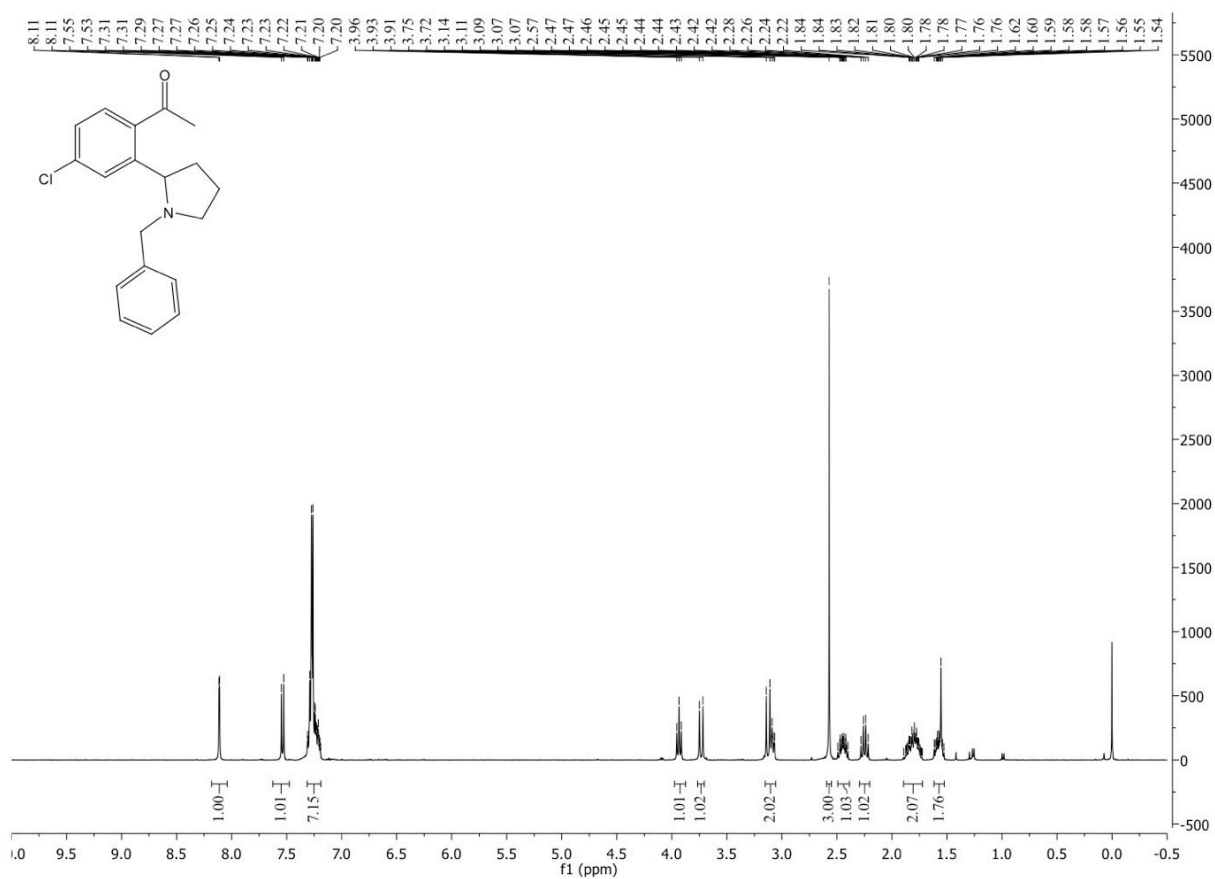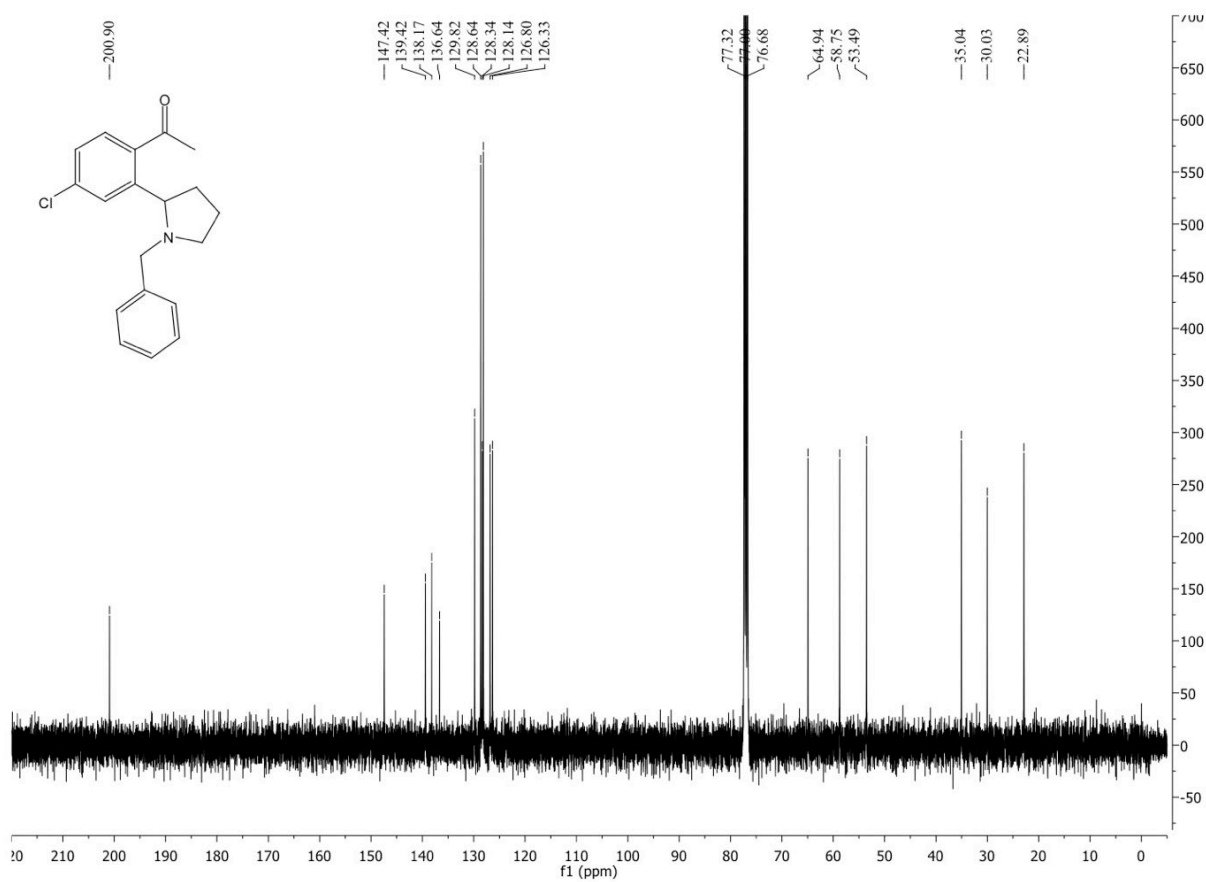

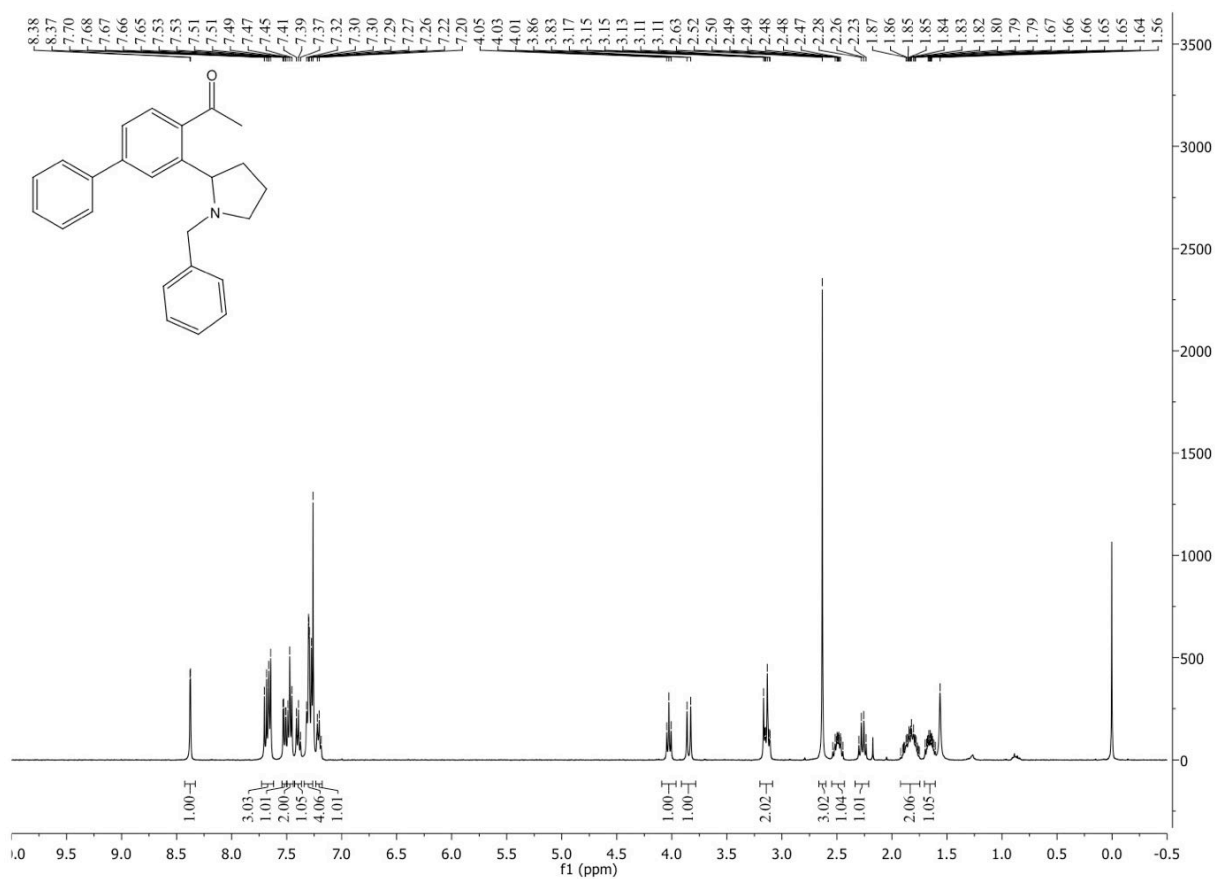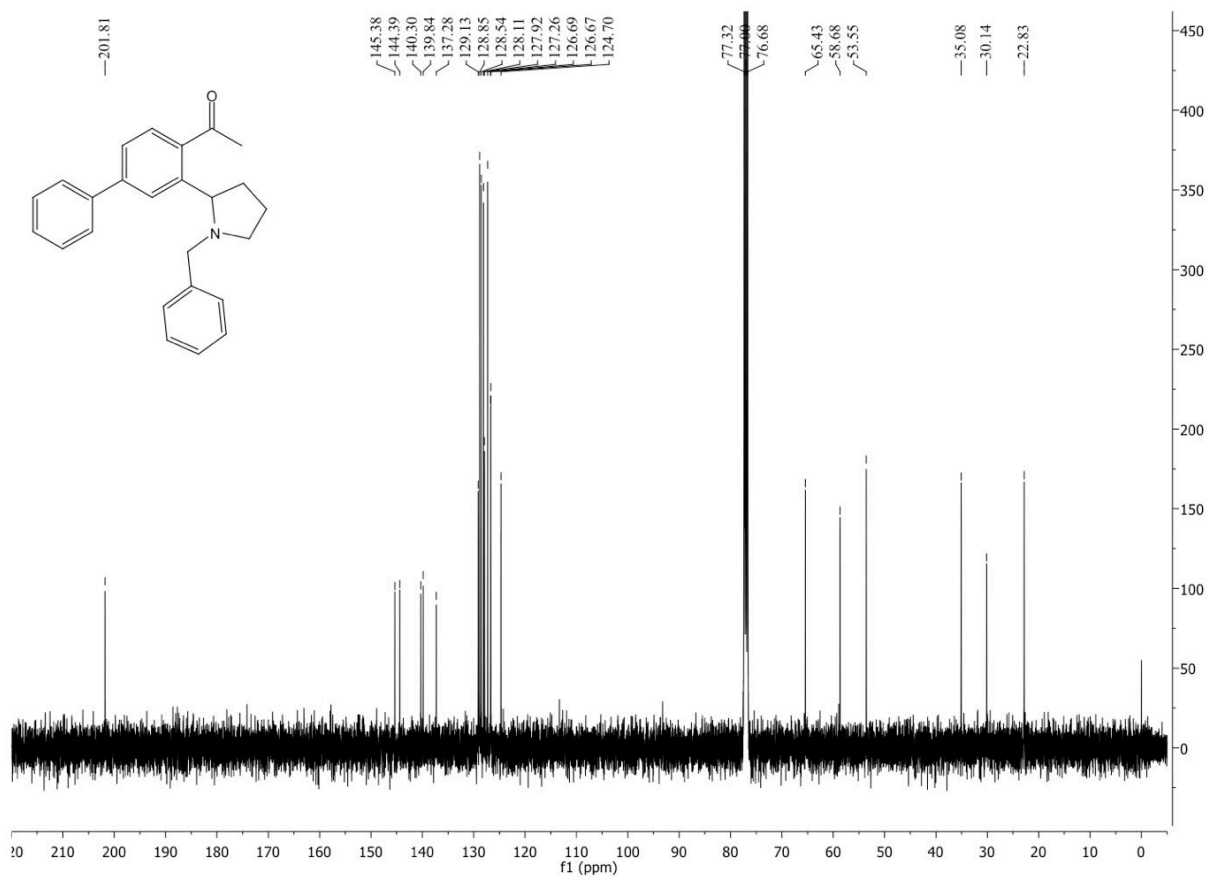

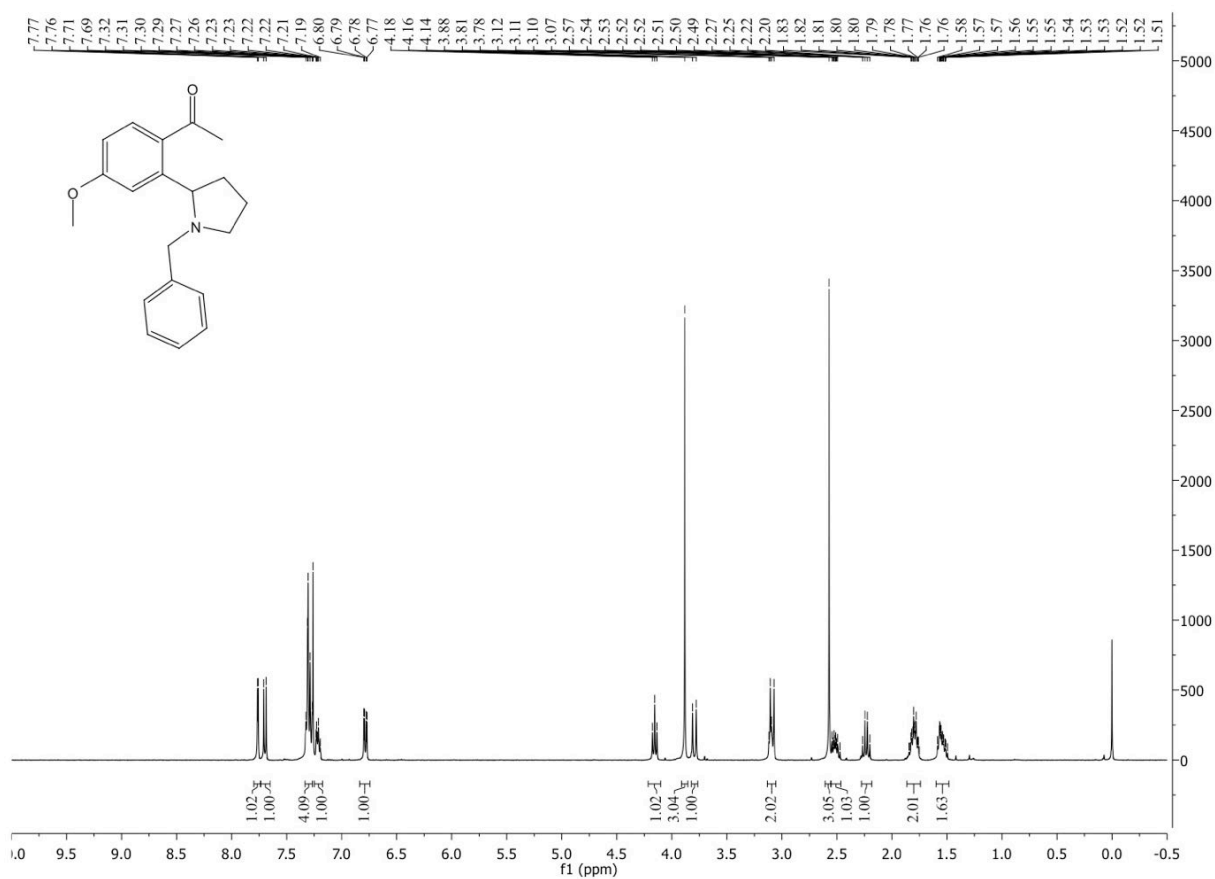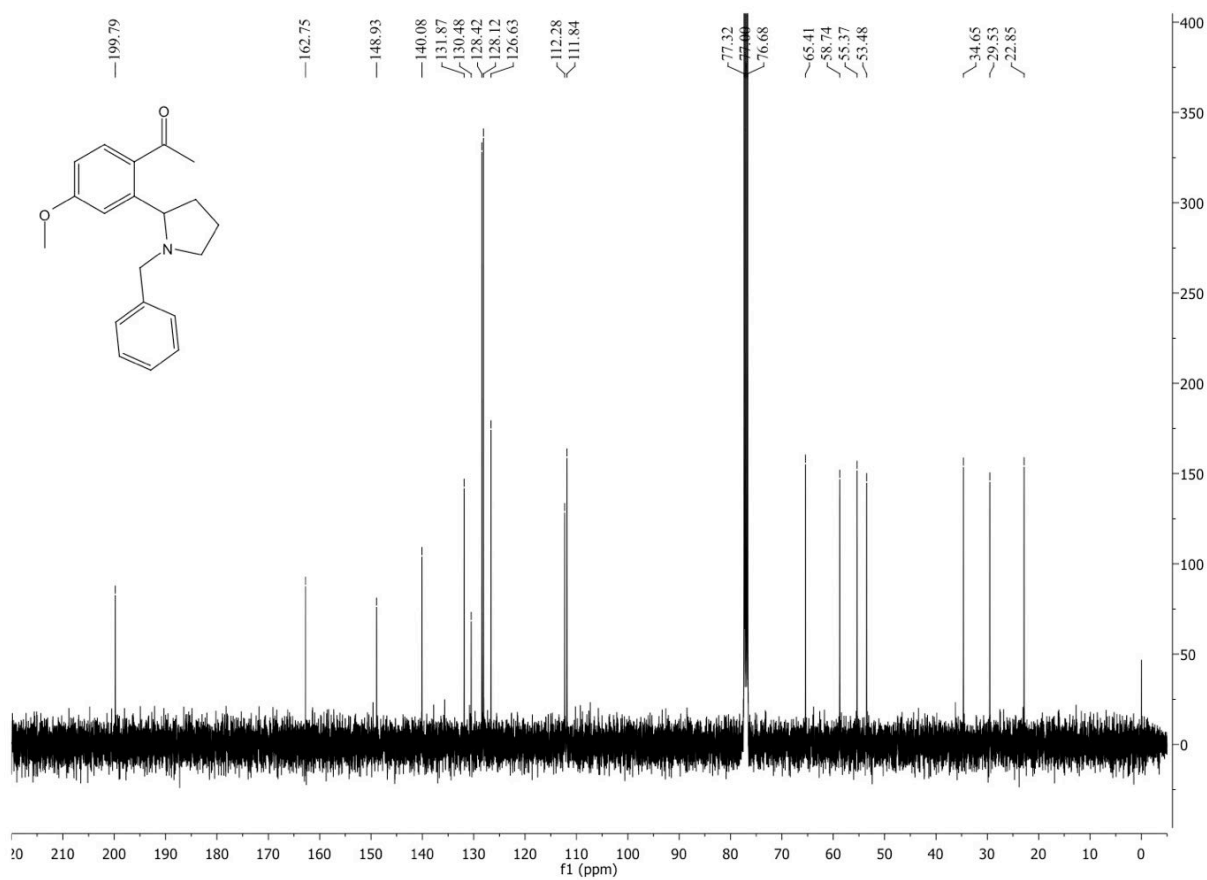

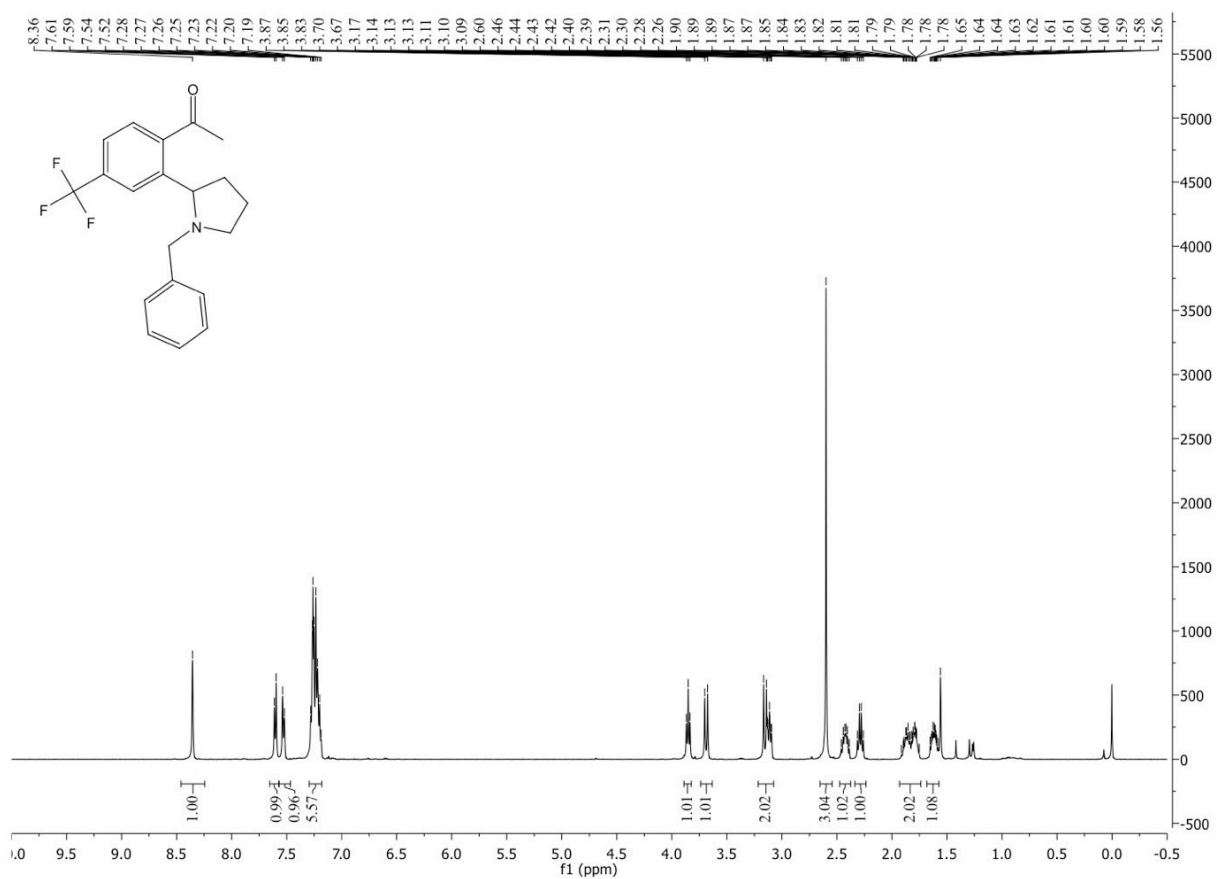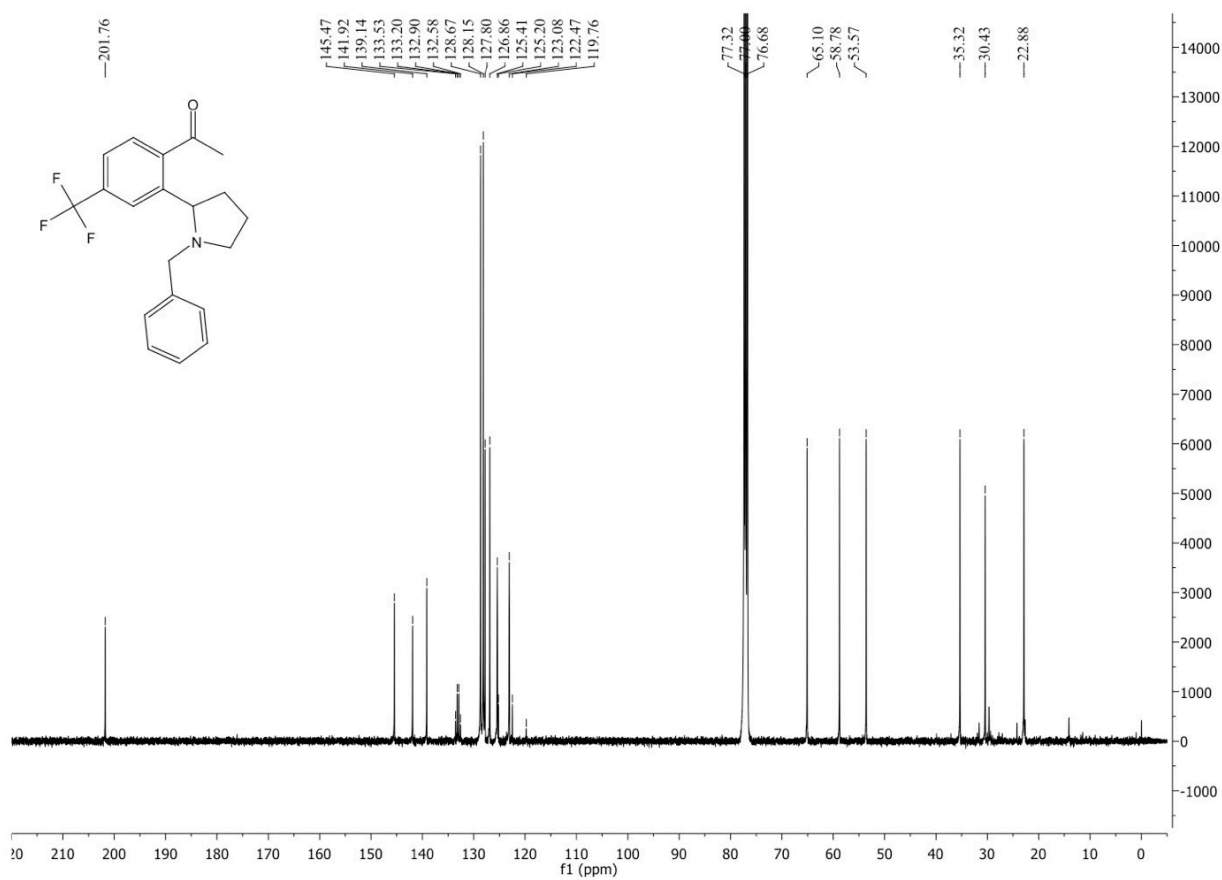

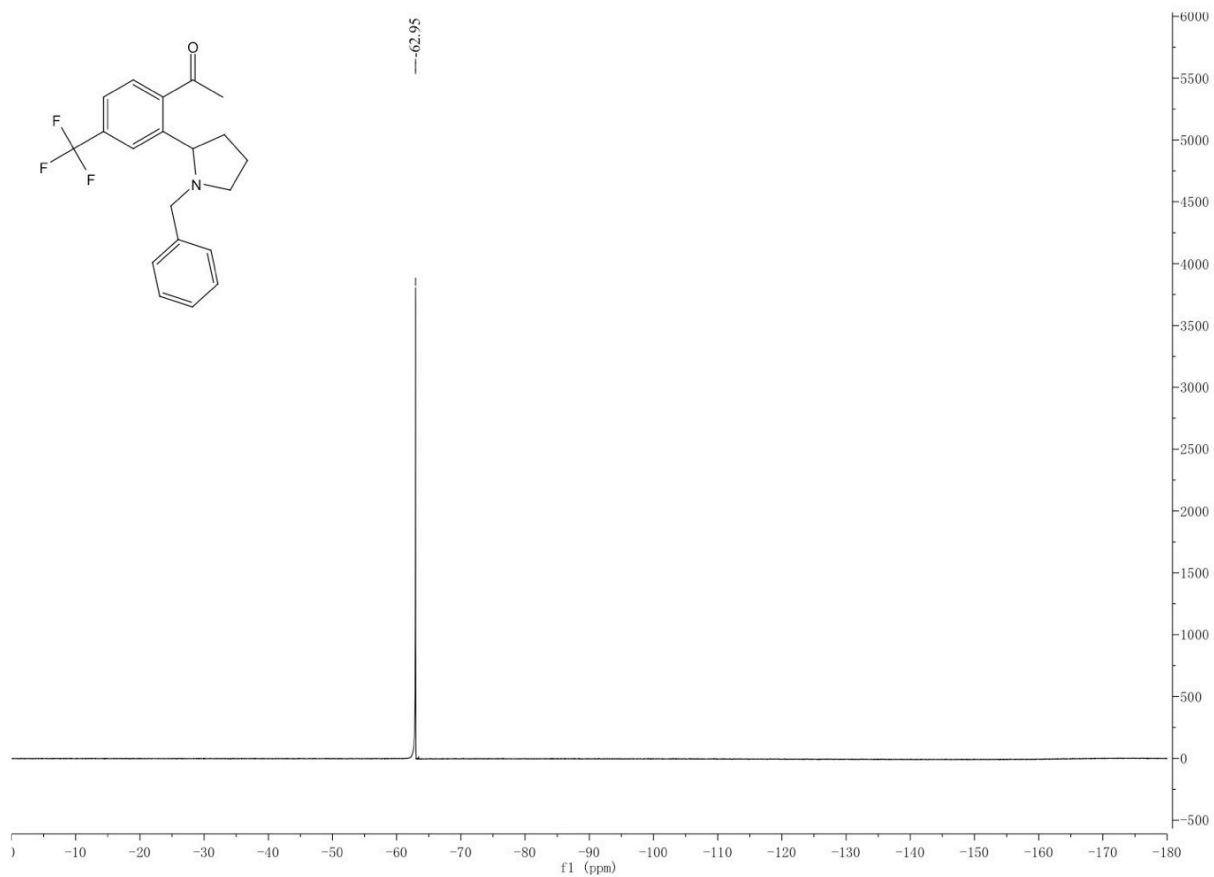

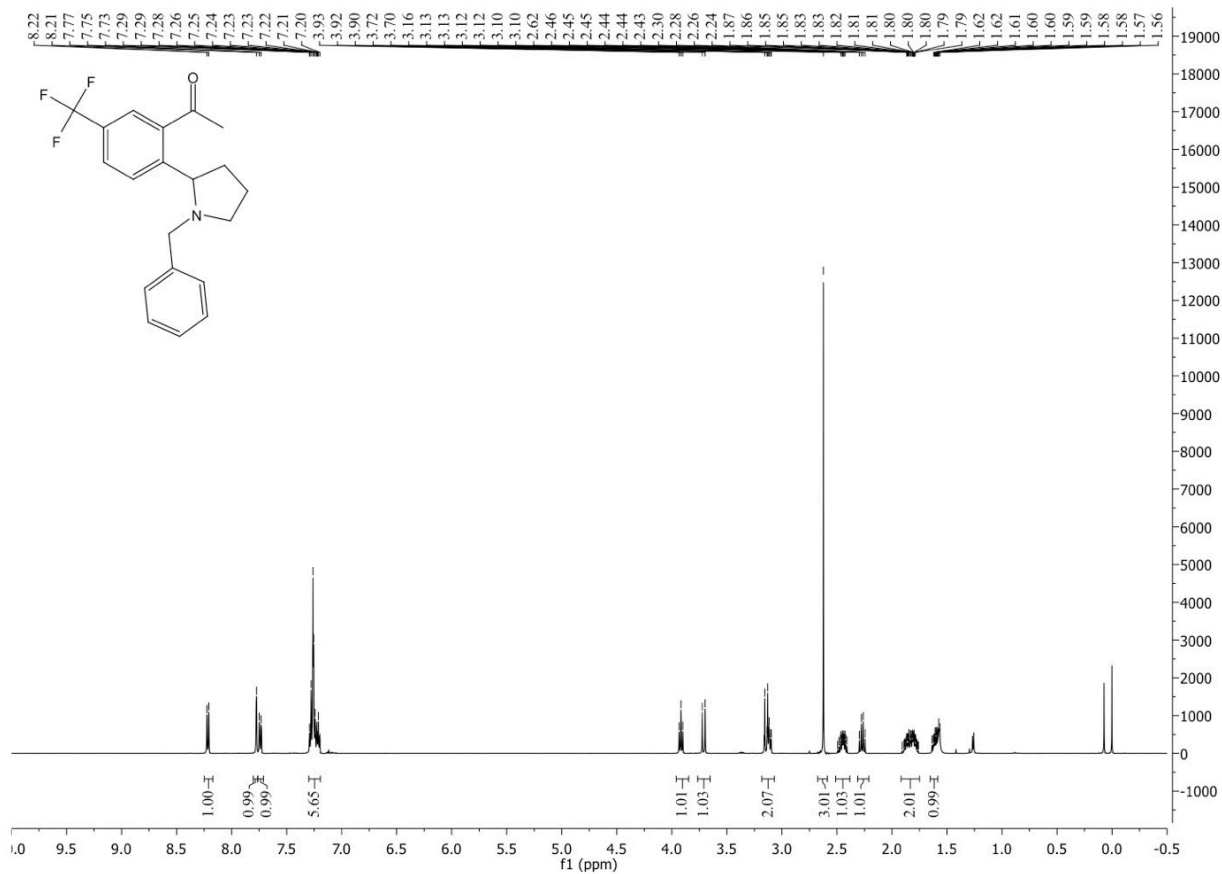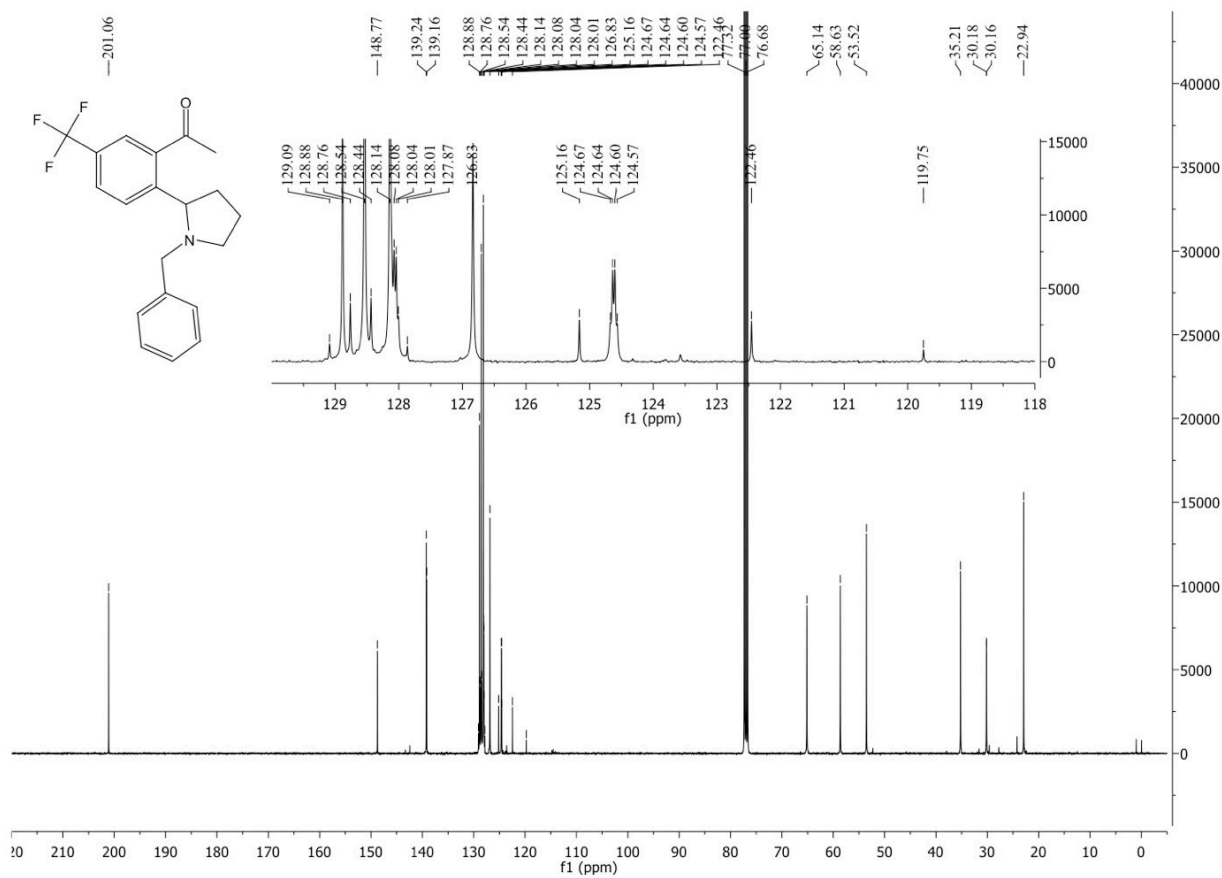

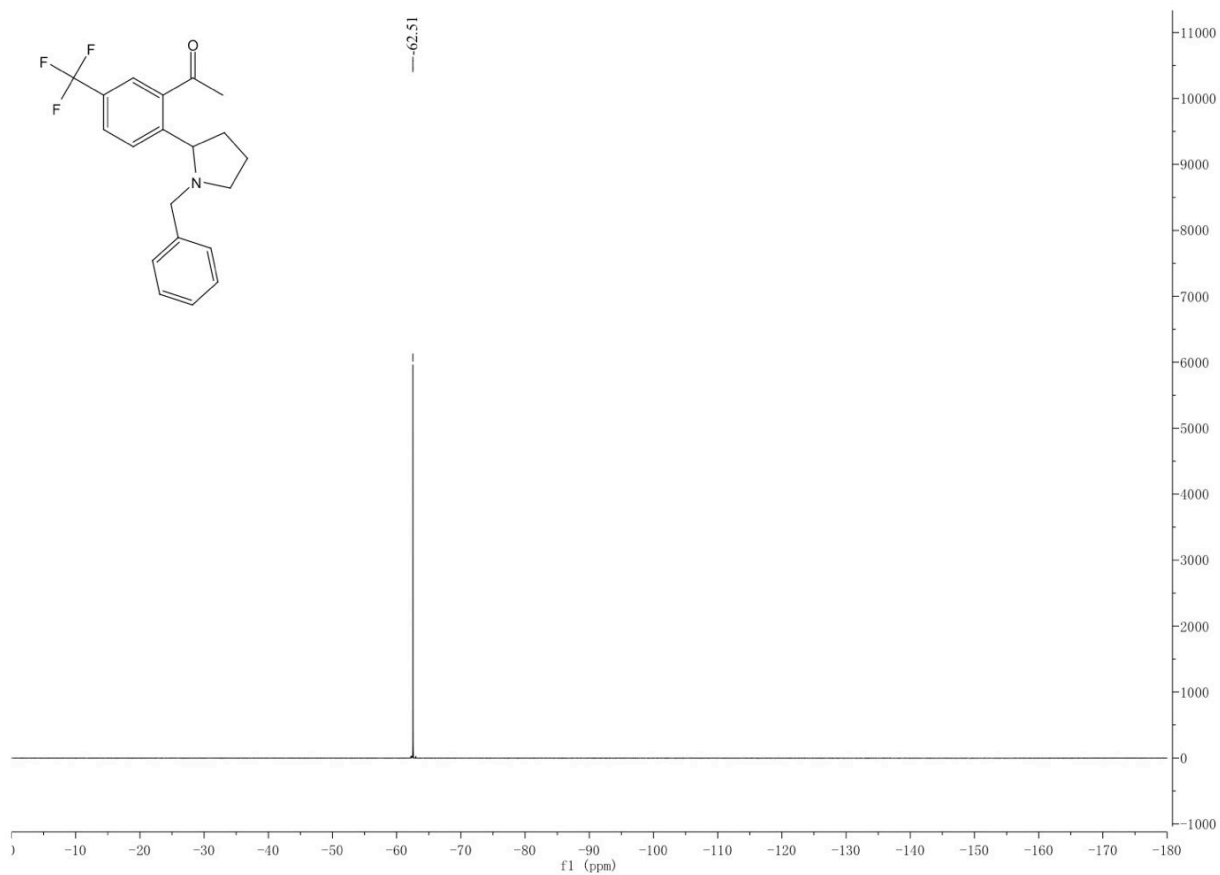



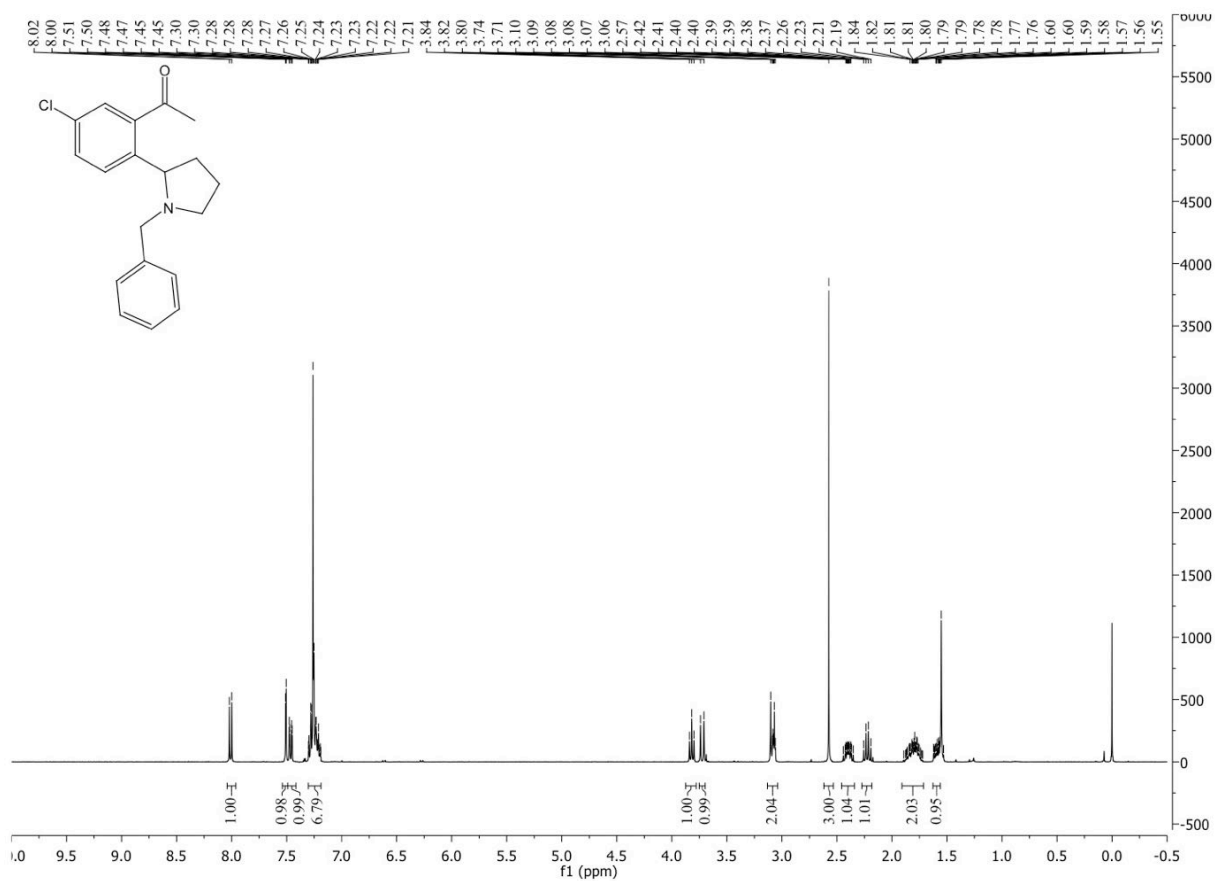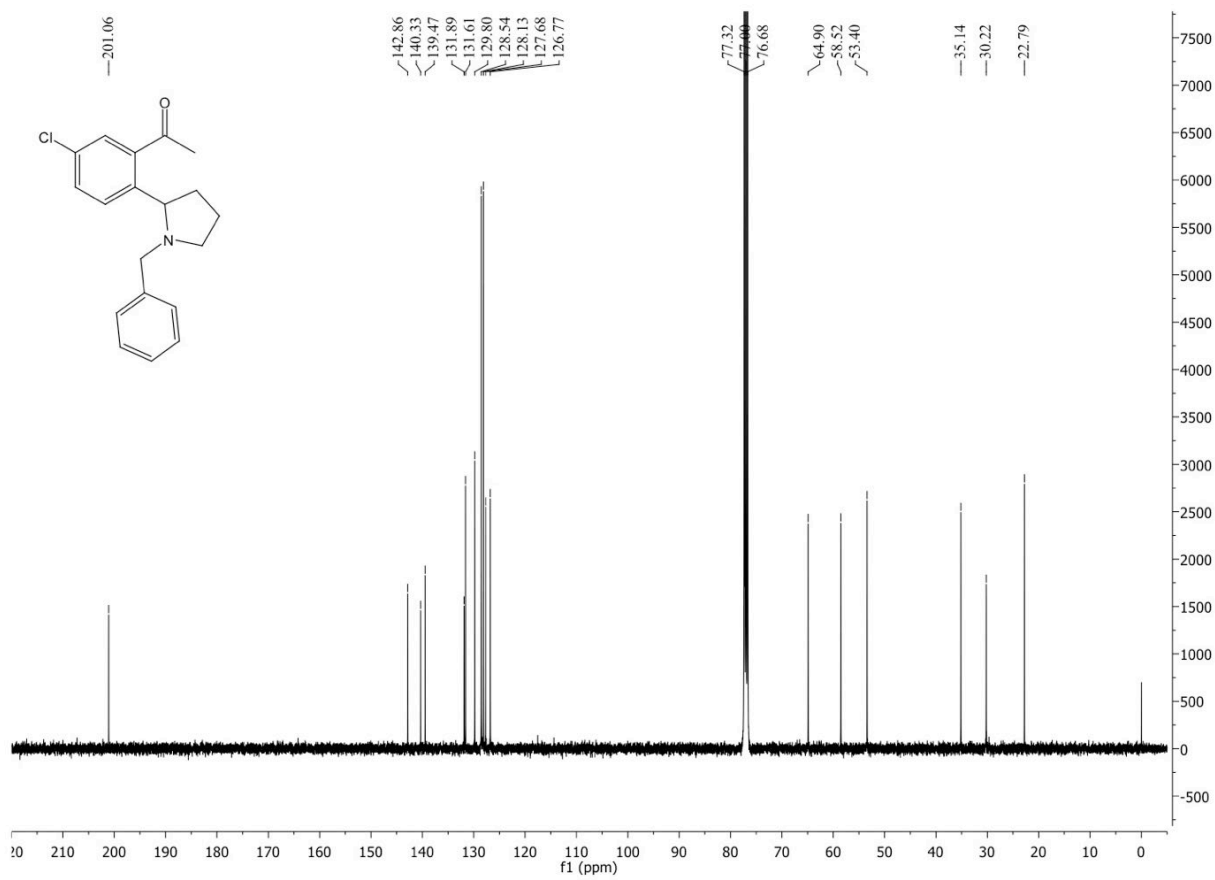

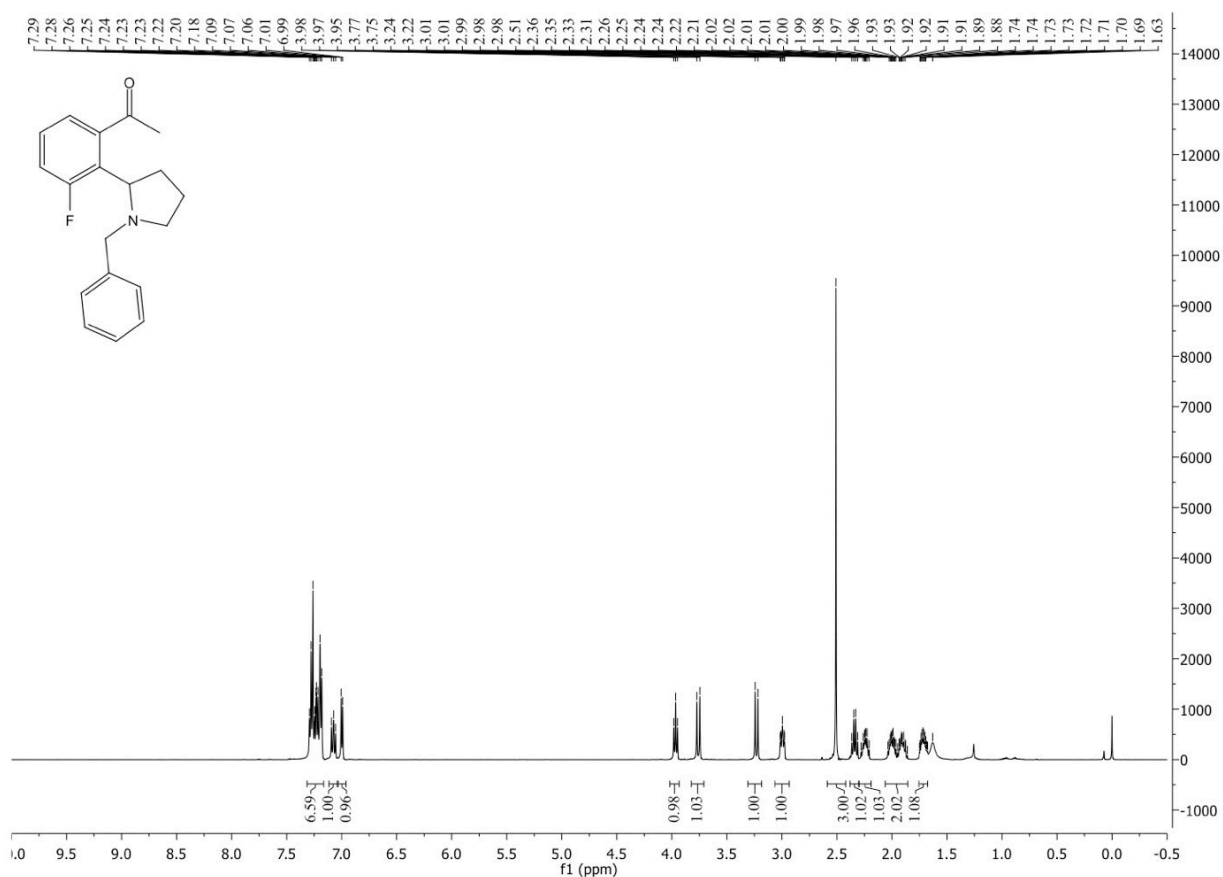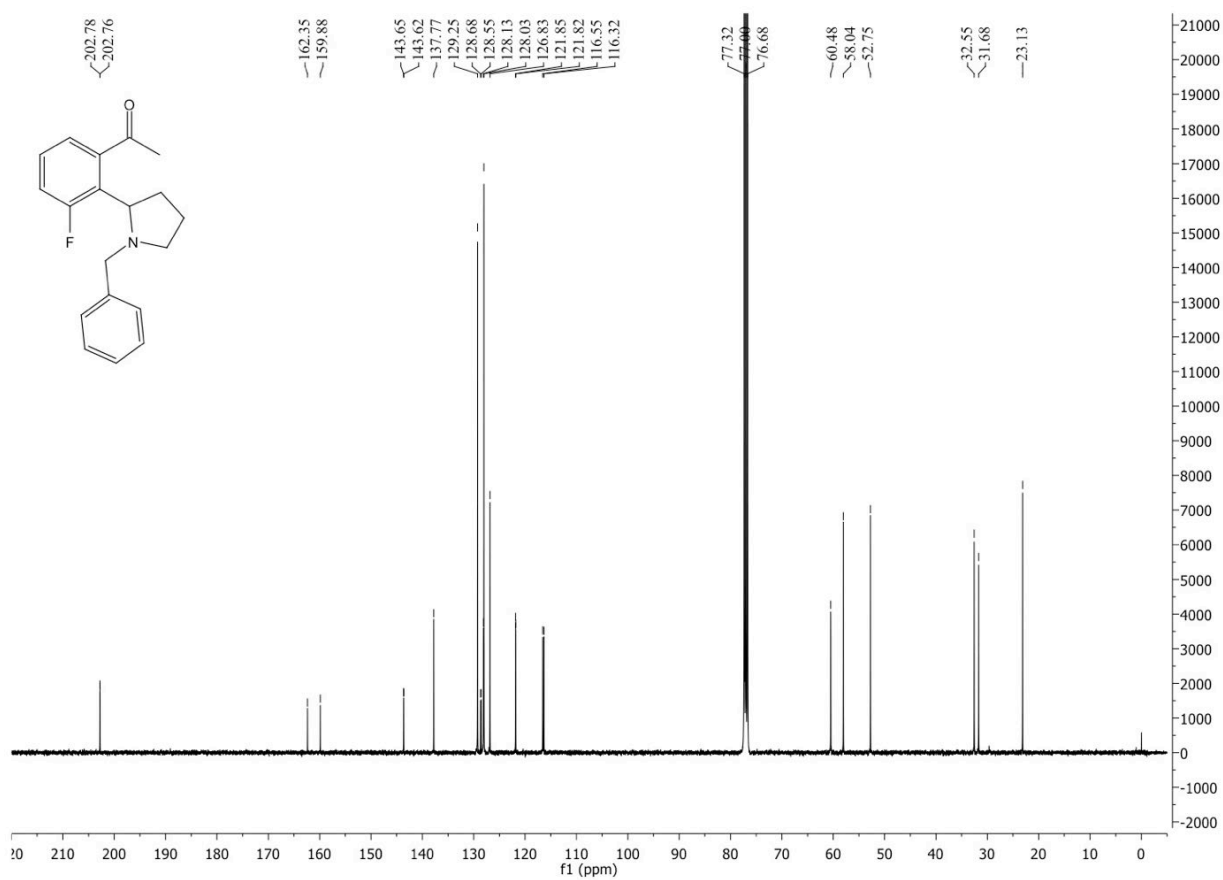

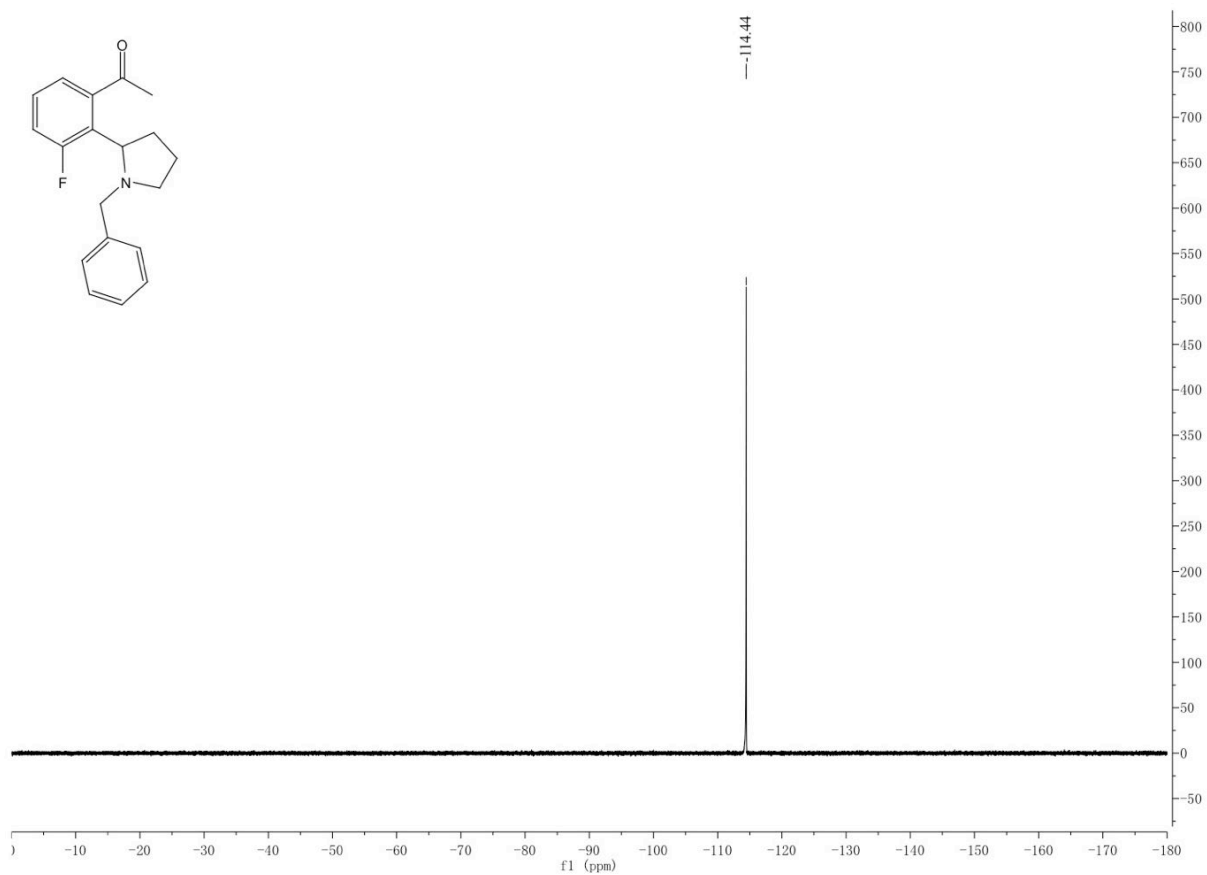

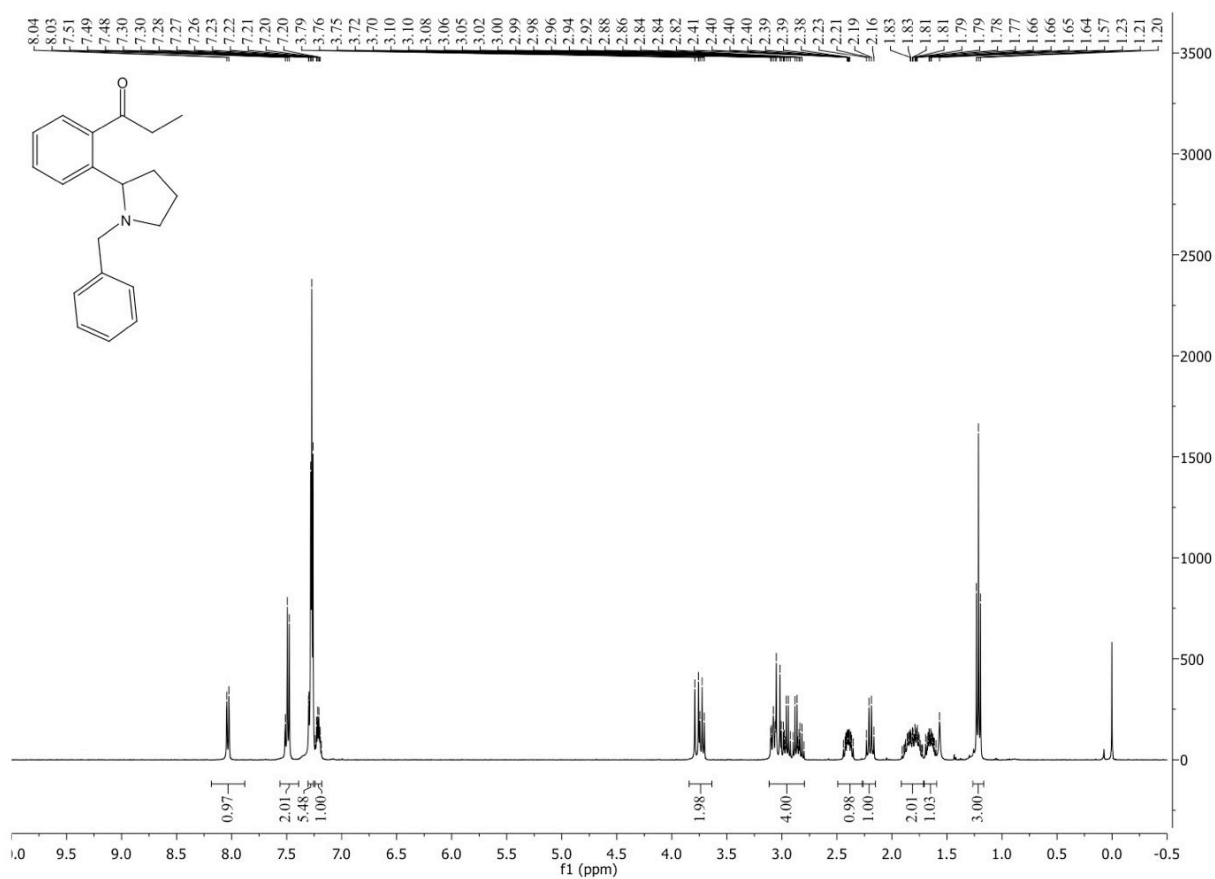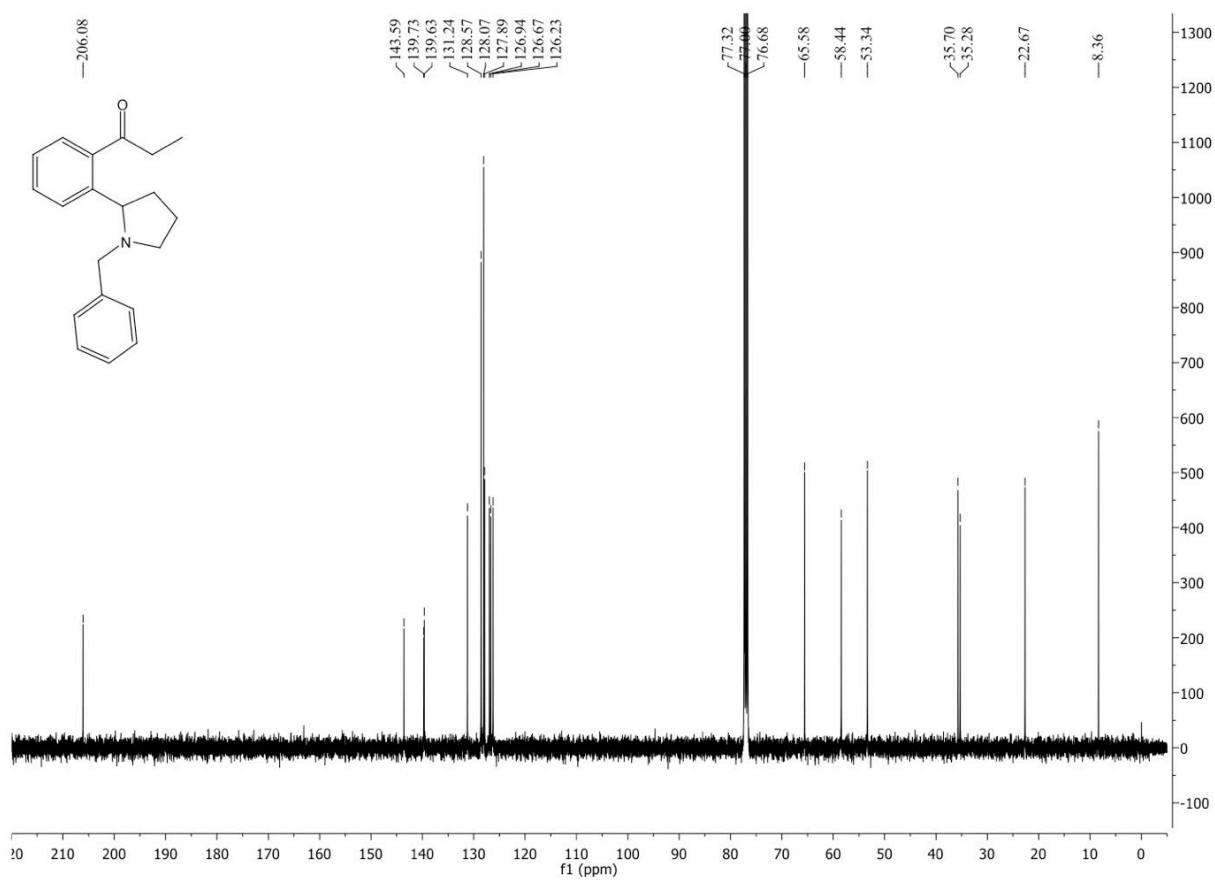

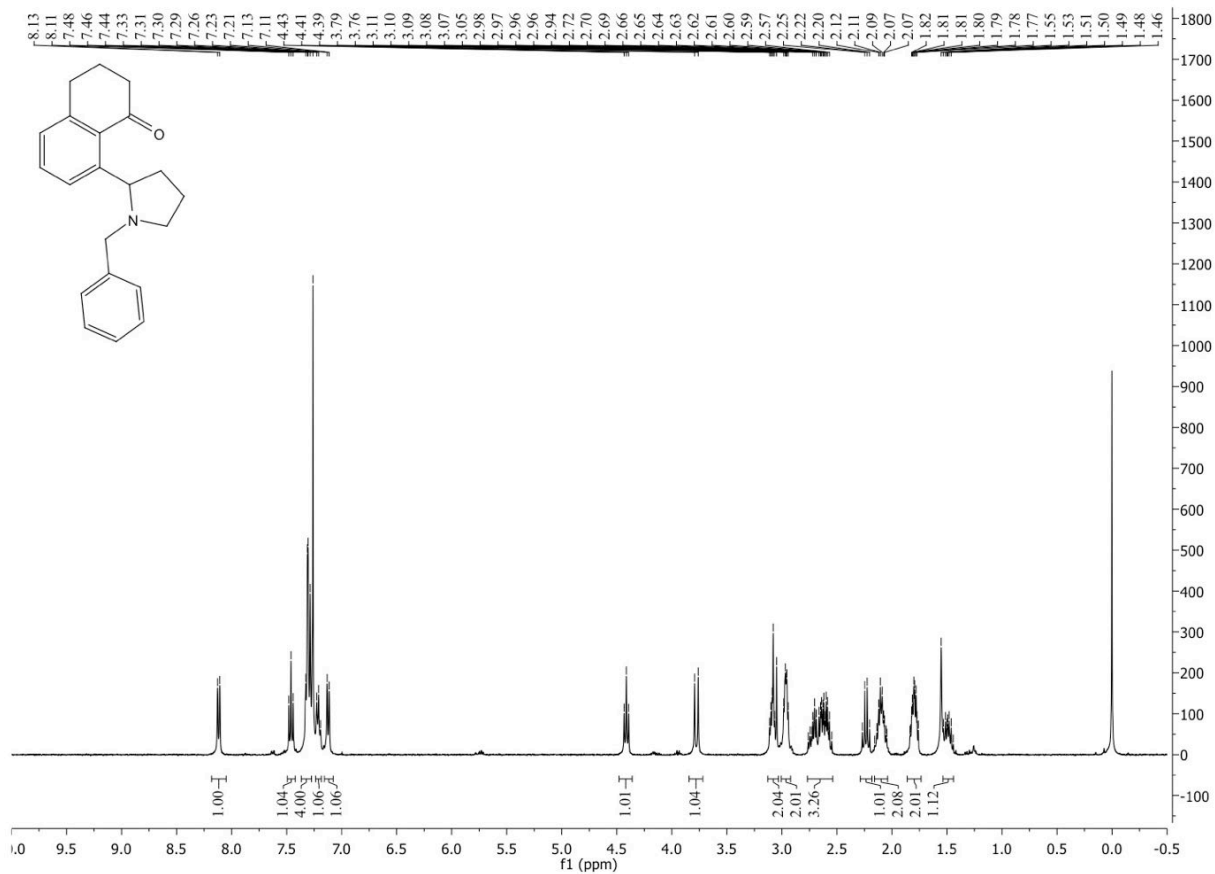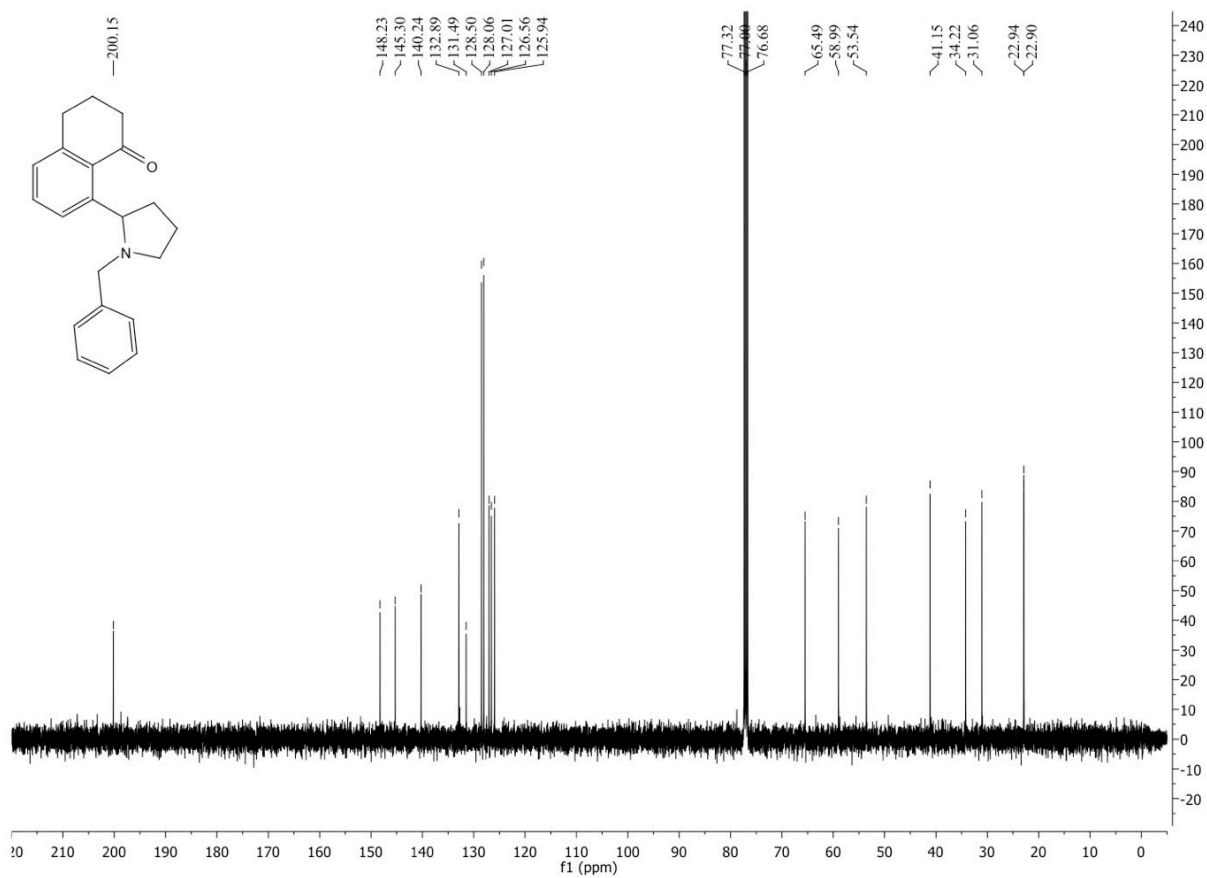

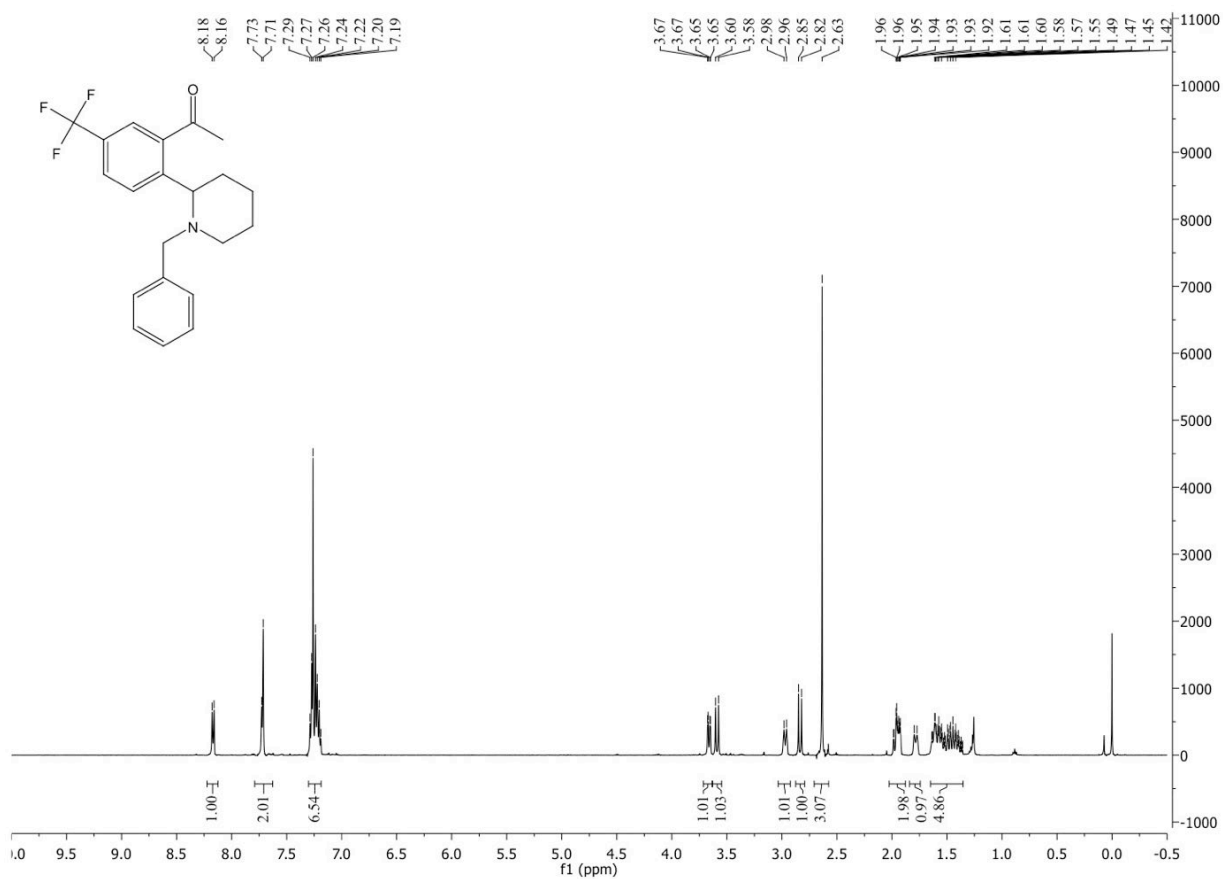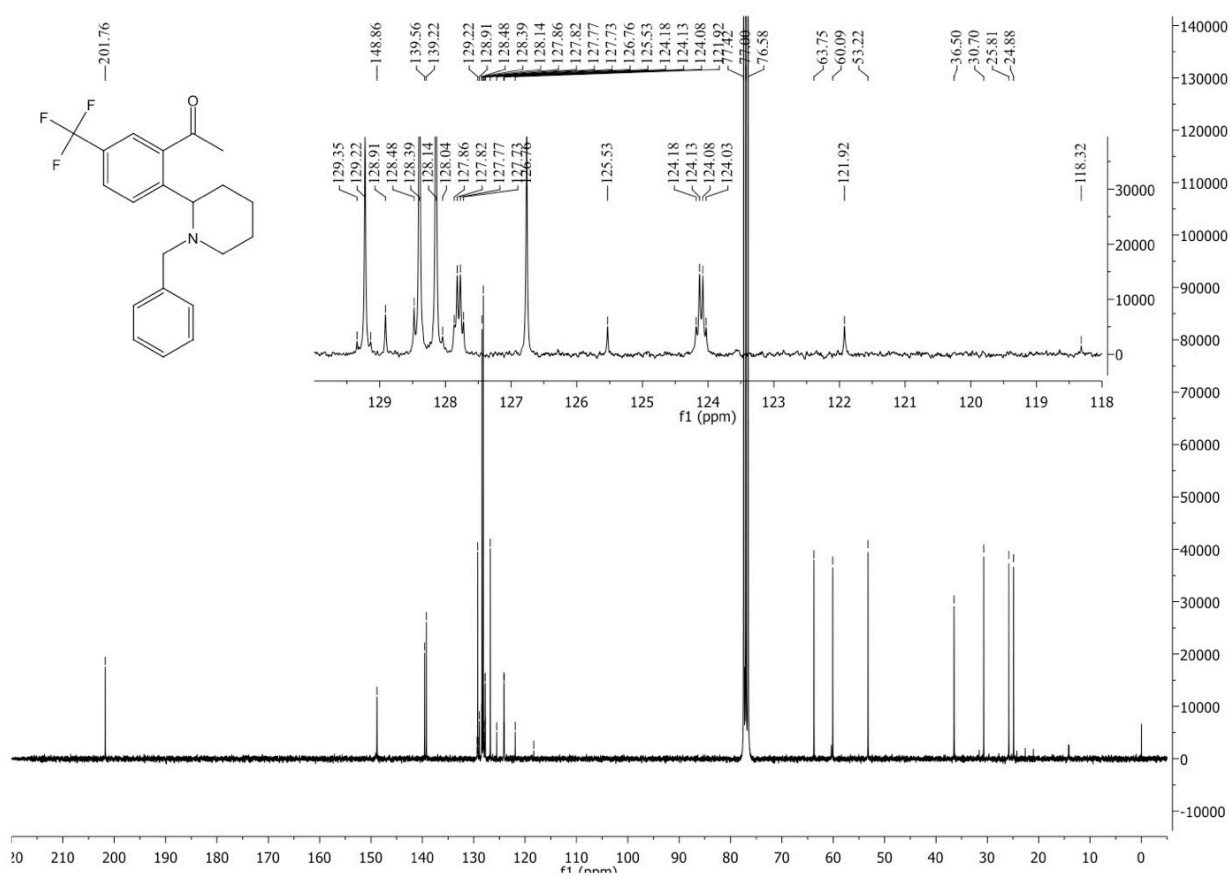

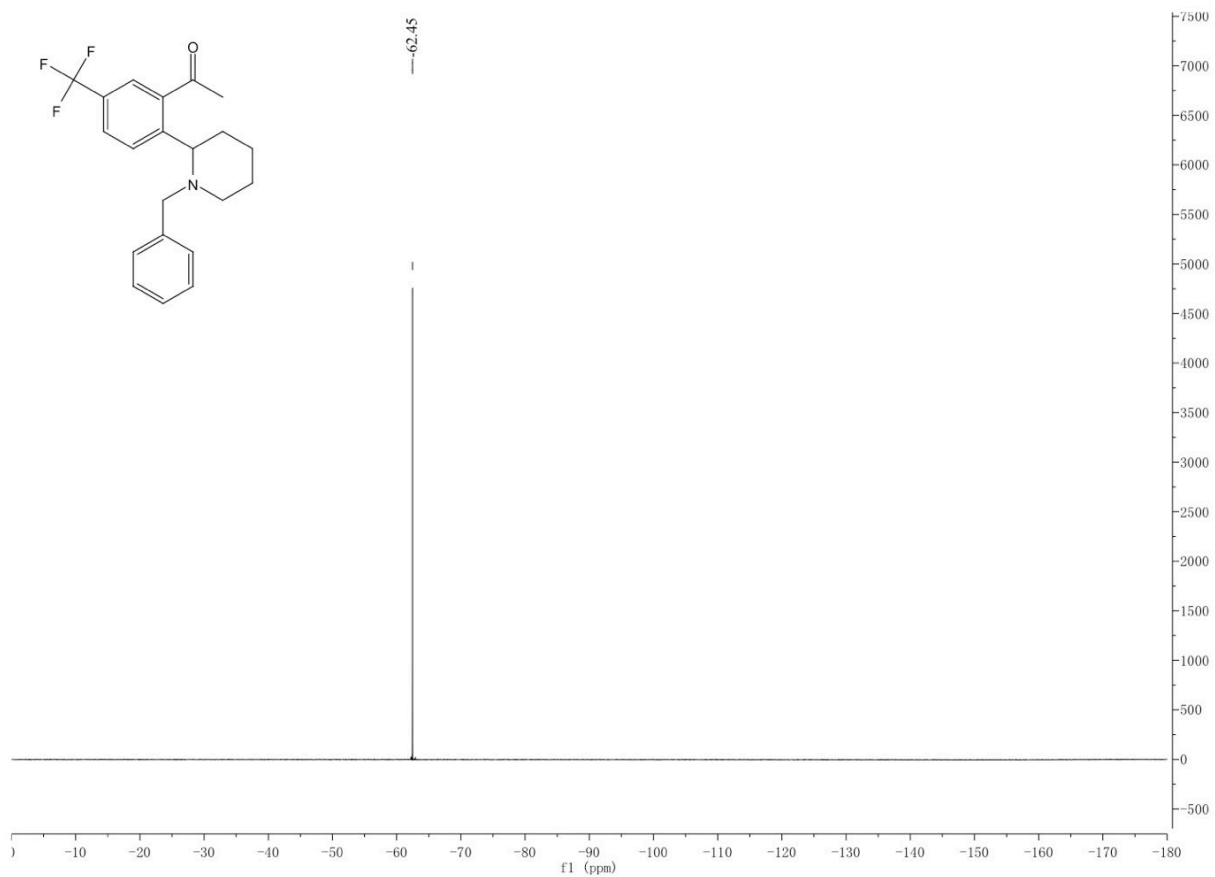

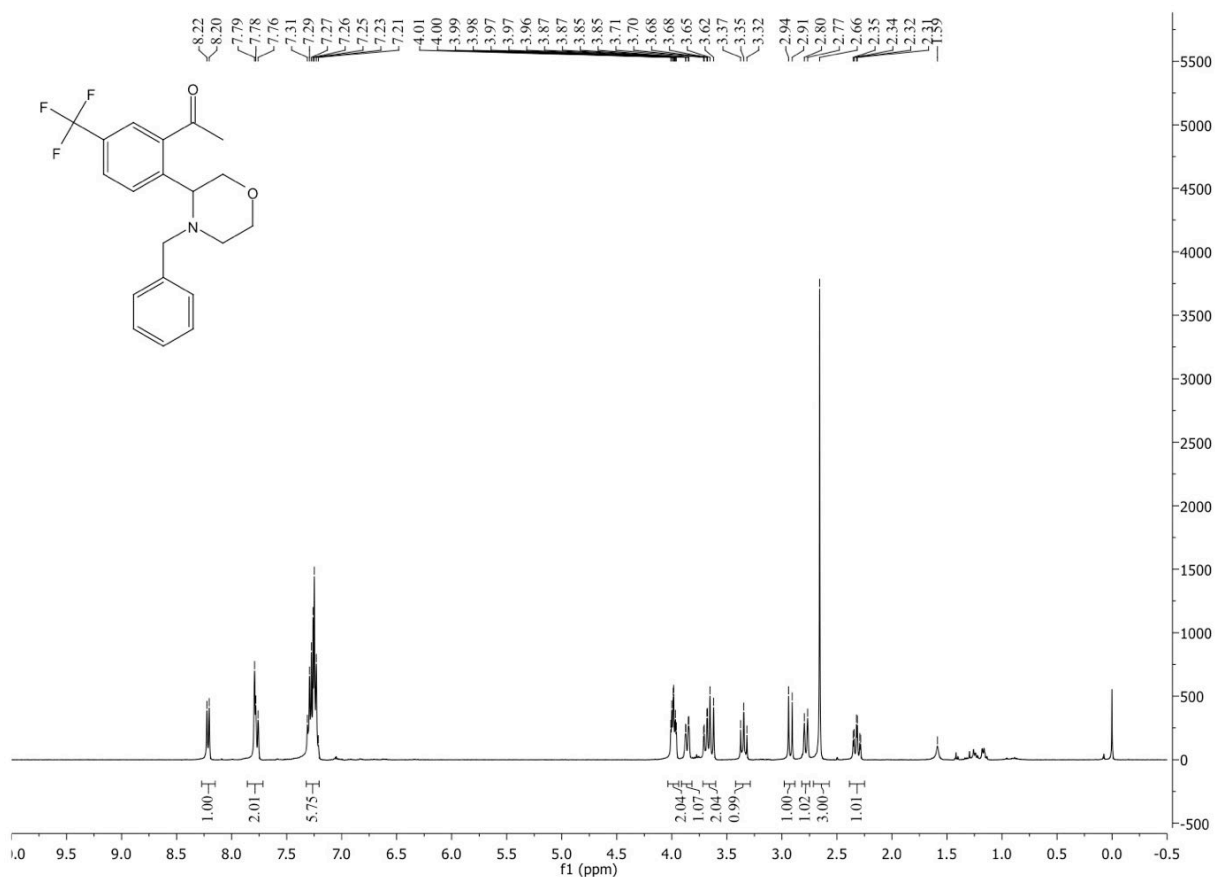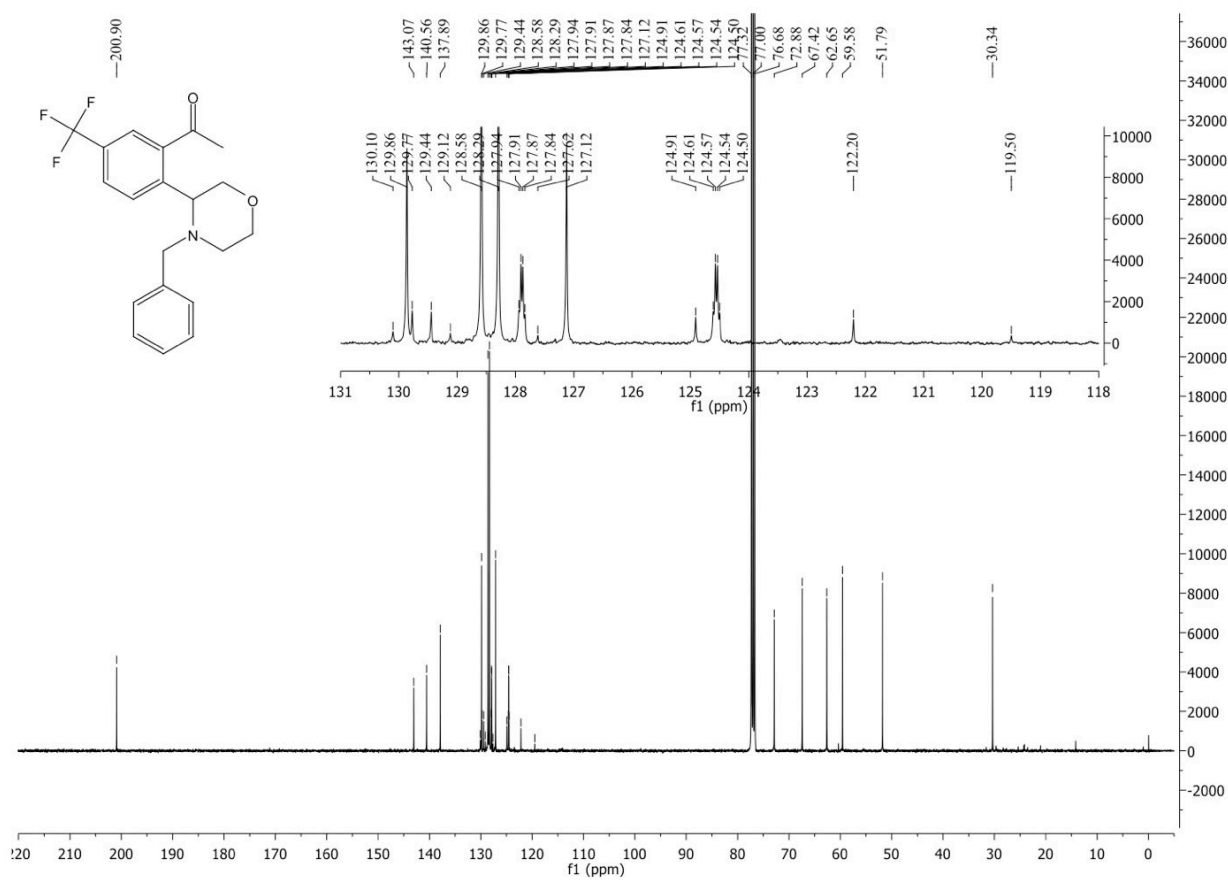



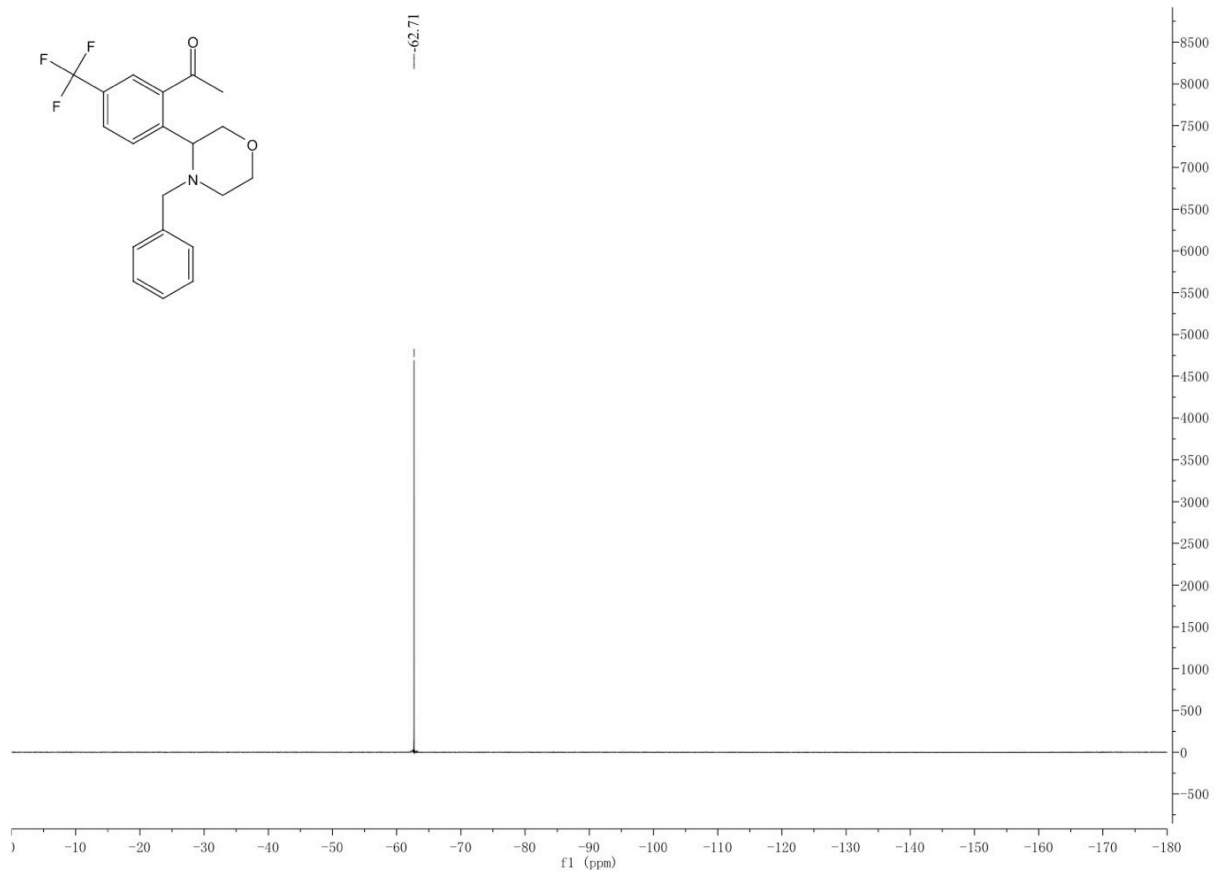

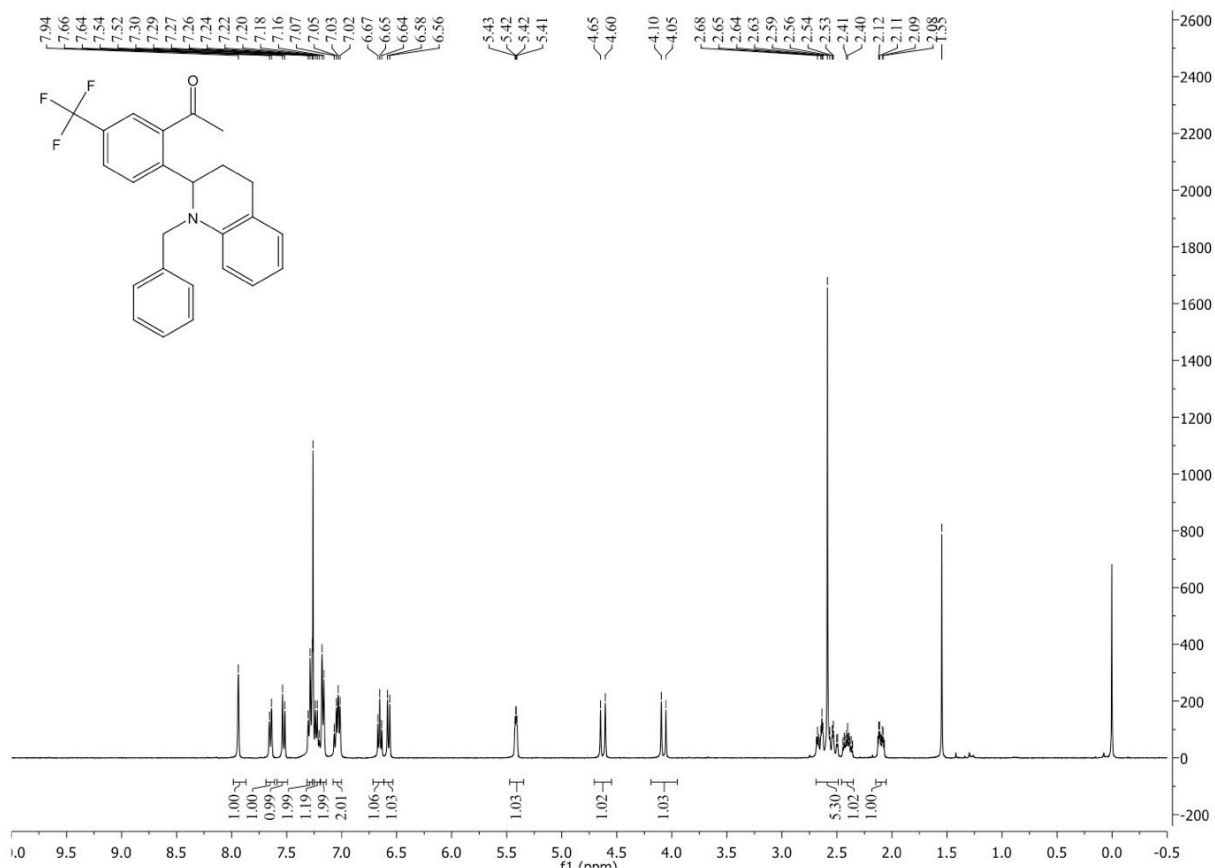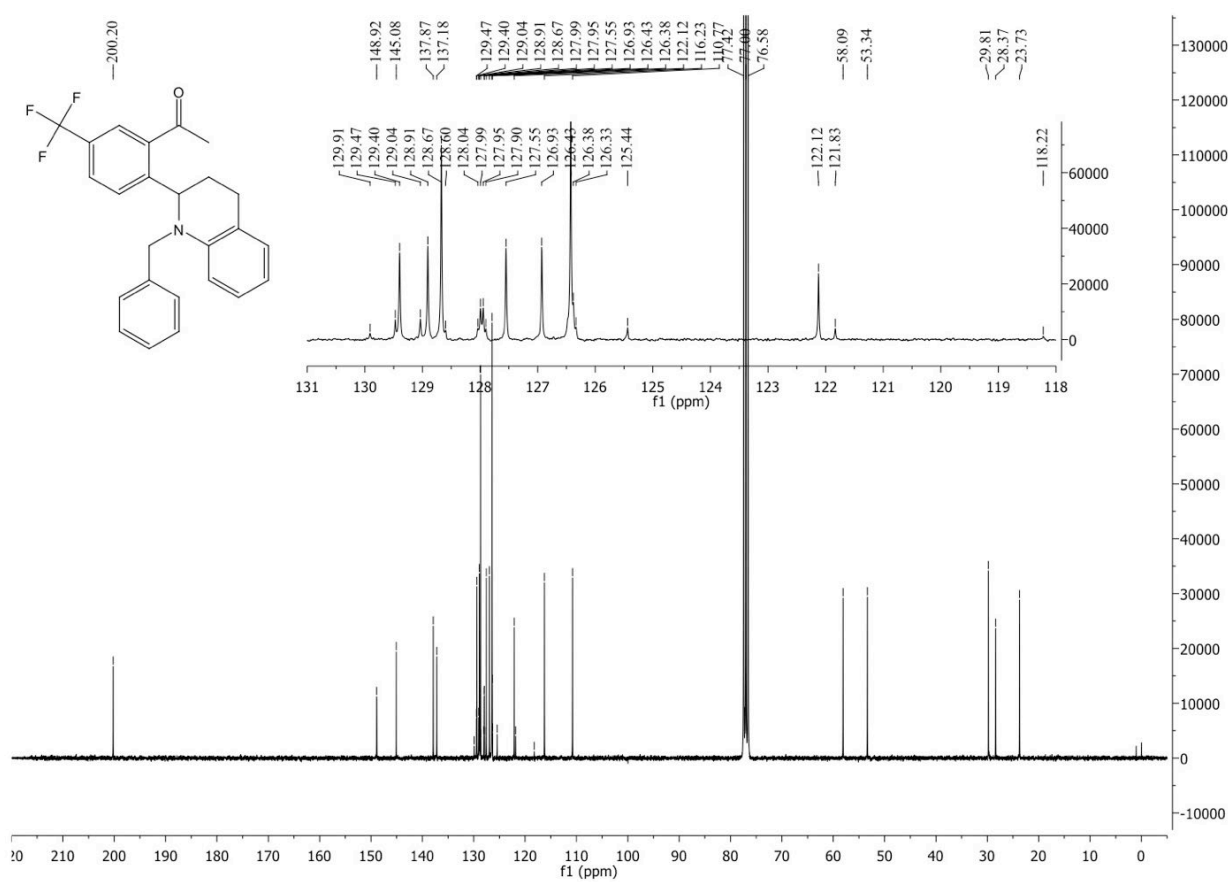

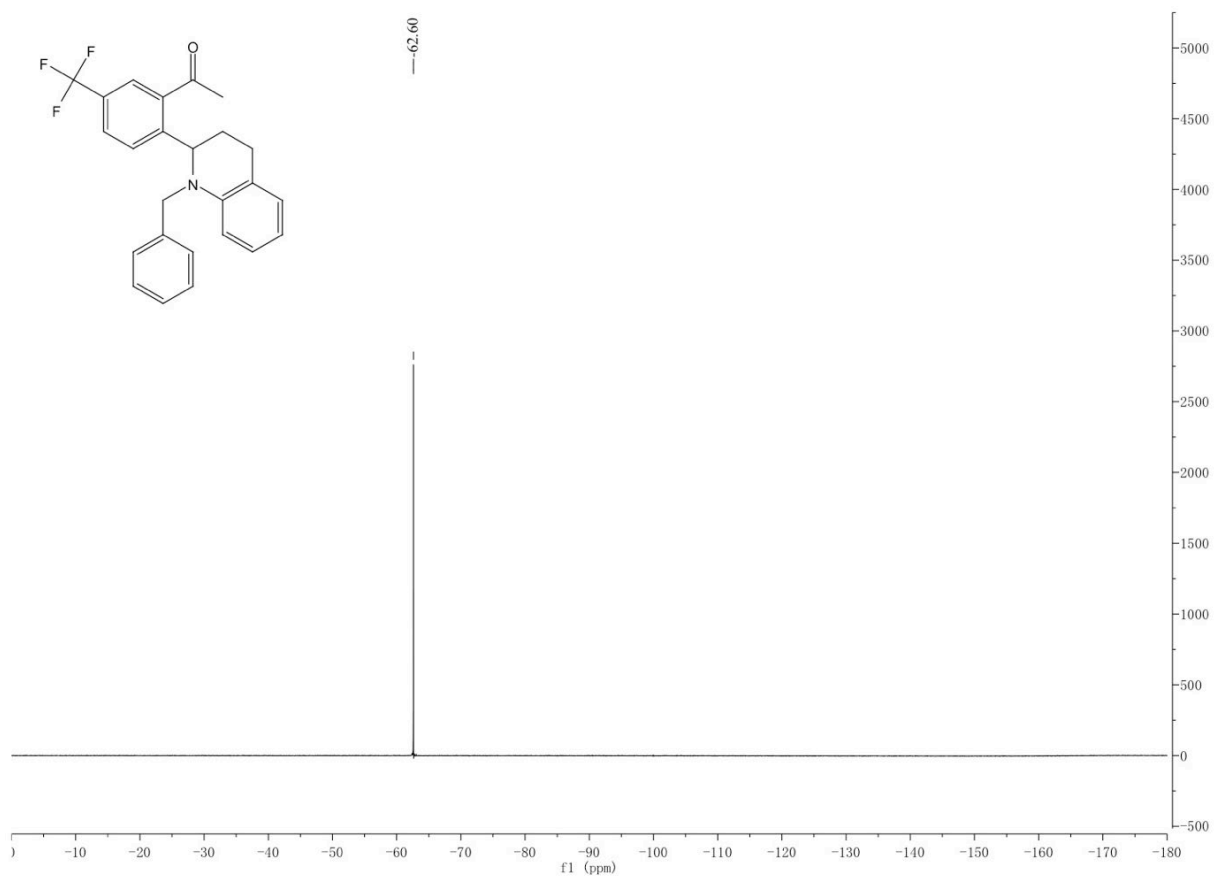

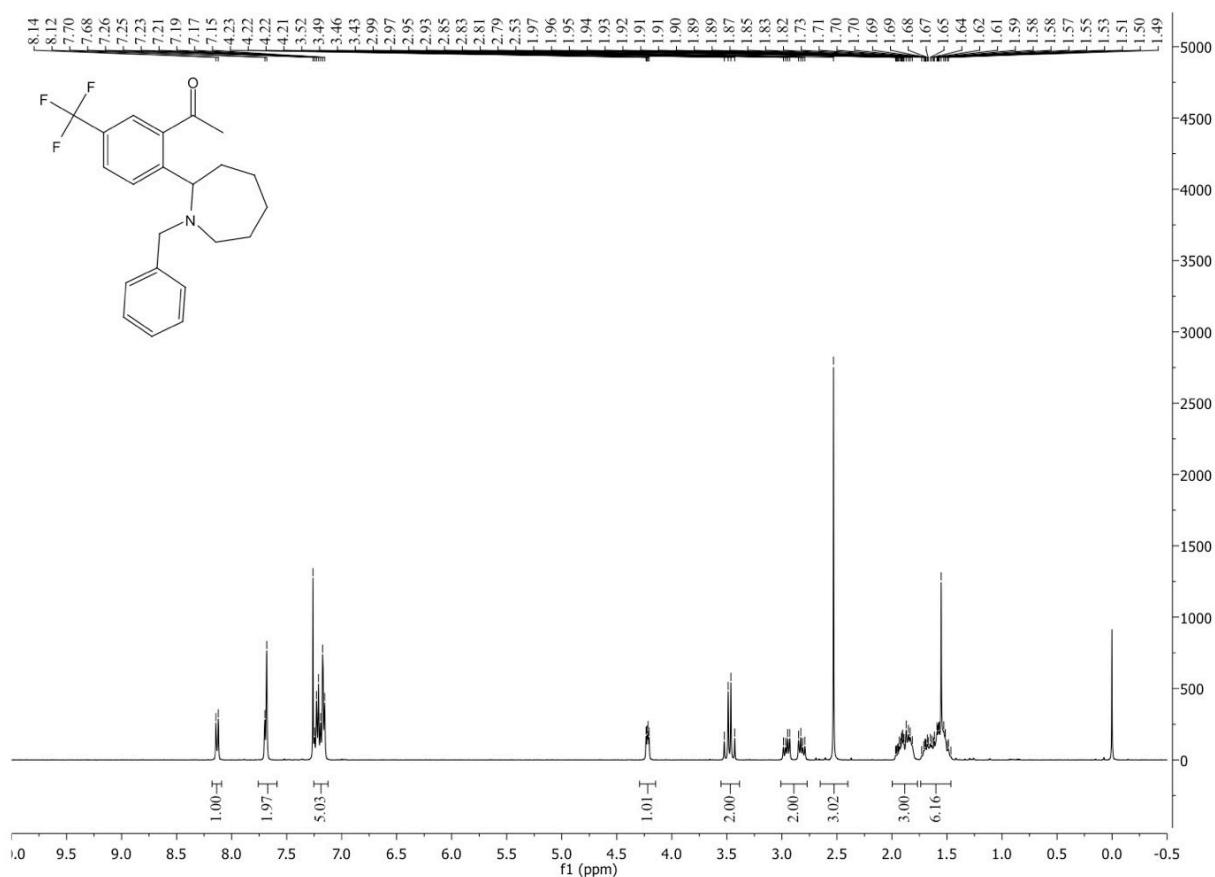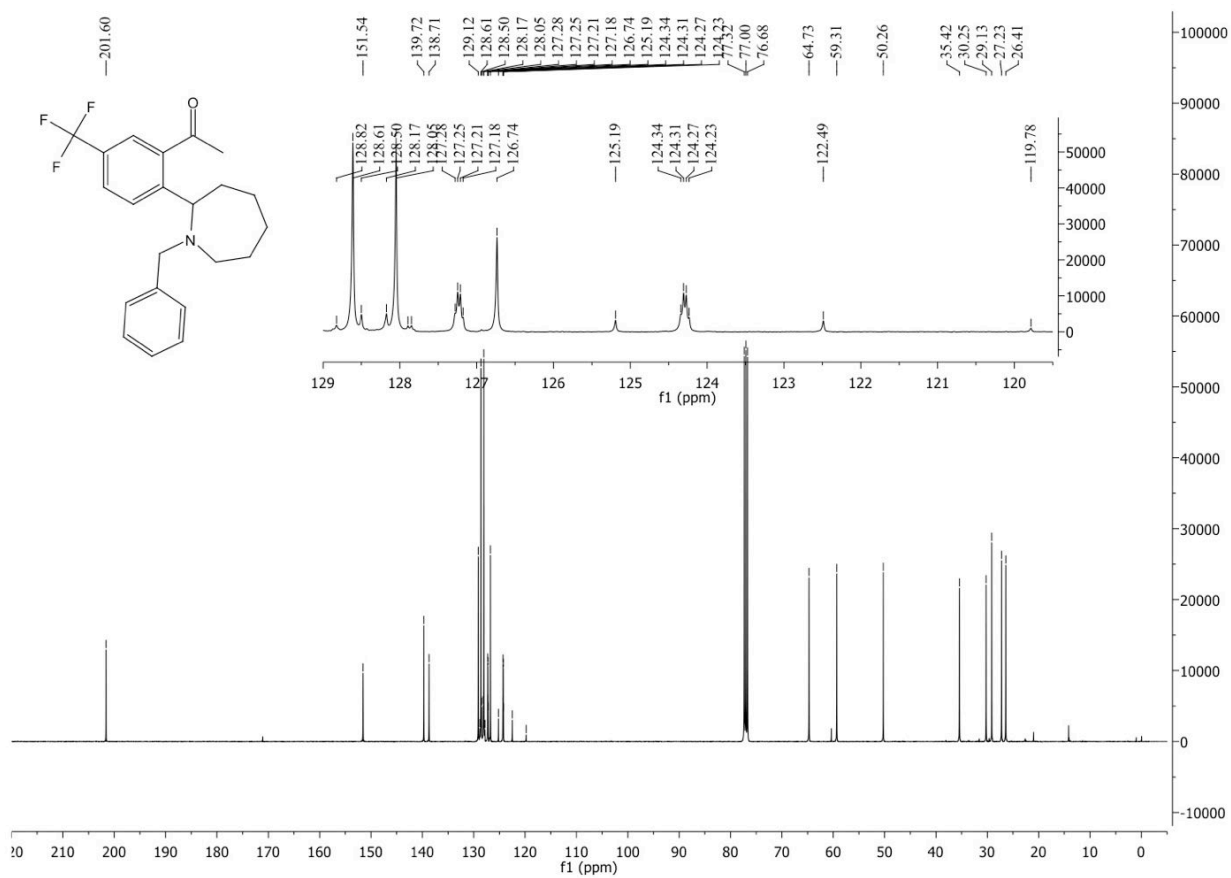

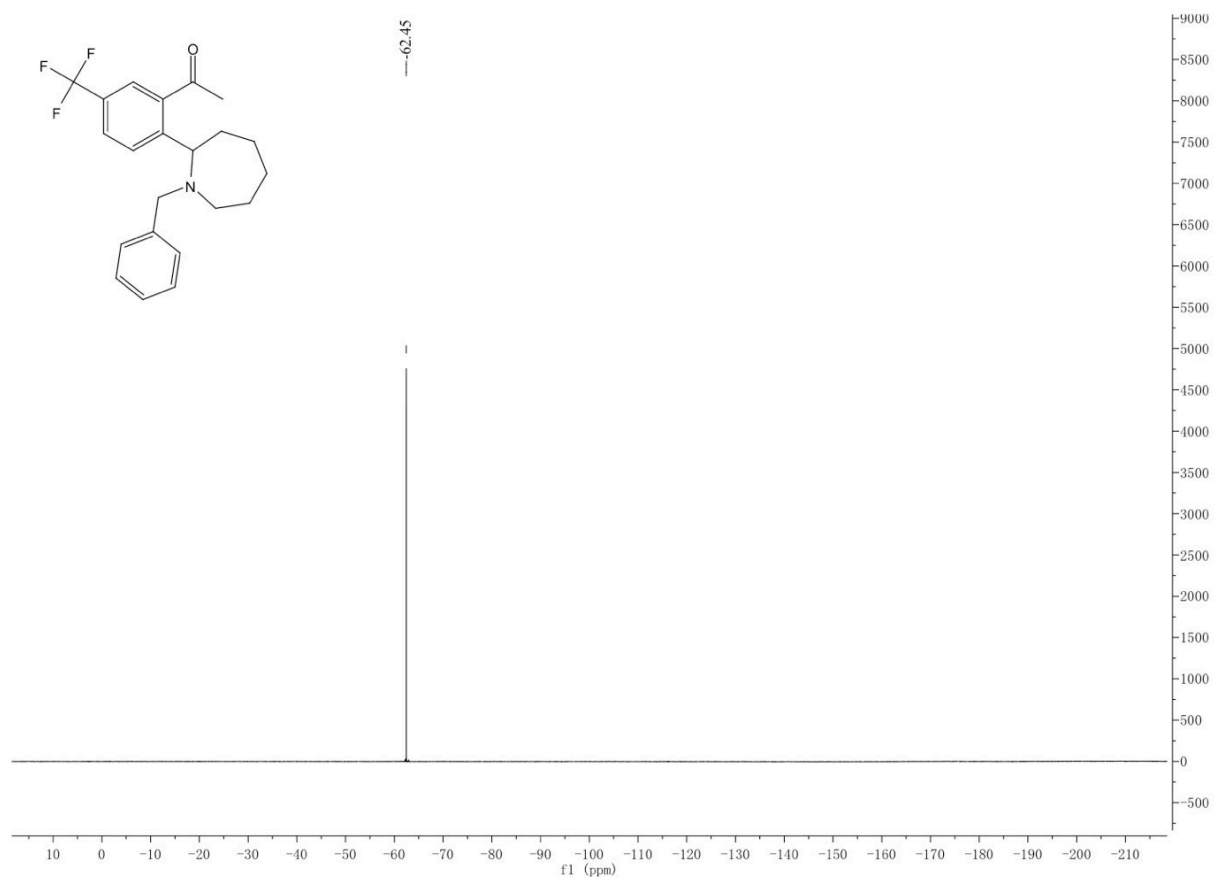

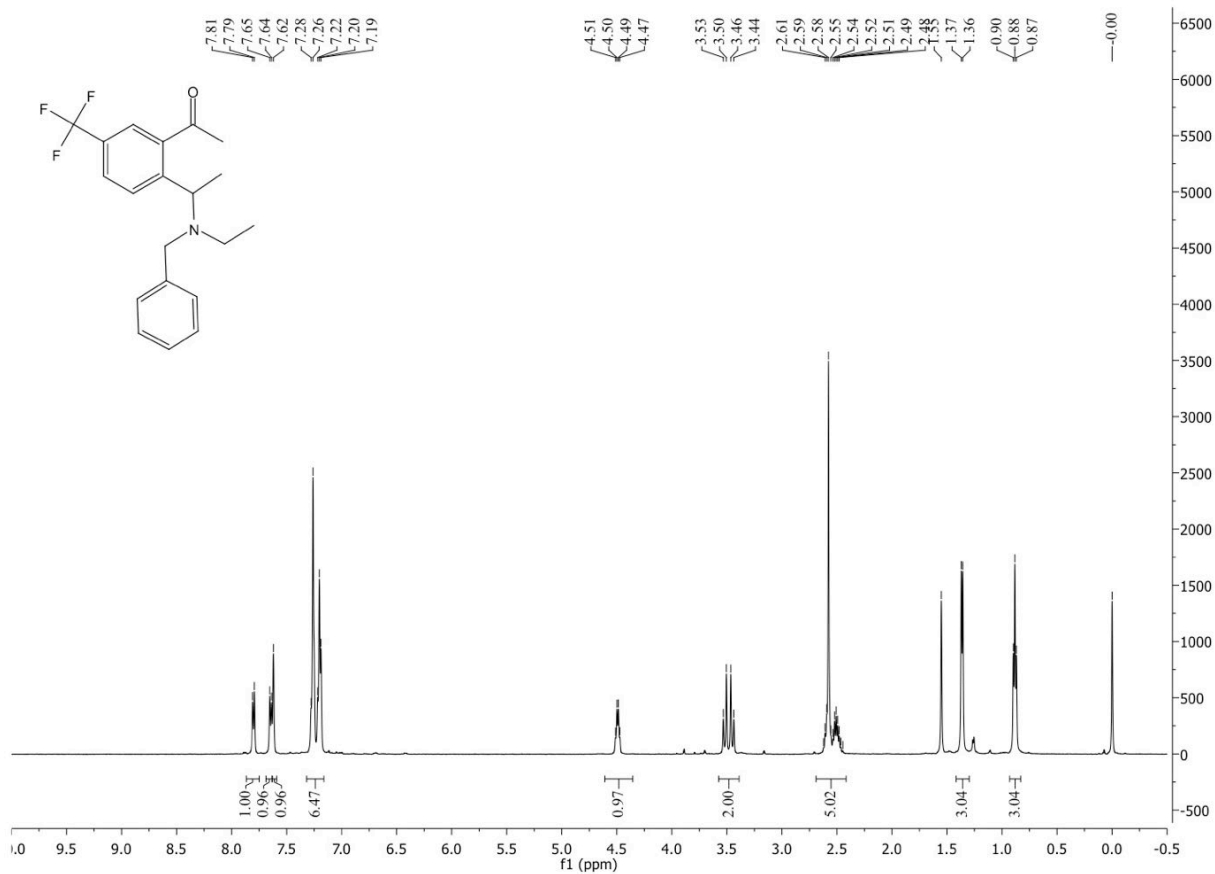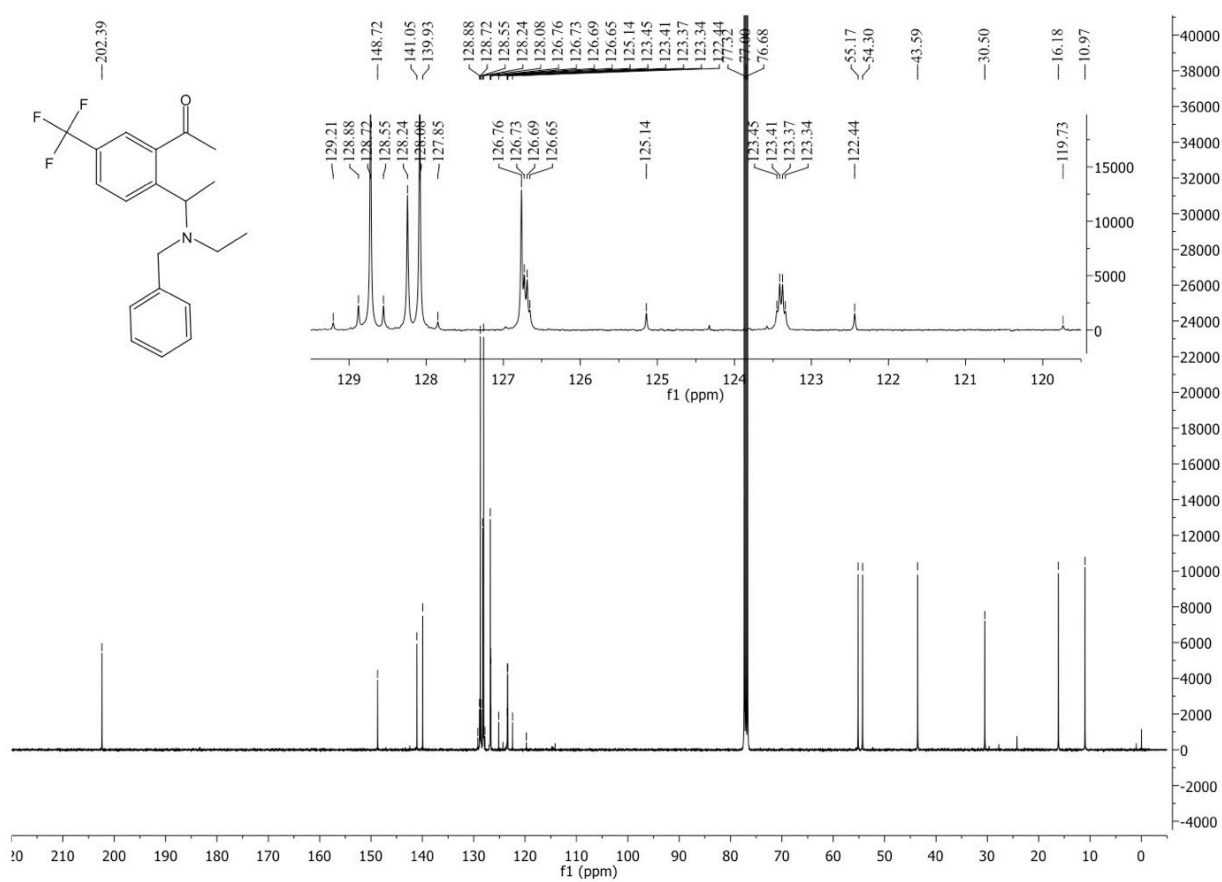

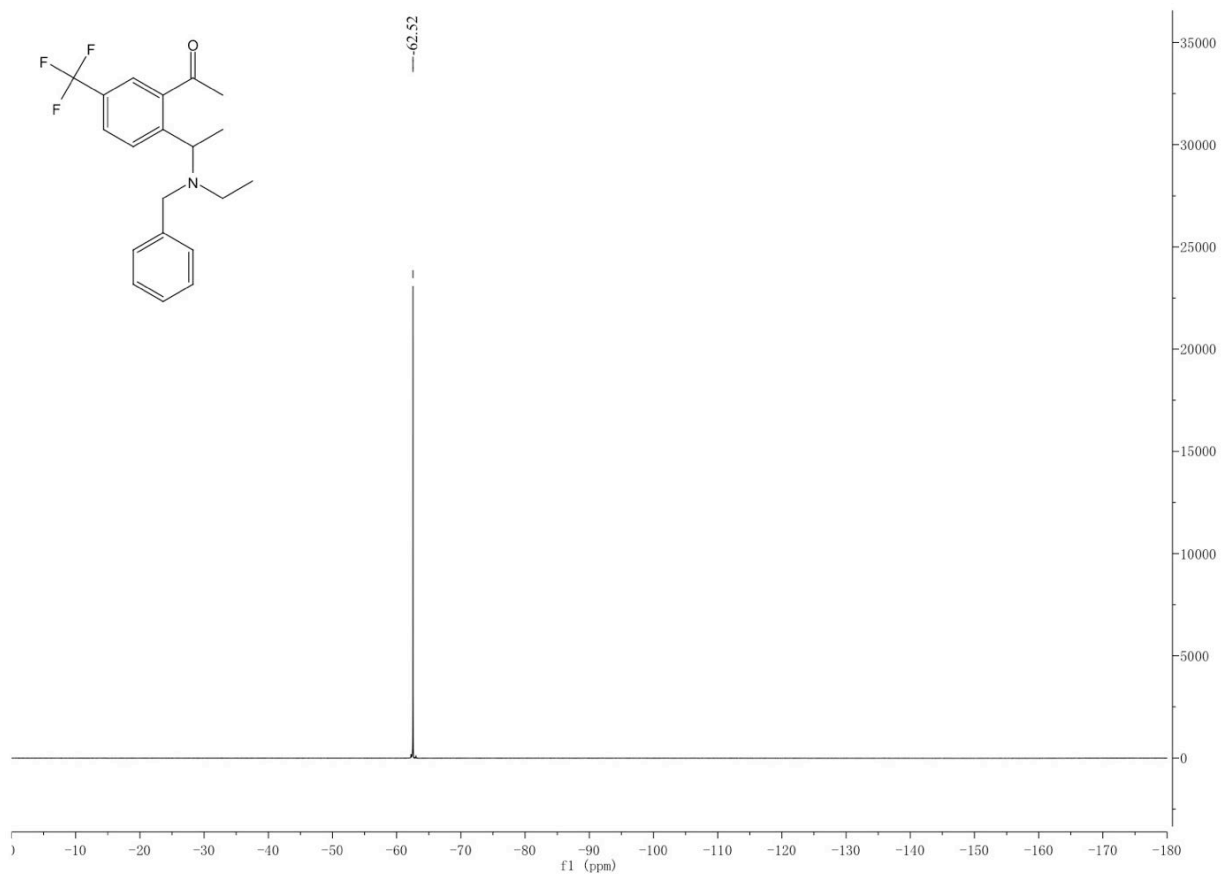

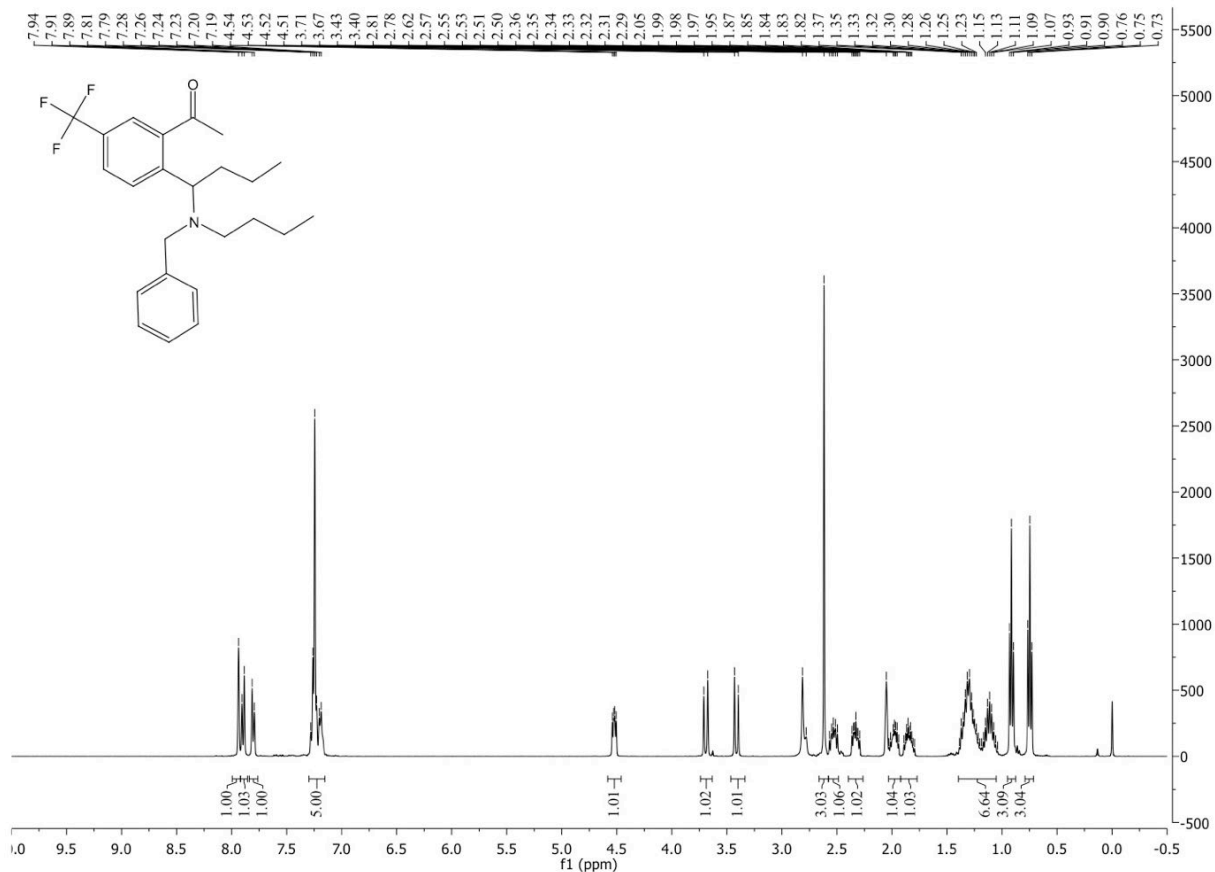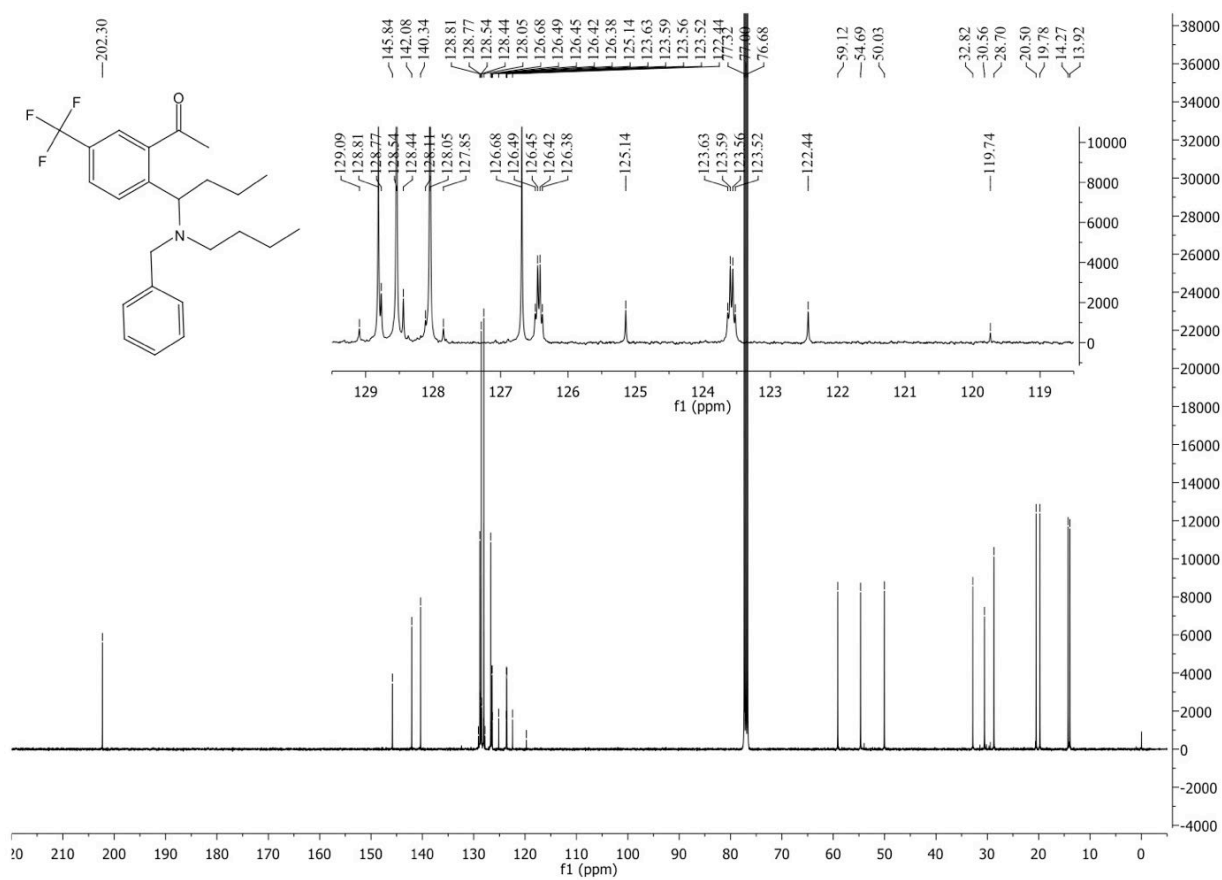



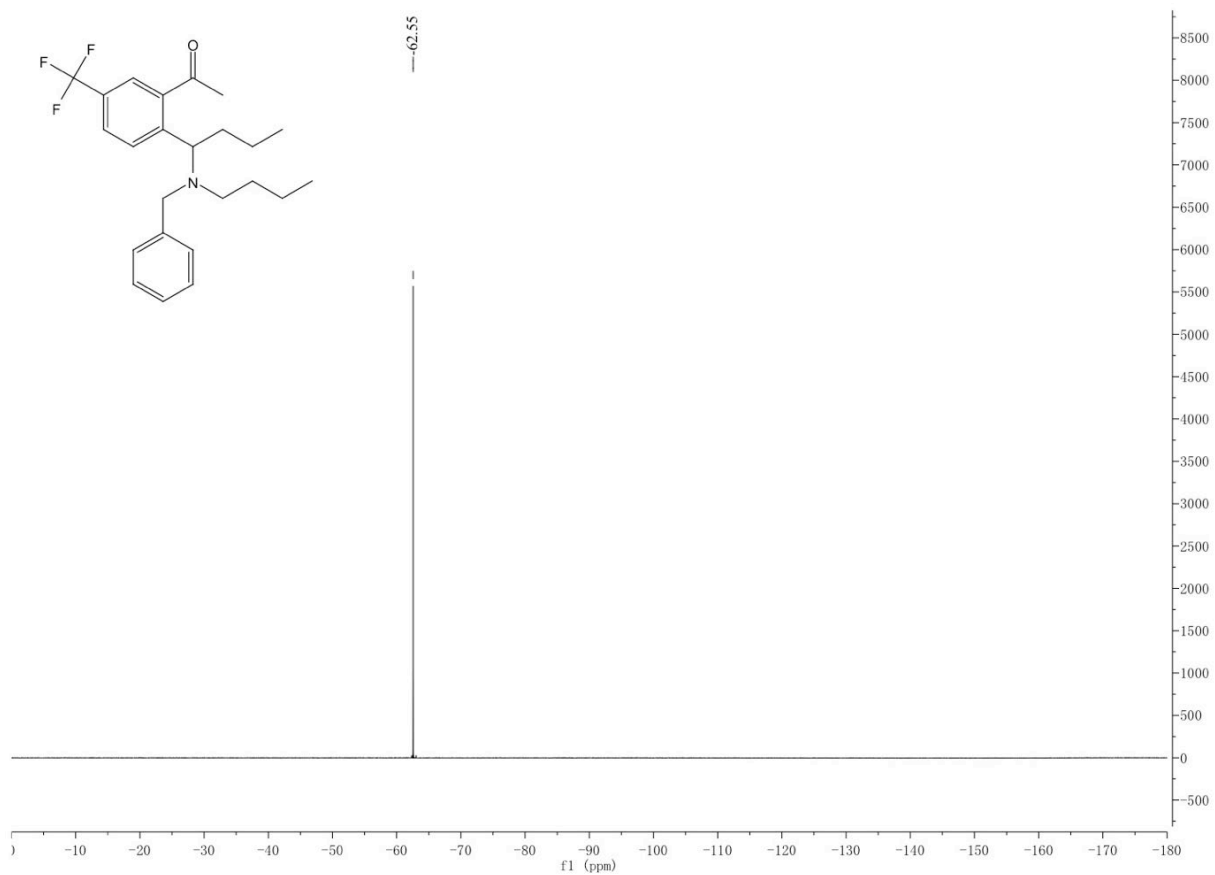

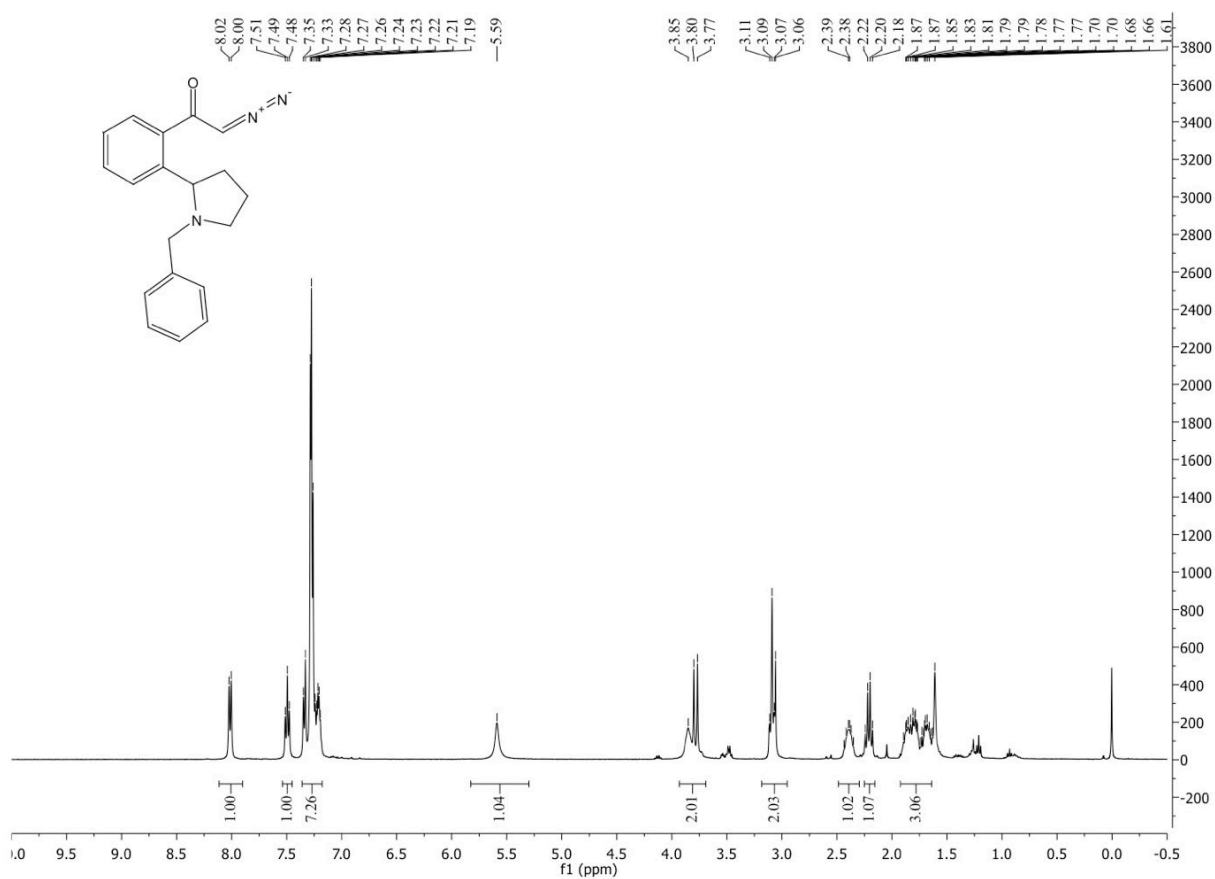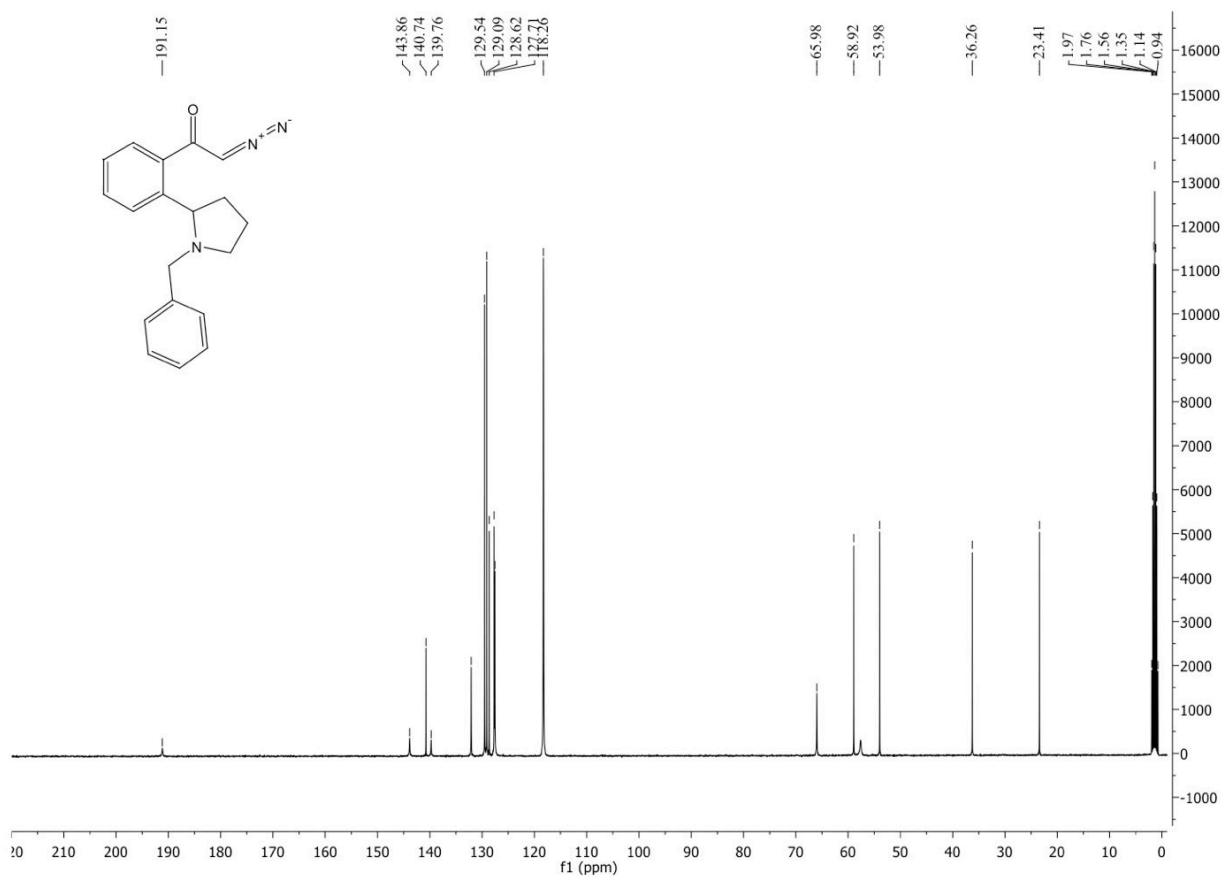

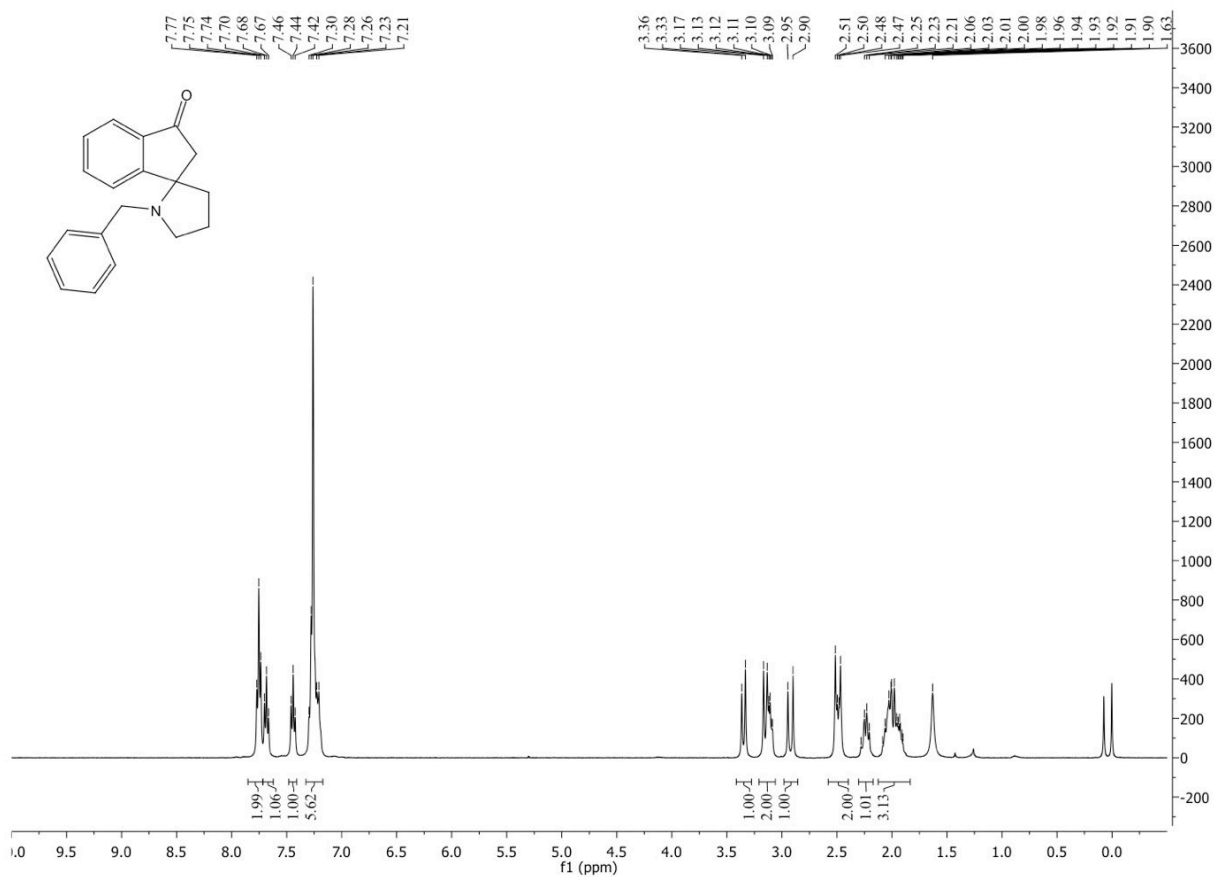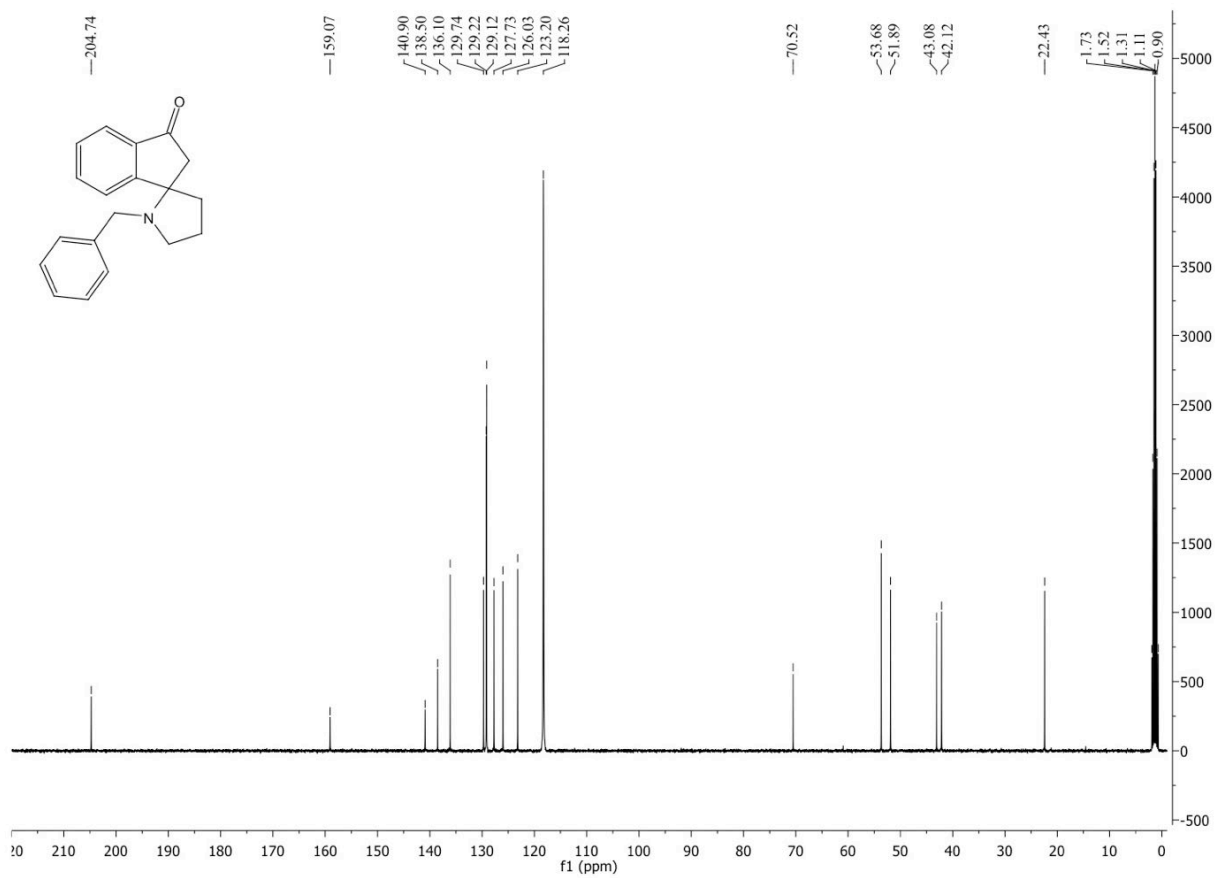

Supplement: c7qo00906b1.pdf [file c7qo00906b1.pdf]
